# Supplementary material for: Base-promoted fused β-carboline formation from 2-(1H-indol-3-yl)cyclohexan-1-ones, aldehydes and ammonium salts
Source: Royal Society of Chemistry journal article supplement (doi:10.1039/d4qo00551a), 2024-01-01

## Supporting Information

### Base-promoted fused $\beta$ -carboline formation from 2-(1*H*-indol-3-yl)cyclohexan-1-ones, aldehydes and ammonium salts

Jinjin Chen,<sup>‡a,b</sup> Yu Zhang,<sup>‡a</sup> Xinping Liu,<sup>\*a</sup> Kang Liu,<sup>a</sup> Junting Wu,<sup>a</sup> Xinlei Peng<sup>a</sup> and Guo-Jun Deng<sup>\*b</sup>

<sup>a</sup> School of Pharmaceutical Science, Hengyang Medical School, University of South China, Hengyang 421001, China. E-mail: xinpinglei@usc.edu.cn.

<sup>b</sup> Key Laboratory for Green Organic Synthesis and Application of Hunan Province, Key Laboratory of Environmentally Friendly Chemistry and Application of Ministry of Education, College of Chemistry, Xiangtan University, Xiangtan 411105, China. E-mail: gjdeng@xtu.edu.cn.

<sup>‡</sup> These authors contributed equally.

#### Table of Contents

|                                                                           |    |
|---------------------------------------------------------------------------|----|
| 1. General information.....                                               | 2  |
| 2. General procedure for the synthesis of $\beta$ -carbolines.....        | 2  |
| 3. General procedure for the synthesis of benzo- $\beta$ -carbolines..... | 2  |
| 4. Characterization of products.....                                      | 3  |
| 5. Crystal data and structure refinement for 3a and 4b.....               | 25 |
| 6. <sup>1</sup> H and <sup>13</sup> C NMR spectra of all products.....    | 41 |

## 1. General information

All reactions were carried out under an atmosphere of air unless otherwise noted. Column chromatography was performed using silica gel (200-300 mesh).  $^1\text{H}$  NMR and  $^{13}\text{C}$  NMR spectra were recorded on Bruker-AV (400 and 100 MHz, respectively) instrument internally referenced to tetramethylsilane (TMS) or chloroform. High-resolution mass spectra (HRMS) was performed on FTMS ICR MS BRUKER 7T or Agilent 6230 TOF LC/MS. Melting points were measured on BÜCHI B-545 melting point instrument and were uncorrected. The structure of known compounds was further corroborated by comparing their  $^1\text{H}$  NMR,  $^{13}\text{C}$  NMR data and MS data with those of literature.

## 2. General procedure for the synthesis of $\beta$ -carbolines.

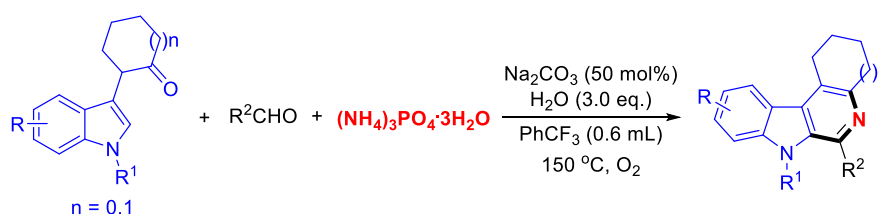

A 10 mL oven-dried reaction vessel was charged with 2-(1*H*-indol-3-yl)cyclohexan-1-ones (0.2 mmol), aldehydes (0.4 mmol),  $(\text{NH}_4)_3\text{PO}_4 \cdot 3\text{H}_2\text{O}$  (0.2 mmol, 40.6 mg),  $\text{Na}_2\text{CO}_3$  (0.1 mmol, 10.6 mg),  $\text{H}_2\text{O}$  (0.6 mmol, 10.8  $\mu\text{L}$ ), and  $\text{PhCF}_3$  (0.6 mL). The reaction vessel stirred at  $150\text{ }^\circ\text{C}$  for 12 h under oxygen atmosphere. After cooling to room temperature, the volatiles were removed under reduced pressure. The residue was purified by column chromatography on silica gel to give the products.

## 3. General procedure for the synthesis of Benzo- $\beta$ -carbolines.

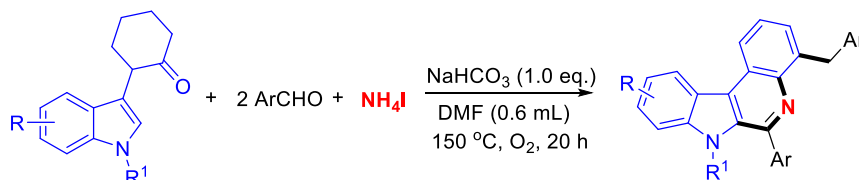

A 10 mL oven-dried reaction vessel was charged with 2-(1*H*-indol-3-yl)cyclohexan-1-ones (0.2 mmol), aldehydes (0.6 mmol),  $\text{NH}_4\text{I}$  (0.4 mmol, 58.0 mg),  $\text{NaHCO}_3$  (0.2 mmol, 16.8 mg), and  $\text{DMF}$  (0.6 mL). The reaction vessel stirred at  $150\text{ }^\circ\text{C}$  for 20 h under oxygen atmosphere. After

cooling to room temperature, the reaction was diluted with ethyl acetate (6 mL) and washed with saturated salt water. The organic layer was separated and the aqueous layer was extracted with ethyl acetate for three times. The combined organic layer was dried over sodium sulfate and the volatiles were removed under reduced pressure. The residue was purified by column chromatography on silica gel to give the products.

#### 4. Characterization of products

##### 6-phenyl-2,3,4,7-tetrahydro-1*H*-indolo[2,3-*c*]quinolone (**3a**)

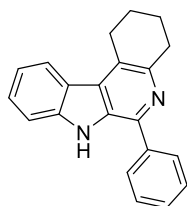

The reaction was conducted with 2-(1*H*-indol-3-yl)cyclohexan-1-one (**1a**, 0.2 mmol, 42.6 mg), benzaldehyde (**2a**, 0.4 mmol, 40.8  $\mu$ L),  $(\text{NH}_4)_3\text{PO}_4 \cdot 3\text{H}_2\text{O}$  (0.2 mmol, 40.6 mg),  $\text{Na}_2\text{CO}_3$  (0.1 mmol, 10.6 mg),  $\text{H}_2\text{O}$  (0.6 mmol, 10.8  $\mu$ L), and  $\text{PhCF}_3$  (0.6 mL). The reaction vessel stirred at 150  $^\circ\text{C}$  for 12 h under oxygen atmosphere. The residue was purified by column chromatography on silica gel (petroleum ether/EtOAc = 10:1) to yield the desired product **3a** as white solid, yield: 53.6 mg (90%), mp 196-199  $^\circ\text{C}$ .

$^1\text{H}$  NMR (400 MHz,  $\text{CDCl}_3$ , ppm):  $\delta$  8.42 (s, 1H), 8.22 (d,  $J = 8.0$  Hz, 1H), 7.90 (d,  $J = 7.1$  Hz, 2H), 7.58 – 7.43 (m, 5H), 7.29 (d,  $J = 7.8$  Hz, 1H), 3.41 (t,  $J = 5.6$  Hz, 2H), 3.16 (t,  $J = 5.6$  Hz, 2H), 2.06 – 2.03 (m, 4H).  $^{13}\text{C}$  { $^1\text{H}$ } NMR (100 MHz,  $\text{CDCl}_3$ , ppm):  $\delta$  146.8, 140.5, 139.9, 138.8, 131.7, 129.2, 128.4, 128.4, 128.2, 127.5, 125.4, 124.0, 122.6, 119.9, 111.2, 32.7, 27.1, 23.4, 22.8. HRMS (ESI)  $m/z$  calcd for  $\text{C}_{21}\text{H}_{19}\text{N}_2^+$  [ $\text{M}+\text{H}$ ] $^+$  299.1543, found 299.1543.

##### 6-(*p*-Tolyl)-2,3,4,7-tetrahydro-1*H*-indolo[2,3-*c*]quinolone (**3b**)

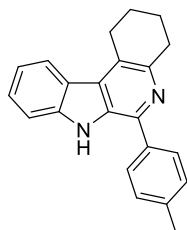

The reaction was conducted with 2-(1*H*-indol-3-yl)cyclohexan-1-one (**1a**, 0.2 mmol, 42.6 mg), 4-methylbenzaldehyde (**2b**, 0.4 mmol, 47.3  $\mu$ L),  $(\text{NH}_4)_3\text{PO}_4 \cdot 3\text{H}_2\text{O}$  (0.2 mmol, 40.6 mg),  $\text{Na}_2\text{CO}_3$  (0.1 mmol, 10.6 mg),  $\text{H}_2\text{O}$  (0.6 mmol, 10.8  $\mu$ L), and  $\text{PhCF}_3$  (0.6 mL). The reaction vessel stirred at 150  $^\circ\text{C}$  for 12 h under oxygen atmosphere. The residue was purified by column chromatography on silica gel (petroleum ether/EtOAc = 10:1) to yield the desired product **3b** as white solid, yield: 54.1 mg (87%), mp 253-256  $^\circ\text{C}$ .

$^1\text{H}$  NMR (400 MHz,  $\text{CDCl}_3$ , ppm):  $\delta$  8.49 (s, 1H), 8.20 (d,  $J = 8.0$  Hz, 1H), 7.77 (d,  $J = 7.9$  Hz, 2H),

7.52 – 7.44 (m, 2H), 7.32 (d,  $J = 7.9$  Hz, 2H), 7.27 (d,  $J = 8.0$  Hz, 1H), 3.39 (t,  $J = 5.8$  Hz, 2H), 3.15 (t,  $J = 5.6$  Hz, 2H), 2.41 (s, 3H), 2.04 – 2.01 (m, 4H).  $^{13}\text{C}$   $\{^1\text{H}\}$  NMR (100 MHz,  $\text{CDCl}_3$ , ppm):  $\delta$  146.6, 140.4, 140.1, 138.2, 135.9, 131.7, 129.7, 128.3, 128.0, 127.3, 125.1, 123.9, 122.6, 119.7, 111.2, 32.7, 27.1, 23.4, 22.8, 21.3. HRMS (ESI)  $m/z$  calcd for  $\text{C}_{22}\text{H}_{21}\text{N}_2^+$   $[\text{M}+\text{H}]^+$  313.1699, found 313.1699.

#### 6-(4-Methoxyphenyl)-2,3,4,7-tetrahydro-1H-indolo[2,3-c]quinolone (3c)

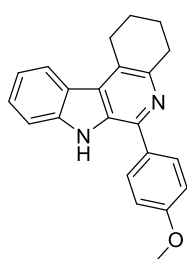

The reaction was conducted with 2-(1H-indol-3-yl)cyclohexan-1-one (**1a**, 0.2 mmol, 42.6 mg), 4-methoxybenzaldehyde (**2c**, 0.4 mmol, 48.6  $\mu\text{L}$ ),  $(\text{NH}_4)_3\text{PO}_4 \cdot 3\text{H}_2\text{O}$  (0.2 mmol, 40.6 mg),  $\text{Na}_2\text{CO}_3$  (0.1 mmol, 10.6 mg),  $\text{H}_2\text{O}$  (0.6 mmol, 10.8  $\mu\text{L}$ ), and  $\text{PhCF}_3$  (0.6 mL). The reaction vessel stirred at 150  $^\circ\text{C}$  for 12 h under oxygen atmosphere. The residue was purified by column chromatography on silica gel (petroleum ether/EtOAc = 5:1) to yield the desired product **3c** as white solid, yield: 54.8 mg (84%), mp 233-236  $^\circ\text{C}$ .

$^1\text{H}$  NMR (400 MHz,  $\text{CDCl}_3$ , ppm):  $\delta$  8.57 (s, 1H), 8.19 (d,  $J = 8.0$  Hz, 1H), 7.80 (d,  $J = 8.7$  Hz, 2H), 7.51 – 7.43 (m, 2H), 7.28 – 7.23 (m, 1H), 7.00 (d,  $J = 8.7$  Hz, 2H), 3.81 (s, 3H), 3.38 (t,  $J = 5.5$  Hz, 2H), 3.14 (t,  $J = 5.4$  Hz, 2H), 2.03 – 2.00 (m, 4H).  $^{13}\text{C}$   $\{^1\text{H}\}$  NMR (100 MHz,  $\text{CDCl}_3$ , ppm):  $\delta$  159.7, 146.5, 140.5, 139.8, 131.6, 131.3, 129.4, 128.2, 127.3, 124.8, 123.9, 122.6, 119.7, 114.4, 111.2, 55.3, 32.6, 27.1, 23.4, 22.8. HRMS (ESI)  $m/z$  calcd for  $\text{C}_{22}\text{H}_{21}\text{N}_2\text{O}^+$   $[\text{M}+\text{H}]^+$  329.1648, found 329.1655.

#### 6-(4-(tert-Butyl)phenyl)-2,3,4,7-tetrahydro-1H-indolo[2,3-c]quinolone (3d)

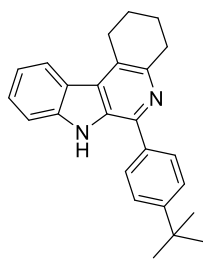

The reaction was conducted with 2-(1H-indol-3-yl)cyclohexan-1-one (**1a**, 0.2 mmol, 42.6 mg), 4-*tert*-butylbenzaldehyde (**2d**, 0.4 mmol, 66.5  $\mu\text{L}$ ),  $(\text{NH}_4)_3\text{PO}_4 \cdot 3\text{H}_2\text{O}$  (0.2 mmol, 40.6 mg),  $\text{Na}_2\text{CO}_3$  (0.1 mmol, 10.6 mg),  $\text{H}_2\text{O}$  (0.6 mmol, 10.8  $\mu\text{L}$ ), and  $\text{PhCF}_3$  (0.6 mL). The reaction vessel stirred at 150  $^\circ\text{C}$  for 12 h under oxygen atmosphere. The residue was purified by column chromatography on silica gel (petroleum ether/EtOAc = 10:1) to yield the desired product **3d** as yellow solid, yield: 58.7 mg (83%), mp 111-114  $^\circ\text{C}$ .

$^1\text{H}$  NMR (400 MHz,  $\text{CDCl}_3$ , ppm):  $\delta$  8.53 (s, 1H), 8.20 (d,  $J = 8.0$  Hz, 1H), 7.81 (d,  $J = 8.3$  Hz, 2H), 7.53 (d,  $J = 8.4$  Hz, 2H), 7.51 – 7.42 (m, 2H), 7.27 (d,  $J = 7.1$  Hz, 1H), 3.39 (t,  $J = 5.8$  Hz, 2H), 3.16

(t,  $J = 5.6$  Hz, 2H), 2.04 – 2.01 (m, 4H), 1.35 (s, 9H).  $^{13}\text{C}$   $\{^1\text{H}\}$  NMR (100 MHz,  $\text{CDCl}_3$ , ppm):  $\delta$  151.4, 146.6, 140.5, 140.0, 135.8, 131.7, 128.3, 127.8, 127.3, 126.0, 125.1, 123.9, 122.6, 119.7, 111.2, 34.7, 32.6, 31.3, 27.1, 23.4, 22.8. HRMS (ESI)  $m/z$  calcd for  $\text{C}_{25}\text{H}_{27}\text{N}_2^+$   $[\text{M}+\text{H}]^+$  355.2169, found 355.2178.

### 6-([1,1'-Biphenyl]-4-yl)-2,3,4,7-tetrahydro-1H-indolo[2,3-c]quinolone (3e)

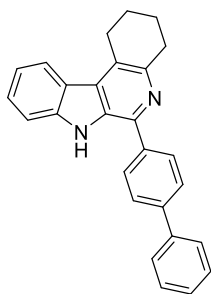

The reaction was conducted with 2-(1*H*-indol-3-yl)cyclohexan-1-one (**1a**, 0.2 mmol, 42.6 mg), 4-biphenylcarboxaldehyde (**2e**, 0.4 mmol, 72.9 mg),  $(\text{NH}_4)_3\text{PO}_4 \cdot 3\text{H}_2\text{O}$  (0.2 mmol, 40.6 mg),  $\text{Na}_2\text{CO}_3$  (0.1 mmol, 10.6 mg),  $\text{H}_2\text{O}$  (0.6 mmol, 10.8  $\mu\text{L}$ ), and  $\text{PhCF}_3$  (0.6 mL). The reaction vessel stirred at 150  $^\circ\text{C}$  for 12 h under oxygen atmosphere. The residue was purified by column chromatography on silica gel (petroleum ether/EtOAc = 10:1) to yield the

desired product **3e** as yellow solid, yield: 56.0 mg (75%), mp 214-217  $^\circ\text{C}$ .

$^1\text{H}$  NMR (400 MHz,  $\text{CDCl}_3$ , ppm):  $\delta$  8.59 (s, 1H), 8.22 (d,  $J = 8.0$  Hz, 1H), 7.96 (d,  $J = 8.3$  Hz, 2H), 7.73 (d,  $J = 8.3$  Hz, 2H), 7.62 (d,  $J = 7.3$  Hz, 2H), 7.51 (t,  $J = 7.6$  Hz, 2H), 7.45 (t,  $J = 7.5$  Hz, 2H), 7.37 (t,  $J = 7.3$  Hz, 1H), 7.28 (t,  $J = 8.0$  Hz, 1H), 3.41 (t,  $J = 5.8$  Hz, 2H), 3.18 (t,  $J = 5.8$  Hz, 2H), 2.05 – 2.02 (m, 4H).  $^{13}\text{C}$   $\{^1\text{H}\}$  NMR (100 MHz,  $\text{DMSO}-d_6$ , ppm):  $\delta$  145.1, 141.3, 139.8, 138.5, 137.6, 131.5, 129.1, 128.9, 127.8, 127.7, 127.3, 126.9, 126.7, 124.7, 123.5, 121.4, 119.4, 119.4, 112.3, 32.3, 26.5, 23.1, 22.5. HRMS (ESI)  $m/z$  calcd for  $\text{C}_{27}\text{H}_{23}\text{N}_2^+$   $[\text{M}+\text{H}]^+$  375.1856, found 375.1866.

### 6-(4-Chlorophenyl)-2,3,4,7-tetrahydro-1H-indolo[2,3-c]quinolone (3f)

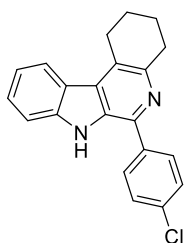

The reaction was conducted with 2-(1*H*-indol-3-yl)cyclohexan-1-one (**1a**, 0.2 mmol, 42.6 mg), 4-chlorobenzaldehyde (**2f**, 0.4 mmol, 56.2 mg),  $(\text{NH}_4)_3\text{PO}_4 \cdot 3\text{H}_2\text{O}$  (0.2 mmol, 40.6 mg),  $\text{Na}_2\text{CO}_3$  (0.1 mmol, 10.6 mg),  $\text{H}_2\text{O}$  (0.6 mmol, 10.8  $\mu\text{L}$ ), and  $\text{PhCF}_3$  (0.6 mL). The reaction vessel stirred at 150  $^\circ\text{C}$  for 12 h under oxygen atmosphere. The residue was purified by column

chromatography on silica gel (petroleum ether/EtOAc = 20:1) to yield the desired product **3f** as white solid, yield: 54.4 mg (82%), mp 197-199  $^\circ\text{C}$ .

$^1\text{H}$  NMR (400 MHz,  $\text{CDCl}_3$ , ppm):  $\delta$  8.61 (s, 1H), 8.20 (d,  $J = 8.0$  Hz, 1H), 7.77 (d,  $J = 8.4$  Hz, 2H),

7.51 (t, 1H), 7.45 (d,  $J = 7.6$  Hz, 1H), 7.40 (d,  $J = 8.4$  Hz, 2H), 7.28 (d,  $J = 7.2$  Hz, 1H), 3.39 (t,  $J = 5.0$  Hz, 2H), 3.13 (t,  $J = 5.7$  Hz, 2H), 2.05 – 1.98 (m, 4H).  $^{13}\text{C}$  { $^1\text{H}$ } NMR (100 MHz,  $\text{CDCl}_3$ , ppm):  $\delta$  146.8, 140.6, 138.5, 137.1, 134.2, 131.7, 129.4, 129.1, 128.7, 127.6, 125.8, 124.0, 122.5, 119.9, 111.3, 32.5, 27.1, 23.3, 22.7. HRMS (ESI)  $m/z$  calcd for  $\text{C}_{21}\text{H}_{18}\text{ClN}_2^+$  [ $\text{M}+\text{H}$ ] $^+$  333.1153, found 333.1160.

#### 6-(4-(Trifluoromethoxy)phenyl)-2,3,4,7-tetrahydro-1H-indolo[2,3-c]quinolone (3g)

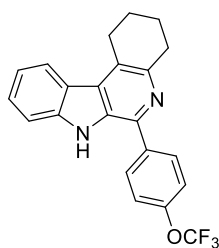

The reaction was conducted with 2-(1H-indol-3-yl)cyclohexan-1-one (**1a**, 0.2 mmol, 42.6 mg), 4-trifluoromethoxybenzaldehyde (**2g**, 0.4 mmol, 57.1  $\mu\text{L}$ ),  $(\text{NH}_4)_3\text{PO}_4 \cdot 3\text{H}_2\text{O}$  (0.2 mmol, 40.6 mg),  $\text{Na}_2\text{CO}_3$  (0.1 mmol, 10.6 mg),  $\text{H}_2\text{O}$  (0.6 mmol, 10.8  $\mu\text{L}$ ), and  $\text{PhCF}_3$  (0.6 mL). The reaction vessel stirred at 150  $^\circ\text{C}$  for 12 h under oxygen atmosphere. The residue was purified by column chromatography on silica gel (petroleum ether/EtOAc = 10:1) to yield the desired product **3g** as white solid, yield: 61.3 mg (80%), mp 139-142  $^\circ\text{C}$ .

$^1\text{H}$  NMR (400 MHz,  $\text{CDCl}_3$ , ppm):  $\delta$  8.55 (s, 1H), 8.20 (d,  $J = 8.0$  Hz, 1H), 7.88 (d,  $J = 8.6$  Hz, 2H), 7.50 (t,  $J = 7.6$  Hz, 1H), 7.44 (d,  $J = 8.0$  Hz, 1H), 7.33 – 7.25 (m, 3H), 3.39 (t,  $J = 5.6$  Hz, 2H), 3.14 (t,  $J = 5.3$  Hz, 2H), 2.06 – 1.99 (m, 4H).  $^{13}\text{C}$  { $^1\text{H}$ } NMR (100 MHz,  $\text{CDCl}_3$ , ppm):  $\delta$  149.1, 146.9, 140.6, 138.3, 137.5, 131.7, 129.6, 128.7, 127.6, 125.9, 124.0, 122.5, 121.5, 120.4 (q,  $J = 255.8$  Hz), 120.0, 111.3, 32.6, 27.1, 23.3, 22.7.  $^{19}\text{F}$  NMR (471 MHz,  $\text{CDCl}_3$ , ppm)  $\delta$  -62.5. HRMS (ESI)  $m/z$  calcd for  $\text{C}_{22}\text{H}_{18}\text{F}_3\text{N}_2\text{O}^+$  [ $\text{M}+\text{H}$ ] $^+$  383.1366, found 383.1375.

#### N,N-Dimethyl-4-(2,3,4,7-tetrahydro-1H-indolo[2,3-c]quinolin-6-yl)aniline (3h)

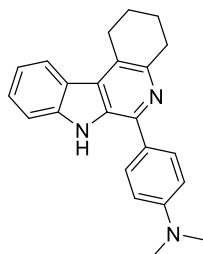

The reaction was conducted with 2-(1H-indol-3-yl)cyclohexan-1-one (**1a**, 0.2 mmol, 42.6 mg), *p*-dimethylaminobenzaldehyde (**2h**, 0.4 mmol, 59.7 mg),  $(\text{NH}_4)_3\text{PO}_4 \cdot 3\text{H}_2\text{O}$  (0.2 mmol, 40.6 mg),  $\text{Na}_2\text{CO}_3$  (0.1 mmol, 10.6 mg),  $\text{H}_2\text{O}$  (0.6 mmol, 10.8  $\mu\text{L}$ ), and  $\text{PhCF}_3$  (0.6 mL). The reaction vessel stirred at 150  $^\circ\text{C}$  for 12 h under oxygen atmosphere. The residue was purified by column chromatography on silica gel (petroleum ether/EtOAc = 3:1) to yield the desired product **3h** as white solid, yield: 29.0 mg (43%), mp 216-219  $^\circ\text{C}$ .

$^1\text{H}$  NMR (400 MHz,  $\text{CDCl}_3$ , ppm):  $\delta$  8.62 (s, 1H), 8.19 (d,  $J = 8.0$  Hz, 1H), 7.78 (d,  $J = 8.7$  Hz, 2H), 7.50 – 7.44 (m, 2H), 7.27 – 7.22 (m, 1H), 6.81 (d,  $J = 8.7$  Hz, 2H), 3.37 (t,  $J = 5.4$  Hz, 2H), 3.15 (t,

$J = 5.4$  Hz, 2H), 2.97 (s, 6H), 2.03 – 1.99 (m, 4H).  $^{13}\text{C}$  { $^1\text{H}$ } NMR (100 MHz,  $\text{CDCl}_3$ , ppm):  $\delta$  150.5, 146.2, 140.5, 140.4, 131.6, 129.0, 128.1, 127.1, 126.5, 124.1, 123.9, 122.6, 119.6, 112.7, 111.2, 40.4, 32.5, 27.0, 23.4, 22.8. HRMS (ESI)  $m/z$  calcd for  $\text{C}_{23}\text{H}_{24}\text{N}_3^+$  [ $\text{M}+\text{H}$ ] $^+$  342.1965, found 342.1970.

### 6-(*m*-Tolyl)-2,3,4,7-tetrahydro-1*H*-indolo[2,3-*c*]quinolone (3i)

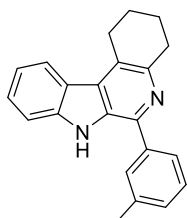

The reaction was conducted with 2-(1*H*-indol-3-yl)cyclohexan-1-one (**1a**, 0.2 mmol, 42.6 mg), 3-methylbenzaldehyde (**2i**, 0.4 mmol, 47.2  $\mu\text{L}$ ),  $(\text{NH}_4)_3\text{PO}_4 \cdot 3\text{H}_2\text{O}$  (0.2 mmol, 40.6 mg),  $\text{Na}_2\text{CO}_3$  (0.1 mmol, 10.6 mg),  $\text{H}_2\text{O}$  (0.6 mmol, 10.8  $\mu\text{L}$ ), and  $\text{PhCF}_3$  (0.6 mL). The reaction vessel stirred at 150  $^\circ\text{C}$  for 12 h under oxygen atmosphere. The residue was purified by column chromatography on silica gel (petroleum ether/EtOAc = 20:1) to yield the desired product **3i** as white solid, yield: 50.6 mg (81%), mp 170-173  $^\circ\text{C}$ .

$^1\text{H}$  NMR (400 MHz,  $\text{CDCl}_3$ , ppm):  $\delta$  8.50 (s, 1H), 8.20 (d,  $J = 8.0$  Hz, 1H), 7.69 (s, 1H), 7.65 (d,  $J = 7.6$  Hz, 1H), 7.52 – 7.44 (m, 2H), 7.39 (t,  $J = 7.6$  Hz, 1H), 7.28 – 7.21 (m, 2H), 3.39 (t,  $J = 5.2$  Hz, 2H), 3.16 (t,  $J = 5.1$  Hz, 2H), 2.43 (s, 3H), 2.03 (s, 4H).  $^{13}\text{C}$  { $^1\text{H}$ } NMR (100 MHz,  $\text{CDCl}_3$ , ppm):  $\delta$  146.6, 140.4, 140.1, 138.9, 138.6, 131.7, 129.1, 129.0, 128.8, 128.3, 127.4, 125.3, 125.0, 124.0, 122.6, 119.7, 111.2, 32.6, 27.1, 23.4, 22.8, 21.5. HRMS (ESI)  $m/z$  calcd for  $\text{C}_{22}\text{H}_{21}\text{N}_2^+$  [ $\text{M}+\text{H}$ ] $^+$  313.1699, found 313.1699.

### 6-(3-Chlorophenyl)-2,3,4,7-tetrahydro-1*H*-indolo[2,3-*c*]quinolone (3j)

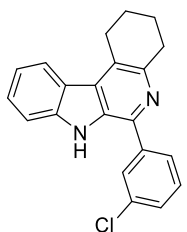

The reaction was conducted with 2-(1*H*-indol-3-yl)cyclohexan-1-one (**1a**, 0.2 mmol, 42.6 mg), 3-chlorobenzaldehyde (**2j**, 0.4 mmol, 45.3  $\mu\text{L}$ ),  $(\text{NH}_4)_3\text{PO}_4 \cdot 3\text{H}_2\text{O}$  (0.2 mmol, 40.6 mg),  $\text{Na}_2\text{CO}_3$  (0.1 mmol, 10.6 mg),  $\text{H}_2\text{O}$  (0.6 mmol, 10.8  $\mu\text{L}$ ), and  $\text{PhCF}_3$  (0.6 mL). The reaction vessel stirred at 150  $^\circ\text{C}$  for 12 h under oxygen atmosphere. The residue was purified by column chromatography on silica gel (petroleum ether/EtOAc = 20:1) to yield the desired product **3j** as white solid, yield: 57.0 mg (86%), mp 149-152  $^\circ\text{C}$ .

$^1\text{H}$  NMR (400 MHz,  $\text{CDCl}_3$ , ppm):  $\delta$  8.55 (s, 1H), 8.20 (d,  $J = 7.9$  Hz, 1H), 7.86 (s, 1H), 7.74 (d,  $J = 7.3$  Hz, 1H), 7.53 – 7.45 (m, 2H), 7.42 – 7.34 (m, 2H), 7.30 – 7.24 (m, 1H), 3.39 (t,  $J = 5.8$  Hz, 2H), 3.15 (t,  $J = 5.6$  Hz, 2H), 2.03 (s, 4H).  $^{13}\text{C}$  { $^1\text{H}$ } NMR (100 MHz,  $\text{CDCl}_3$ , ppm):  $\delta$  146.9, 140.5, 138.2, 135.0, 131.7, 130.2, 128.7, 128.3, 128.3, 127.6, 126.2, 126.0, 124.0, 122.5, 120.0, 111.3, 32.6,

27.1, 23.3, 22.7. HRMS (ESI)  $m/z$  calcd for  $C_{21}H_{18}ClN_2^+$   $[M+H]^+$  333.1153, found 333.1160.

### 6-(2-Chlorophenyl)-2,3,4,7-tetrahydro-1H-indolo[2,3-c]quinolone (3k)

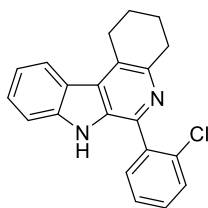

The reaction was conducted with 2-(1H-indol-3-yl)cyclohexan-1-one (**1a**, 0.2 mmol, 42.6 mg), 2-chlorobenzaldehyde (**2k**, 0.4 mmol, 45.1  $\mu$ L),  $(NH_4)_3PO_4 \cdot 3H_2O$  (0.2 mmol, 40.6 mg),  $Na_2CO_3$  (0.1 mmol, 10.6 mg),  $H_2O$  (0.6 mmol, 10.8  $\mu$ L), and  $PhCF_3$  (0.6 mL). The reaction vessel stirred at 150  $^\circ$ C for 12 h under oxygen atmosphere. The residue was purified by column chromatography on silica gel (petroleum ether/EtOAc = 5:1) to yield the desired product **3k** as white solid, yield: 52.3 mg (79%), mp 219-222  $^\circ$ C.

$^1H$  NMR (400 MHz,  $CDCl_3$ , ppm):  $\delta$  8.21 (d,  $J$  = 8.0 Hz, 1H), 8.06 (s, 1H), 7.59 – 7.56 (m, 1H), 7.55 – 7.52 (m, 1H), 7.49 (d,  $J$  = 7.4 Hz, 1H), 7.44 – 7.38 (m, 3H), 7.29 – 7.24 (m, 1H), 3.43 (t,  $J$  = 5.8 Hz, 2H), 3.14 (t,  $J$  = 5.6 Hz, 2H), 2.08 – 2.01 (m, 4H).  $^{13}C$   $\{^1H\}$  NMR (100 MHz,  $CDCl_3$ , ppm):  $\delta$  146.5, 140.5, 138.1, 137.2, 132.9, 132.2, 132.2, 129.9, 129.8, 128.0, 127.5, 127.4, 126.0, 124.0, 122.4, 119.8, 111.2, 32.5, 27.1, 23.3, 22.7. HRMS (ESI)  $m/z$  calcd for  $C_{21}H_{18}ClN_2^+$   $[M+H]^+$  333.1153, found 333.1160.

### 2-(2,3,4,7-Tetrahydro-1H-indolo[2,3-c]quinolin-6-yl)phenol (3l)

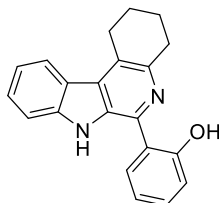

The reaction was conducted with 2-(1H-indol-3-yl)cyclohexan-1-one (**1a**, 0.2 mmol, 42.6 mg), 2-hydroxybenzaldehyde (**2l**, 0.4 mmol, 42.6  $\mu$ L),  $(NH_4)_3PO_4 \cdot 3H_2O$  (0.2 mmol, 40.6 mg),  $Na_2CO_3$  (0.1 mmol, 10.6 mg),  $H_2O$  (0.6 mmol, 10.8  $\mu$ L), and  $PhCF_3$  (0.6 mL). The reaction vessel stirred at 150  $^\circ$ C for 12 h under oxygen atmosphere. The residue was purified by column chromatography on silica gel (petroleum ether/EtOAc = 10:1) to yield the desired product **3l** as yellow solid, yield: 40.0 mg (64%), mp 226-229  $^\circ$ C.

$^1H$  NMR (400 MHz,  $DMSO-d_6$ , ppm):  $\delta$  14.15 (s, 1H), 11.63 (s, 1H), 8.28 (d,  $J$  = 8.0 Hz, 1H), 8.14 (d,  $J$  = 7.8 Hz, 1H), 7.78 (d,  $J$  = 8.2 Hz, 1H), 7.63 (t,  $J$  = 7.7 Hz, 1H), 7.40 (t,  $J$  = 7.6 Hz, 1H), 7.34 (t,  $J$  = 7.6 Hz, 1H), 7.11 (t,  $J$  = 7.5 Hz, 1H), 7.06 (d,  $J$  = 8.1 Hz, 1H), 3.40 (d,  $J$  = 5.8 Hz, 2H), 3.07 (t,  $J$  = 5.4 Hz, 2H), 2.06 – 1.99 (m, 4H).  $^{13}C$   $\{^1H\}$  NMR (100 MHz,  $CDCl_3$ , ppm):  $\delta$  158.9, 143.4, 140.8, 138.6, 130.4, 130.1, 129.7, 127.8, 126.4, 125.5, 123.9, 122.0, 120.2, 119.9, 118.9, 118.4, 111.6, 31.5, 26.8, 22.8, 22.5. HRMS (ESI)  $m/z$  calcd for  $C_{21}H_{19}N_2O^+$   $[M+H]^+$  315.1492, found



315.1502.

**6-(2,4-Dichlorophenyl)-2,3,4,7-tetrahydro-1H-indolo[2,3-c]quinolone (3m)**

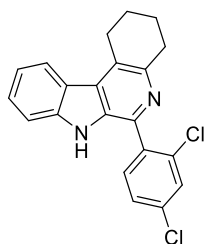

The reaction was conducted with 2-(1*H*-indol-3-yl)cyclohexan-1-one (**1a**, 0.2 mmol, 42.6 mg), 2,4-dichlorobenzaldehyde (**2m**, 0.4 mmol, 70.0 mg), (NH<sub>4</sub>)<sub>3</sub>PO<sub>4</sub>·3H<sub>2</sub>O (0.2 mmol, 40.6 mg), Na<sub>2</sub>CO<sub>3</sub> (0.1 mmol, 10.6 mg), H<sub>2</sub>O (0.6 mmol, 10.8 μL), and PhCF<sub>3</sub> (0.6 mL). The reaction vessel stirred at 150 °C for 12 h under oxygen atmosphere. The residue was purified by column chromatography on silica gel (petroleum ether/EtOAc = 20:1) to yield the desired product **3m** as white solid, yield: 66.4 mg (91%), mp 260-263 °C.

<sup>1</sup>H NMR (400 MHz, CDCl<sub>3</sub>, ppm): δ 8.22 (d, *J* = 8.0 Hz, 1H), 8.04 (s, 1H), 7.57 – 7.49 (m, 3H), 7.45 (d, *J* = 8.1 Hz, 1H), 7.39 (d, *J* = 8.2 Hz, 1H), 7.28 (t, *J* = 8.0 Hz, 1H), 3.43 (t, *J* = 5.6 Hz, 2H), 3.14 (t, *J* = 5.5 Hz, 2H), 2.08 – 2.04 (m, 4H). <sup>13</sup>C {<sup>1</sup>H} NMR (100 MHz, CDCl<sub>3</sub>, ppm): δ 146.6, 146.0, 136.9, 135.7, 135.1, 133.6, 132.9, 132.2, 129.6, 128.2, 127.7, 127.6, 126.4, 124.0, 122.3, 119.9, 111.3, 32.4, 27.1, 23.2, 22.6. HRMS (ESI) *m/z* calcd for C<sub>21</sub>H<sub>17</sub>Cl<sub>2</sub>N<sub>2</sub><sup>+</sup> [M+H]<sup>+</sup> 367.0763, found 367.0775.

**6-(2-Chloro-4-methylphenyl)-2,3,4,7-tetrahydro-1H-indolo[2,3-c]quinolone (3n)**

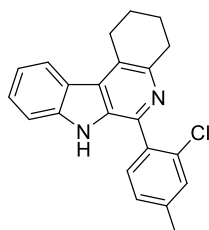

The reaction was conducted with 2-(1*H*-indol-3-yl)cyclohexan-1-one (**1a**, 0.2 mmol, 42.6 mg), 2-chloro-4-methylbenzaldehyde (**2n**, 0.4 mmol, 61.8 mg), (NH<sub>4</sub>)<sub>3</sub>PO<sub>4</sub>·3H<sub>2</sub>O (0.2 mmol, 40.6 mg), Na<sub>2</sub>CO<sub>3</sub> (0.1 mmol, 10.6 mg), H<sub>2</sub>O (0.6 mmol, 10.8 μL), and PhCF<sub>3</sub> (0.6 mL). The reaction vessel stirred at 150 °C for 12 h under oxygen atmosphere. The residue was purified by column chromatography on silica gel (petroleum ether/EtOAc = 10:1) to yield the desired product **3n** as yellow solid, yield: 66.3 mg (96%), mp 293-295 °C.

<sup>1</sup>H NMR (400 MHz, CDCl<sub>3</sub>, ppm): δ 8.21 (d, *J* = 8.0 Hz, 1H), 8.03 (s, 1H), 7.52 – 7.42 (m, 3H), 7.37 (s, 1H), 7.29 – 7.25 (m, 1H), 7.22 (d, *J* = 7.6 Hz, 1H), 3.43 (t, *J* = 5.6 Hz, 2H), 3.16 (t, *J* = 5.2 Hz, 2H), 2.42 (s, 3H), 2.06 – 2.01 (m, 4H). <sup>13</sup>C {<sup>1</sup>H} NMR (100 MHz, CDCl<sub>3</sub>, ppm): δ 146.4, 140.5, 140.2, 138.3, 134.2, 132.5, 132.3, 131.8, 130.3, 128.2, 127.9, 127.4, 125.8, 123.9, 122.4, 119.7, 111.2, 32.5, 27.1, 23.3, 22.7, 21.0. HRMS (ESI) *m/z* calcd for C<sub>22</sub>H<sub>20</sub>ClN<sub>2</sub><sup>+</sup> [M+H]<sup>+</sup> 347.1310, found 347.1323.

### 2-Methoxy-4-(2,3,4,7-tetrahydro-1*H*-indolo[2,3-*c*]quinolin-6-yl)phenol (**3o**)

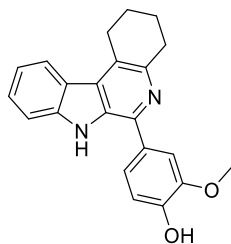

The reaction was conducted with 2-(1*H*-indol-3-yl)cyclohexan-1-one (**1a**, 0.2 mmol, 42.6 mg), 4-hydroxy-3-methoxybenzaldehyde (**2o**, 0.4 mmol, 60.9 mg), (NH<sub>4</sub>)<sub>3</sub>PO<sub>4</sub>·3H<sub>2</sub>O (0.2 mmol, 40.6 mg), Na<sub>2</sub>CO<sub>3</sub> (0.1 mmol, 10.6 mg), H<sub>2</sub>O (0.6 mmol, 10.8 μL), and PhCF<sub>3</sub> (0.6 mL). The reaction vessel stirred at 150 °C for 12 h under oxygen atmosphere. The residue was purified by column chromatography on silica gel (petroleum ether/EtOAc = 2:1) to yield the desired product **3o** as white solid, yield: 29.9 mg (43%).

<sup>1</sup>H NMR (400 MHz, DMSO-*d*<sub>6</sub>, ppm): δ 11.29 (s, 1H), 9.33 (s, 1H), 8.16 (d, *J* = 8.0 Hz, 1H), 7.63 (d, *J* = 8.2 Hz, 1H), 7.52 – 7.46 (m, 2H), 7.38 (d, *J* = 8.1 Hz, 1H), 7.21 (t, *J* = 7.5 Hz, 1H), 6.98 (d, *J* = 8.1 Hz, 1H), 3.88 (s, 3H), 3.31 (t, *J* = 5.8 Hz, 2H), 3.00 (t, *J* = 5.8 Hz, 2H), 1.96 – 1.90 (m, 4H).  
<sup>13</sup>C {<sup>1</sup>H} NMR (100 MHz, DMSO-*d*<sub>6</sub>, ppm): δ 147.7, 147.1, 144.7, 144.3, 139.6, 131.2, 129.7, 127.6, 127.2, 123.9, 123.5, 121.5, 121.2, 119.3, 115.6, 112.4, 112.3, 55.6, 32.2, 26.5, 23.1, 22.6.  
HRMS (ESI) *m/z* calcd for C<sub>22</sub>H<sub>21</sub>N<sub>2</sub>O<sub>2</sub><sup>+</sup> [M+H]<sup>+</sup> 345.1598, found 345.1608.

### 6-(Naphthalen-2-yl)-2,3,4,7-tetrahydro-1*H*-indolo[2,3-*c*]quinolone (**3p**)

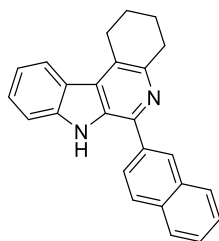

The reaction was conducted with 2-(1*H*-indol-3-yl)cyclohexan-1-one (**1a**, 0.2 mmol, 42.6 mg), 2-naphthaldehyde (**2p**, 0.4 mmol, 62.5 mg), (NH<sub>4</sub>)<sub>3</sub>PO<sub>4</sub>·3H<sub>2</sub>O (0.2 mmol, 40.6 mg), Na<sub>2</sub>CO<sub>3</sub> (0.1 mmol, 10.6 mg), H<sub>2</sub>O (0.6 mmol, 10.8 μL), and PhCF<sub>3</sub> (0.6 mL). The reaction vessel stirred at 150 °C for 12 h under oxygen atmosphere. The residue was purified by column chromatography on silica gel (petroleum ether/EtOAc = 10:1) to yield the desired product **3p** as yellow solid, yield: 56.0 mg (80%), mp 179-181 °C.

<sup>1</sup>H NMR (500 MHz, CDCl<sub>3</sub>, ppm): δ 8.62 (s, 1H), 8.30 (s, 1H), 8.21 (d, *J* = 8.0 Hz, 1H), 8.00 (d, *J* = 8.4 Hz, 1H), 7.94 (d, *J* = 8.4 Hz, 1H), 7.89 – 7.84 (m, 2H), 7.53 – 7.47 (m, 4H), 7.28 (t, *J* = 7.4 Hz, 1H), 3.40 (t, *J* = 5.5 Hz, 2H), 3.19 (t, *J* = 5.5 Hz, 2H), 2.06 – 2.03 (m, 4H). <sup>13</sup>C {<sup>1</sup>H} NMR (100 MHz, CDCl<sub>3</sub>, ppm): δ 146.8, 140.6, 139.8, 136.1, 133.4, 133.1, 132.0, 128.8, 128.5, 128.2, 127.7, 127.4, 127.1, 126.3, 126.1, 125.4, 124.0, 122.6, 119.8, 111.3, 32.7, 27.1, 23.4, 22.8. HRMS (ESI) *m/z* calcd for C<sub>25</sub>H<sub>21</sub>N<sub>2</sub><sup>+</sup> [M+H]<sup>+</sup> 349.1699, found 349.1716.

### 6-(Quinolin-4-yl)-2,3,4,7-tetrahydro-1H-indolo[2,3-c]quinolone (3q)

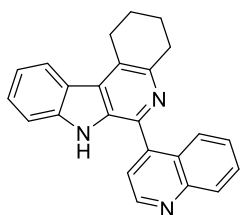

The reaction was conducted with 2-(1*H*-indol-3-yl)cyclohexan-1-one (**1a**, 0.2 mmol, 42.6 mg), quinoline-4-carbaldehyde (**2q**, 0.4 mmol, 62.9 mg), (NH<sub>4</sub>)<sub>3</sub>PO<sub>4</sub>·3H<sub>2</sub>O (0.2 mmol, 40.6 mg), Na<sub>2</sub>CO<sub>3</sub> (0.1 mmol, 10.6 mg), H<sub>2</sub>O (0.6 mmol, 10.8 μL), and PhCF<sub>3</sub> (0.6 mL). The reaction vessel stirred at 150 °C for 12 h under oxygen atmosphere. The residue was purified by column chromatography on silica gel (petroleum ether/EtOAc = 1:1) to yield the desired product **3q** as white solid, yield: 33.5 mg (48%), mp 294-296 °C.

<sup>1</sup>H NMR (400 MHz, CDCl<sub>3</sub>, ppm): δ 10.89 (s, 1H), 8.45 (d, *J* = 4.3 Hz, 1H), 8.32 (d, *J* = 8.0 Hz, 1H), 7.82 (d, *J* = 8.3 Hz, 1H), 7.73 (d, *J* = 8.3 Hz, 1H), 7.65 (d, *J* = 8.1 Hz, 1H), 7.58 (t, *J* = 7.6 Hz, 1H), 7.47 – 7.43 (m, 2H), 7.35 (q, *J* = 7.7 Hz, 2H), 3.54 (t, *J* = 5.1 Hz, 2H), 3.20 (t, *J* = 5.5 Hz, 2H), 2.16 – 2.07 (m, 4H). <sup>13</sup>C {<sup>1</sup>H} NMR (100 MHz, CDCl<sub>3</sub>, ppm): δ 148.6, 147.3, 146.2, 145.0, 141.7, 136.7, 133.5, 129.3, 128.5, 128.4, 127.7, 127.1, 126.6, 126.5, 125.9, 124.0, 122.1, 122.0, 119.7, 111.9, 32.6, 27.3, 23.4, 22.8. HRMS (ESI) *m/z* calcd for C<sub>24</sub>H<sub>20</sub>N<sub>3</sub><sup>+</sup> [M+H]<sup>+</sup> 350.1652, found 350.1663.

### 6-(Pyridin-4-yl)-2,3,4,7-tetrahydro-1H-indolo[2,3-c]quinolone (3r)

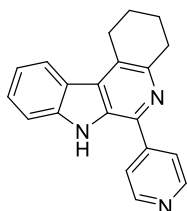

The reaction was conducted with 2-(1*H*-indol-3-yl)cyclohexan-1-one (**1a**, 0.2 mmol, 42.6 mg), 4-pyridinecarboxaldehyde (**2r**, 0.4 mmol, 37.7 μL), (NH<sub>4</sub>)<sub>3</sub>PO<sub>4</sub>·3H<sub>2</sub>O (0.2 mmol, 40.6 mg), Na<sub>2</sub>CO<sub>3</sub> (0.1 mmol, 10.6 mg), H<sub>2</sub>O (0.6 mmol, 10.8 μL), and PhCF<sub>3</sub> (0.6 mL). The reaction vessel stirred at 150 °C for 12 h under oxygen atmosphere. The residue was purified by column chromatography on silica gel (petroleum ether/EtOAc = 1:1) to yield the desired product **3r** as white solid, yield: 25.8 mg (43%), mp 278-280 °C.

<sup>1</sup>H NMR (400 MHz, CDCl<sub>3</sub>, ppm): δ 9.76 (s, 1H), 8.61 (d, *J* = 5.6 Hz, 2H), 8.22 (d, *J* = 8.0 Hz, 1H), 7.83 (d, *J* = 5.8 Hz, 2H), 7.54 (d, *J* = 3.8 Hz, 2H), 7.32 – 7.27 (m, 1H), 3.43 (t, *J* = 5.8 Hz, 2H), 3.17 (t, *J* = 5.6 Hz, 2H), 2.06 – 2.02 (m, 4H). <sup>13</sup>C {<sup>1</sup>H} NMR (100 MHz, CDCl<sub>3</sub>, ppm): δ 149.9, 147.0, 146.7, 141.1, 136.4, 132.2, 129.2, 127.9, 127.1, 124.0, 123.1, 122.2, 120.1, 111.6, 32.6, 27.2, 23.3, 22.7. HRMS (ESI) *m/z* calcd for C<sub>20</sub>H<sub>18</sub>N<sub>3</sub><sup>+</sup> [M+H]<sup>+</sup> 300.1495, found 300.1508.

### 6-(Pyridin-2-yl)-2,3,4,7-tetrahydro-1H-indolo[2,3-c]quinolone (3s)

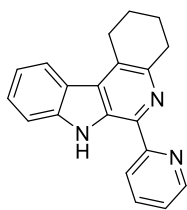

The reaction was conducted with 2-(1*H*-indol-3-yl)cyclohexan-1-one (**1a**, 0.2 mmol, 42.6 mg), 2-pyridinecarboxaldehyde (**2s**, 0.4 mmol, 38.0  $\mu$ L),  $(\text{NH}_4)_3\text{PO}_4 \cdot 3\text{H}_2\text{O}$  (0.2 mmol, 40.6 mg),  $\text{Na}_2\text{CO}_3$  (0.1 mmol, 10.6 mg),  $\text{H}_2\text{O}$  (0.6 mmol, 10.8  $\mu$ L), and  $\text{PhCF}_3$  (0.6 mL). The reaction vessel stirred at 150

$^\circ\text{C}$  for 12 h under oxygen atmosphere. The residue was purified by column chromatography on silica gel (petroleum ether/EtOAc = 10:1) to yield the desired product **3s** as white solid, yield: 19.5 mg (33%), mp 225-227  $^\circ\text{C}$ .

$^1\text{H}$  NMR (400 MHz,  $\text{CDCl}_3$ , ppm):  $\delta$  11.22 (s, 1H), 8.74 (t,  $J = 7.5$  Hz, 2H), 8.20 (d,  $J = 7.9$  Hz, 1H), 7.85 (t,  $J = 7.9$  Hz, 1H), 7.60 (d,  $J = 8.1$  Hz, 1H), 7.53 (t,  $J = 7.6$  Hz, 1H), 7.29 – 7.22 (m, 2H), 3.42 (t,  $J = 5.2$  Hz, 2H), 3.17 (t,  $J = 5.6$  Hz, 2H), 2.04 (p,  $J = 3.2$  Hz, 4H).  $^{13}\text{C}$   $\{^1\text{H}\}$  NMR (100 MHz,  $\text{CDCl}_3$ , ppm):  $\delta$  158.3, 148.2, 145.6, 140.7, 136.7, 134.8, 133.2, 128.9, 127.6, 127.3, 123.8, 122.4, 121.8, 121.0, 119.3, 111.6, 32.9, 27.3, 23.5, 22.9. HRMS (ESI)  $m/z$  calcd for  $\text{C}_{20}\text{H}_{18}\text{N}_3^+$   $[\text{M}+\text{H}]^+$  300.1495, found 300.1508.

#### 6-(Furan-2-yl)-2,3,4,7-tetrahydro-1*H*-indolo[2,3-*c*]quinolone (**3t**)

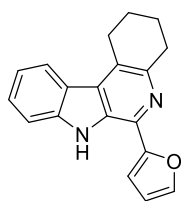

The reaction was conducted with 2-(1*H*-indol-3-yl)cyclohexan-1-one (**1a**, 0.2 mmol, 42.6 mg), 2-furaldehyde (**2t**, 0.4 mmol, 33.1  $\mu$ L),  $(\text{NH}_4)_3\text{PO}_4 \cdot 3\text{H}_2\text{O}$  (0.2 mmol, 40.6 mg),  $\text{Na}_2\text{CO}_3$  (0.1 mmol, 10.6 mg),  $\text{H}_2\text{O}$  (0.6 mmol, 10.8  $\mu$ L), and  $\text{PhCF}_3$  (0.6 mL). The reaction vessel stirred at 150  $^\circ\text{C}$  for 12 h under oxygen

atmosphere. The residue was purified by column chromatography on silica gel (petroleum ether/EtOAc = 10:1) to yield the desired product **3t** as yellow solid, yield: 35.9 mg (62%), mp 125-128  $^\circ\text{C}$ .

$^1\text{H}$  NMR (400 MHz,  $\text{CDCl}_3$ , ppm):  $\delta$  9.30 (s, 1H), 8.15 (d,  $J = 8.0$  Hz, 1H), 7.64 (s, 1H), 7.54 – 7.51 (m, 2H), 7.27 – 7.22 (m, 2H), 6.61 – 6.59 (m, 1H), 3.33 (t,  $J = 5.8$  Hz, 1H), 3.10 (t,  $J = 5.6$  Hz, 1H), 2.02 – 1.95 (m, 4H).  $^{13}\text{C}$   $\{^1\text{H}\}$  NMR (100 MHz,  $\text{CDCl}_3$ , ppm):  $\delta$  154.6, 146.3, 142.3, 140.5, 130.3, 129.8, 128.7, 127.5, 125.6, 123.9, 121.9, 119.7, 112.1, 111.3, 107.8, 32.6, 27.2, 23.3, 22.7. HRMS (ESI)  $m/z$  calcd for  $\text{C}_{19}\text{H}_{17}\text{N}_2\text{O}^+$   $[\text{M}+\text{H}]^+$  289.1335, found 289.1345.

#### 6-(Thiophen-2-yl)-2,3,4,7-tetrahydro-1*H*-indolo[2,3-*c*]quinolone (**3u**)

The reaction was conducted with 2-(1*H*-indol-3-yl)cyclohexan-1-one (**1a**, 0.2 mmol, 42.6 mg), 2-

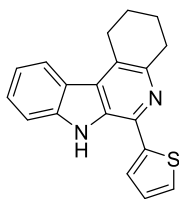

thenaldehyde (**2u**, 0.4 mmol, 36.9  $\mu$ L),  $(\text{NH}_4)_3\text{PO}_4 \cdot 3\text{H}_2\text{O}$  (0.2 mmol, 40.6 mg),  $\text{Na}_2\text{CO}_3$  (0.1 mmol, 10.6 mg),  $\text{H}_2\text{O}$  (0.6 mmol, 10.8  $\mu$ L), and  $\text{PhCF}_3$  (0.6 mL).

The reaction vessel stirred at 150  $^\circ\text{C}$  for 12 h under oxygen atmosphere. The residue was purified by column chromatography on silica gel (petroleum ether/EtOAc = 10:1) to yield the desired product **3u** as yellow solid, yield: 38.2 mg (63%), mp 238-241  $^\circ\text{C}$ .

$^1\text{H}$  NMR (400 MHz,  $\text{CDCl}_3$ , ppm):  $\delta$  8.55 (s, 1H), 8.13 (d,  $J = 8.0$  Hz, 1H), 7.61 (d,  $J = 3.5$  Hz, 1H), 7.51 – 7.44 (m, 2H), 7.40 (d,  $J = 5.0$  Hz, 1H), 7.28 – 7.23 (m, 1H), 7.15 (dd,  $J = 5.0, 3.7$  Hz, 1H), 3.31 (t,  $J = 5.3$  Hz, 2H), 3.09 (t,  $J = 5.1$  Hz, 2H), 1.98 (p,  $J = 4.3$  Hz, 4H).  $^{13}\text{C}$   $\{^1\text{H}\}$  NMR (100 MHz,  $\text{CDCl}_3$ , ppm):  $\delta$  146.7, 142.9, 140.6, 133.8, 130.7, 128.8, 127.8, 127.5, 126.4, 125.6, 124.6, 123.9, 122.5, 120.0, 111.4, 32.5, 27.1, 23.2, 22.7. HRMS (ESI)  $m/z$  calcd for  $\text{C}_{19}\text{H}_{17}\text{N}_2\text{S}^+$   $[\text{M}+\text{H}]^+$  305.1107, found 305.1115.

#### 6-Cyclohexyl-2,3,4,7-tetrahydro-1H-indolo[2,3-c]quinolone (**3v**)

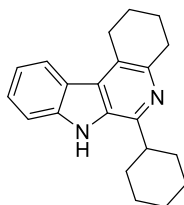

The reaction was conducted with 2-(1H-indol-3-yl)cyclohexan-1-one (**1a**, 0.2 mmol, 42.6 mg), cyclohexanecarboxaldehyde (**2v**, 0.4 mmol, 48.4  $\mu$ L),  $(\text{NH}_4)_3\text{PO}_4 \cdot 3\text{H}_2\text{O}$  (0.2 mmol, 40.6 mg),  $\text{Na}_2\text{CO}_3$  (0.1 mmol, 10.6 mg),  $\text{H}_2\text{O}$  (0.6 mmol, 10.8  $\mu$ L), and  $\text{PhCF}_3$  (0.6 mL). The reaction vessel stirred at 150  $^\circ\text{C}$  for

12 h under oxygen atmosphere. The residue was purified by column chromatography on silica gel (petroleum ether/EtOAc = 30:1) to yield the desired product **3v** as white solid, yield: 28.0 mg (46%), mp 217-219  $^\circ\text{C}$ .

$^1\text{H}$  NMR (400 MHz,  $\text{CDCl}_3$ , ppm):  $\delta$  8.77 (s, 1H), 8.17 (d,  $J = 8.0$  Hz, 1H), 7.50 – 7.45 (m, 2H), 7.26 – 7.21 (m, 1H), 3.34 (t,  $J = 5.7$  Hz, 2H), 3.11 – 3.05 (m, 3H), 2.00 – 1.85 (m, 10H), 1.71 (d,  $J = 7.8$  Hz, 1H), 1.42 – 1.25 (m, 3H).  $^{13}\text{C}$   $\{^1\text{H}\}$  NMR (100 MHz,  $\text{CDCl}_3$ , ppm):  $\delta$  146.5, 145.7, 140.1, 131.5, 127.6, 127.1, 123.8, 123.8, 122.7, 119.5, 111.2, 43.0, 32.5, 31.7, 27.0, 26.7, 26.0, 23.4, 22.8. HRMS (ESI)  $m/z$  calcd for  $\text{C}_{21}\text{H}_{25}\text{N}_2^+$   $[\text{M}+\text{H}]^+$  305.2012, found 305.2023.

#### 11-Methyl-6-phenyl-2,3,4,7-tetrahydro-1H-indolo[2,3-c]quinolone (**3w**)

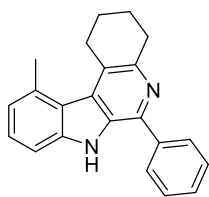

The reaction was conducted with 2-(4-methyl-1*H*-indol-3-yl)cyclohexan-1-one (**1b**, 0.2 mmol, 45.4 mg), benzaldehyde (**2a**, 0.4 mmol, 40.8  $\mu$ L),  $(\text{NH}_4)_3\text{PO}_4 \cdot 3\text{H}_2\text{O}$  (0.2 mmol, 40.6 mg),  $\text{Na}_2\text{CO}_3$  (0.1 mmol, 10.6 mg),  $\text{H}_2\text{O}$  (0.6 mmol, 10.8  $\mu$ L), and  $\text{PhCF}_3$  (0.6 mL). The reaction vessel stirred at 150

$^\circ\text{C}$  for 12 h under oxygen atmosphere. The residue was purified by column chromatography on silica gel (petroleum ether/EtOAc = 10:1) to yield the desired product **3w** as white solid, yield: 29.4 mg (47%), mp 210-213  $^\circ\text{C}$ .

$^1\text{H}$  NMR (400 MHz,  $\text{CDCl}_3$ , ppm):  $\delta$  8.55 (s, 1H), 7.81 (d,  $J = 7.1$  Hz, 2H), 7.51 (t,  $J = 7.5$  Hz, 2H), 7.41 (t,  $J = 7.4$  Hz, 1H), 7.34 (t,  $J = 7.8$  Hz, 1H), 7.24 (d,  $J = 5.9$  Hz, 1H), 7.02 (d,  $J = 7.1$  Hz, 1H), 3.54 (t,  $J = 6.2$  Hz, 2H), 3.19 (t,  $J = 6.4$  Hz, 2H), 3.00 (s, 3H), 2.01 – 1.89 (m, 4H).  $^{13}\text{C}$   $\{^1\text{H}\}$  NMR (100 MHz,  $\text{CDCl}_3$ , ppm):  $\delta$  146.7, 141.3, 140.7, 138.6, 133.6, 131.7, 129.6, 129.1, 128.4, 128.3, 127.6, 124.5, 123.3, 121.8, 109.4, 33.4, 31.4, 26.4, 23.5, 23.1. HRMS (ESI)  $m/z$  calcd for  $\text{C}_{22}\text{H}_{21}\text{N}_2^+$   $[\text{M}+\text{H}]^+$  313.1699, found 313.1711.

#### 10-Methyl-6-phenyl-2,3,4,7-tetrahydro-1*H*-indolo[2,3-*c*]quinolone (**3x**)

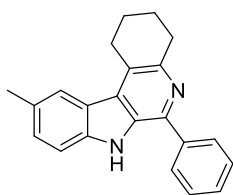

The reaction was conducted with 2-(5-methyl-1*H*-indol-3-yl)cyclohexan-1-one (**1c**, 0.2 mmol, 45.4 mg), benzaldehyde (**2a**, 0.4 mmol, 40.8  $\mu$ L),  $(\text{NH}_4)_3\text{PO}_4 \cdot 3\text{H}_2\text{O}$  (0.2 mmol, 40.6 mg),  $\text{Na}_2\text{CO}_3$  (0.1 mmol, 10.6 mg),  $\text{H}_2\text{O}$  (0.6 mmol, 10.8  $\mu$ L), and  $\text{PhCF}_3$  (0.6 mL). The reaction vessel stirred at 150

$^\circ\text{C}$  for 12 h under oxygen atmosphere. The residue was purified by column chromatography on silica gel (petroleum ether/EtOAc = 10:1) to yield the desired product **3x** as white solid, yield: 54.2 mg (87%), mp 237-238  $^\circ\text{C}$ .

$^1\text{H}$  NMR (400 MHz,  $\text{CDCl}_3$ , ppm):  $\delta$  8.44 (s, 1H), 7.97 (s, 1H), 7.86 (d,  $J = 7.4$  Hz, 2H), 7.50 (t,  $J = 7.6$  Hz, 2H), 7.39 (t,  $J = 7.4$  Hz, 1H), 7.31 (t,  $J = 9.0$  Hz, 2H), 3.37 (t,  $J = 5.4$  Hz, 2H), 3.14 (t,  $J = 5.4$  Hz, 2H), 2.53 (s, 3H), 2.05 – 2.00 (m, 4H).  $^{13}\text{C}$   $\{^1\text{H}\}$  NMR (100 MHz,  $\text{CDCl}_3$ , ppm):  $\delta$  146.4, 139.8, 138.8, 138.7, 132.0, 129.0, 128.8, 128.2, 128.2, 128.2, 125.3, 123.7, 122.7, 110.9, 32.6, 27.2, 23.4, 22.8, 21.5. HRMS (ESI)  $m/z$  calcd for  $\text{C}_{22}\text{H}_{21}\text{N}_2^+$   $[\text{M}+\text{H}]^+$  313.1699, found 313.1711.

#### 10-Methoxy-6-phenyl-2,3,4,7-tetrahydro-1*H*-indolo[2,3-*c*]quinolone (**3y**)

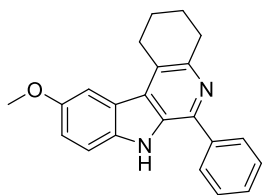

The reaction was conducted with 2-(5-methoxy-1*H*-indol-3-yl)cyclohexan-1-one (**1d**, 0.2 mmol, 48.6 mg), benzaldehyde (**2a**, 0.4 mmol, 40.8  $\mu$ L),  $(\text{NH}_4)_3\text{PO}_4 \cdot 3\text{H}_2\text{O}$  (0.2 mmol, 40.6 mg),  $\text{Na}_2\text{CO}_3$  (0.1 mmol, 10.6 mg),  $\text{H}_2\text{O}$  (0.6 mmol, 10.8  $\mu$ L), and  $\text{PhCF}_3$  (0.6 mL). The

reaction vessel stirred at 150  $^\circ\text{C}$  for 12 h under oxygen atmosphere. The residue was purified by column chromatography on silica gel (petroleum ether/EtOAc = 10:1) to yield the desired product **3y** as white solid, yield: 49.2 mg (75%), mp 119-122  $^\circ\text{C}$ .

$^1\text{H}$  NMR (400 MHz,  $\text{CDCl}_3$ , ppm):  $\delta$  8.46 (s, 1H), 7.85 (d,  $J = 7.1$  Hz, 2H), 7.64 (s, 1H), 7.48 (t,  $J = 7.5$  Hz, 2H), 7.38 (t,  $J = 7.4$  Hz, 1H), 7.32 (d,  $J = 8.8$  Hz, 1H), 7.14 (d,  $J = 8.8$  Hz, 1H), 3.91 (s, 3H), 3.35 (t,  $J = 5.3$  Hz, 2H), 3.13 (t,  $J = 5.3$  Hz, 2H), 2.03 – 1.99 (m, 4H).  $^{13}\text{C}$   $\{^1\text{H}\}$  NMR (100 MHz,  $\text{CDCl}_3$ , ppm):  $\delta$  153.8, 146.1, 140.0, 138.7, 135.5, 132.5, 129.0, 128.3, 128.2, 128.1, 125.2, 122.8, 116.7, 111.9, 106.6, 56.1, 32.5, 27.0, 23.3, 22.8. HRMS (ESI)  $m/z$  calcd for  $\text{C}_{22}\text{H}_{21}\text{N}_2\text{O}^+$   $[\text{M}+\text{H}]^+$  329.1648, found 329.1658.

#### 10-Chloro-6-phenyl-2,3,4,7-tetrahydro-1*H*-indolo[2,3-*c*]quinolone (**3z**)

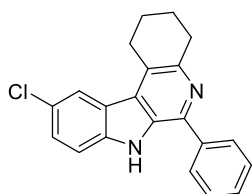

The reaction was conducted with 2-(5-chloro-1*H*-indol-3-yl)cyclohexan-1-one (**1e**, 0.2 mmol, 49.4 mg), benzaldehyde (**2a**, 0.4 mmol, 40.8  $\mu$ L),  $(\text{NH}_4)_3\text{PO}_4 \cdot 3\text{H}_2\text{O}$  (0.2 mmol, 40.6 mg),  $\text{Na}_2\text{CO}_3$  (0.1 mmol, 10.6 mg),  $\text{H}_2\text{O}$  (0.6 mmol, 10.8  $\mu$ L), and  $\text{PhCF}_3$  (0.6 mL). The reaction vessel stirred at

150  $^\circ\text{C}$  for 12 h under oxygen atmosphere. The residue was purified by column chromatography on silica gel (petroleum ether/EtOAc = 10:1) to yield the desired product **3z** as white solid, yield: 50.8 mg (77%), mp 222-224  $^\circ\text{C}$ .

$^1\text{H}$  NMR (400 MHz,  $\text{CDCl}_3$ , ppm):  $\delta$  8.44 (s, 1H), 8.17 (s, 1H), 7.88 (d,  $J = 7.2$  Hz, 2H), 7.55 (t,  $J = 7.5$  Hz, 2H), 7.48 – 7.43 (m, 2H), 7.40 (d,  $J = 8.7$  Hz, 1H), 3.36 (t,  $J = 5.6$  Hz, 2H), 3.16 (t,  $J = 5.4$  Hz, 2H), 2.07 – 2.02 (m, 4H).  $^{13}\text{C}$   $\{^1\text{H}\}$  NMR (100 MHz,  $\text{CDCl}_3$ , ppm):  $\delta$  147.0, 140.2, 138.7, 138.4, 132.2, 129.1, 128.5, 128.1, 127.5, 125.4, 125.1, 123.5, 123.4, 112.2, 32.6, 27.0, 23.3, 22.6. HRMS (ESI)  $m/z$  calcd for  $\text{C}_{21}\text{H}_{18}\text{ClN}_2^+$   $[\text{M}+\text{H}]^+$  333.1153, found 333.1168.

#### 9-Chloro-6-phenyl-2,3,4,7-tetrahydro-1*H*-indolo[2,3-*c*]quinolone (**3aa**)

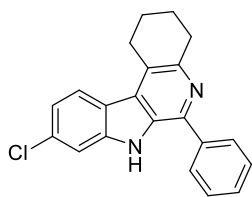

The reaction was conducted with 2-(6-chloro-1*H*-indol-3-yl)cyclohexan-1-one (**1f**, 0.2 mmol, 49.4 mg), benzaldehyde (**2a**, 0.4 mmol, 40.8  $\mu$ L),  $(\text{NH}_4)_3\text{PO}_4 \cdot 3\text{H}_2\text{O}$  (0.2 mmol, 40.6 mg),  $\text{Na}_2\text{CO}_3$  (0.1 mmol, 10.6 mg),  $\text{H}_2\text{O}$  (0.6 mmol, 10.8  $\mu$ L), and  $\text{PhCF}_3$  (0.6 mL). The reaction vessel stirred at

150  $^\circ\text{C}$  for 12 h under oxygen atmosphere. The residue was purified by column chromatography on silica gel (petroleum ether/EtOAc = 10:1) to yield the desired product **3aa** as white solid, yield: 56.6 mg (85%), mp 206-208  $^\circ\text{C}$ .

$^1\text{H}$  NMR (400 MHz,  $\text{CDCl}_3$ , ppm):  $\delta$  8.47 (s, 1H), 8.09 (d,  $J = 8.5$  Hz, 1H), 7.86 (d,  $J = 7.1$  Hz, 2H), 7.54 (t,  $J = 7.5$  Hz, 2H), 7.46 – 7.42 (m, 2H), 7.23 (d,  $J = 8.5$  Hz, 1H), 3.35 (t,  $J = 5.4$  Hz, 2H), 3.15 (t,  $J = 5.2$  Hz, 2H), 2.05 – 2.01 (m, 4H).  $^{13}\text{C}$   $\{^1\text{H}\}$  NMR (100 MHz,  $\text{CDCl}_3$ , ppm):  $\delta$  147.3, 140.9, 140.1, 138.4, 133.3, 132.0, 129.1, 128.5, 128.1, 127.9, 125.2, 124.7, 121.1, 120.5, 111.2, 32.6, 27.0, 23.3, 22.7. HRMS (ESI)  $m/z$  calcd for  $\text{C}_{21}\text{H}_{18}\text{ClN}_2^+$   $[\text{M}+\text{H}]^+$  333.1153, found 333.1168.

#### Methyl 6-phenyl-2,3,4,7-tetrahydro-1*H*-indolo[2,3-*c*]quinoline-9-carboxylate (**3ab**)

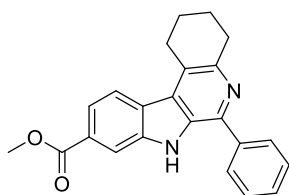

The reaction was conducted with methyl 3-(2-oxocyclohexyl)-1*H*-indole-6-carboxylate (**1g**, 0.2 mmol, 54.2 mg), benzaldehyde (**2a**, 0.4 mmol, 40.8  $\mu$ L),  $(\text{NH}_4)_3\text{PO}_4 \cdot 3\text{H}_2\text{O}$  (0.2 mmol, 40.6 mg),  $\text{Na}_2\text{CO}_3$  (0.1 mmol, 10.6 mg),  $\text{H}_2\text{O}$  (0.6 mmol, 10.8  $\mu$ L), and  $\text{PhCF}_3$  (0.6 mL). The

reaction vessel stirred at 150  $^\circ\text{C}$  for 12 h under oxygen atmosphere. The residue was purified by column chromatography on silica gel (petroleum ether/EtOAc = 5:1) to yield the desired product **3ab** as white solid, yield: 57.6 mg (81%), mp 224-227  $^\circ\text{C}$ .

$^1\text{H}$  NMR (400 MHz,  $\text{CDCl}_3$ , ppm):  $\delta$  8.75 (s, 1H), 8.21 (d,  $J = 8.4$  Hz, 1H), 8.18 (s, 1H), 7.92 (d,  $J = 8.3$  Hz, 1H), 7.88 (d,  $J = 7.2$  Hz, 2H), 7.52 (t,  $J = 7.6$  Hz, 2H), 7.43 (t,  $J = 7.4$  Hz, 1H), 3.94 (s, 3H), 3.38 (t,  $J = 5.4$  Hz, 2H), 3.15 (t,  $J = 5.2$  Hz, 2H), 2.04 – 1.99 (m, 4H).  $^{13}\text{C}$   $\{^1\text{H}\}$  NMR (100 MHz,  $\text{CDCl}_3$ , ppm):  $\delta$  167.4, 147.1, 140.4, 139.8, 138.4, 132.9, 129.2, 128.6, 128.6, 128.1, 127.6, 126.0, 125.8, 123.6, 120.6, 113.2, 52.3, 32.6, 27.1, 23.3, 22.7. HRMS (ESI)  $m/z$  calcd for  $\text{C}_{23}\text{H}_{21}\text{N}_2\text{O}_2^+$   $[\text{M}+\text{H}]^+$  357.1598, found 357.1605.

#### 8-Methyl-6-phenyl-2,3,4,7-tetrahydro-1*H*-indolo[2,3-*c*]quinolone (**3ac**)



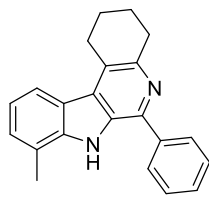

The reaction was conducted with 2-(7-methyl-1*H*-indol-3-yl)cyclohexan-1-one (**1h**, 0.2 mmol, 45.4 mg), benzaldehyde (**2a**, 0.4 mmol, 40.8  $\mu$ L),  $(\text{NH}_4)_3\text{PO}_4 \cdot 3\text{H}_2\text{O}$  (0.2 mmol, 40.6 mg),  $\text{Na}_2\text{CO}_3$  (0.1 mmol, 10.6 mg),  $\text{H}_2\text{O}$  (0.6 mmol, 10.8  $\mu$ L), and  $\text{PhCF}_3$  (0.6 mL). The reaction vessel stirred at 150

$^\circ\text{C}$  for 12 h under oxygen atmosphere. The residue was purified by column chromatography on silica gel (petroleum ether/EtOAc = 10:1) to yield the desired product **3ac** as white solid, yield: 49.1 mg (79%), mp 237-239  $^\circ\text{C}$ .

$^1\text{H}$  NMR (400 MHz,  $\text{CDCl}_3$ , ppm):  $\delta$  8.15 (s, 1H), 8.04 (d,  $J = 8.0$  Hz, 1H), 7.92 (d,  $J = 7.1$  Hz, 2H), 7.57 (t,  $J = 7.6$  Hz, 2H), 7.46 (t,  $J = 7.4$  Hz, 1H), 7.31 (d,  $J = 7.2$  Hz, 1H), 7.19 (t,  $J = 7.6$  Hz, 1H), 3.38 (t,  $J = 5.8$  Hz, 2H), 3.17 (t,  $J = 6.0$  Hz, 2H), 2.53 (s, 3H), 2.06 – 2.00 (m, 4H).  $^{13}\text{C}$   $\{^1\text{H}\}$  NMR (100 MHz,  $\text{CDCl}_3$ , ppm):  $\delta$  146.8, 139.9, 139.8, 139.0, 131.6, 129.2, 128.9, 128.3, 128.1, 127.9, 125.4, 122.1, 121.5, 120.3, 120.0, 32.7, 27.0, 23.4, 22.8, 16.9. HRMS (ESI)  $m/z$  calcd for  $\text{C}_{22}\text{H}_{21}\text{N}_2^+$   $[\text{M}+\text{H}]^+$  313.1699, found 313.1711.

#### 7-Methyl-6-phenyl-2,3,4,7-tetrahydro-1*H*-indolo[2,3-*c*]quinolone (**3ad**)

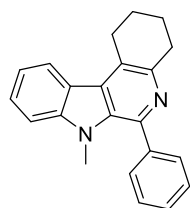

The reaction was conducted with 2-(1-methyl-1*H*-indol-3-yl)cyclohexan-1-one (**1i**, 0.2 mmol, 45.4 mg), benzaldehyde (**2a**, 0.4 mmol, 40.8  $\mu$ L),  $(\text{NH}_4)_3\text{PO}_4 \cdot 3\text{H}_2\text{O}$  (0.2 mmol, 40.6 mg),  $\text{Na}_2\text{CO}_3$  (0.1 mmol, 10.6 mg),  $\text{H}_2\text{O}$  (0.6 mmol, 10.8  $\mu$ L), and  $\text{PhCF}_3$  (0.6 mL). The reaction vessel stirred at 150  $^\circ\text{C}$  for

12 h under oxygen atmosphere. The residue was purified by column chromatography on silica gel (petroleum ether/EtOAc = 15:1) to yield the desired product **3ad** as yellow solid, yield: 46.4 mg (74%), mp 175-178  $^\circ\text{C}$ .

$^1\text{H}$  NMR (400 MHz,  $\text{CDCl}_3$ , ppm):  $\delta$  8.25 (d,  $J = 8.0$  Hz, 1H), 7.62 – 7.54 (m, 3H), 7.52 – 7.43 (m, 3H), 7.40 (d,  $J = 8.3$  Hz, 1H), 7.28 (t,  $J = 7.8$  Hz, 1H), 3.42 (t,  $J = 5.9$  Hz, 2H), 3.39 (s, 3H), 3.14 (t,  $J = 5.7$  Hz, 2H), 2.08 – 2.00 (m, 4H).  $^{13}\text{C}$   $\{^1\text{H}\}$  NMR (100 MHz,  $\text{CDCl}_3$ , ppm):  $\delta$  145.6, 143.0, 141.1, 140.2, 133.4, 129.7, 128.5, 128.1, 128.0, 127.3, 125.1, 124.0, 121.8, 119.4, 109.4, 32.7, 32.6, 27.2, 23.3, 22.8. HRMS (ESI)  $m/z$  calcd for  $\text{C}_{22}\text{H}_{21}\text{N}_2^+$   $[\text{M}+\text{H}]^+$  313.1699, found 313.1709.

#### 7-Benzyl-6-phenyl-2,3,4,7-tetrahydro-1*H*-indolo[2,3-*c*]quinolone (**3ae**)

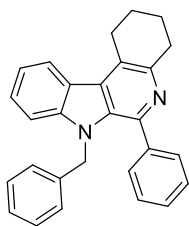

The reaction was conducted with 2-(1-benzyl-1*H*-indol-3-yl)cyclohexan-1-one (**1j**, 0.2 mmol, 60.6 mg), benzaldehyde (**2a**, 0.4 mmol, 40.8  $\mu$ L),  $(\text{NH}_4)_3\text{PO}_4 \cdot 3\text{H}_2\text{O}$  (0.2 mmol, 40.6 mg),  $\text{Na}_2\text{CO}_3$  (0.1 mmol, 10.6 mg),  $\text{H}_2\text{O}$  (0.6 mmol, 10.8  $\mu$ L), and  $\text{PhCF}_3$  (0.6 mL). The reaction vessel stirred at 150  $^\circ\text{C}$  for 12 h under oxygen atmosphere. The residue was purified by column chromatography on silica gel (petroleum ether/EtOAc = 10:1) to yield the desired product **3ae** as yellow solid, yield: 37.8 mg (49%), mp 157-160  $^\circ\text{C}$ .

$^1\text{H}$  NMR (400 MHz,  $\text{CDCl}_3$ , ppm):  $\delta$  8.28 (d,  $J = 8.1$  Hz, 1H), 7.48 (t,  $J = 7.7$  Hz, 1H), 7.33 – 7.23 (m, 7H), 7.09 (q,  $J = 7.5$  Hz, 3H), 6.54 (d,  $J = 7.1$  Hz, 2H), 5.13 (s, 2H), 3.45 (t,  $J = 6.0$  Hz, 2H), 3.13 (t,  $J = 5.8$  Hz, 2H), 2.09 – 1.99 (m, 4H).  $^{13}\text{C}$   $\{^1\text{H}\}$  NMR (100 MHz,  $\text{CDCl}_3$ , ppm):  $\delta$  145.8, 142.6, 141.4, 139.8, 137.2, 132.7, 129.3, 128.8, 128.2, 128.0, 127.5, 126.8, 125.6, 125.3, 124.1, 122.0, 119.7, 110.2, 47.8, 32.6, 27.2, 23.3, 22.8. HRMS (ESI)  $m/z$  calcd for  $\text{C}_{28}\text{H}_{25}\text{N}_2^+$   $[\text{M}+\text{H}]^+$  389.2012, found 389.2027.

#### 1-(6-Phenyl-1,2,3,4-tetrahydro-7*H*-indolo[2,3-*c*]quinolin-7-yl)ethan-1-one (3af)

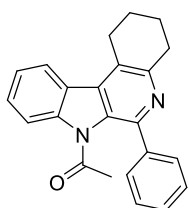

The reaction was conducted with 2-(1-acetyl-1*H*-indol-3-yl)cyclohexan-1-one (**1k**, 0.2 mmol, 51.0 mg), benzaldehyde (**2a**, 0.4 mmol, 40.8  $\mu$ L),  $(\text{NH}_4)_3\text{PO}_4 \cdot 3\text{H}_2\text{O}$  (0.2 mmol, 40.6 mg),  $\text{Na}_2\text{CO}_3$  (0.1 mmol, 10.6 mg),  $\text{H}_2\text{O}$  (0.6 mmol, 10.8  $\mu$ L), and  $\text{PhCF}_3$  (0.6 mL). The reaction vessel stirred at 150  $^\circ\text{C}$  for

12 h under oxygen atmosphere. The residue was purified by column chromatography on silica gel (petroleum ether/EtOAc = 15:1) to yield the desired product **3af** as yellow solid, yield: 20.9 mg (30%), mp 151-152  $^\circ\text{C}$ .

$^1\text{H}$  NMR (400 MHz,  $\text{CDCl}_3$ , ppm):  $\delta$  8.34 (d,  $J = 8.4$  Hz, 1H), 8.16 (d,  $J = 7.9$  Hz, 1H), 7.83 (d,  $J = 7.0$  Hz, 2H), 7.60 (t,  $J = 7.8$  Hz, 1H), 7.51 (t,  $J = 7.5$  Hz, 2H), 7.46 – 7.39 (m, 2H), 3.36 (t,  $J = 5.4$  Hz, 2H), 3.15 (t,  $J = 5.3$  Hz, 2H), 2.08 – 2.00 (m, 4H), 1.79 (s, 3H).  $^{13}\text{C}$   $\{^1\text{H}\}$  NMR (100 MHz,  $\text{CDCl}_3$ , ppm):  $\delta$  172.0, 151.8, 143.7, 140.9, 140.6, 133.3, 131.4, 129.4, 129.2, 128.6, 128.0, 124.9, 124.4, 123.6, 123.6, 115.2, 32.9, 26.9, 26.6, 22.9, 22.7. HRMS (ESI)  $m/z$  calcd for  $\text{C}_{23}\text{H}_{21}\text{N}_2\text{O}^+$   $[\text{M}+\text{H}]^+$  341.1648, found 341.1661.

#### 5-Phenyl-1,2,3,6-tetrahydrocyclopenta[5,6]pyrido[3,4-*b*]indole (3ag)

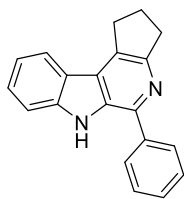

The reaction was conducted with 2-(1*H*-indol-3-yl)cyclopentan-1-one (**1l**, 0.2 mmol, 39.8 mg), benzaldehyde (**2a**, 0.4 mmol, 40.8  $\mu$ L),  $(\text{NH}_4)_3\text{PO}_4 \cdot 3\text{H}_2\text{O}$  (0.2 mmol, 40.6 mg),  $\text{Na}_2\text{CO}_3$  (0.1 mmol, 10.6 mg),  $\text{H}_2\text{O}$  (0.6 mmol, 10.8  $\mu$ L), and  $\text{PhCF}_3$  (0.6 mL). The reaction vessel stirred at 150  $^\circ\text{C}$  for 12 h under oxygen atmosphere. The residue was purified by column chromatography on silica gel (petroleum ether/EtOAc = 10:1) to yield the desired product **3ag** as yellow solid, yield: 39.7 mg (70%), mp 193-196  $^\circ\text{C}$ .

$^1\text{H}$  NMR (400 MHz,  $\text{CDCl}_3$ , ppm):  $\delta$  8.50 (s, 1H), 8.09 (d,  $J = 7.8$  Hz, 1H), 7.90 (d,  $J = 7.2$  Hz, 2H), 7.57 – 7.50 (m, 3H), 7.48 – 7.41 (m, 2H), 7.28 (t,  $J = 7.4$  Hz, 1H), 3.46 (t,  $J = 7.4$  Hz, 2H), 3.24 (t,  $J = 7.6$  Hz, 2H), 2.36 (p,  $J = 7.6$  Hz, 2H).  $^{13}\text{C}$   $\{^1\text{H}\}$  NMR (100 MHz,  $\text{CDCl}_3$ , ppm):  $\delta$  155.1, 140.7, 140.6, 139.0, 132.4, 129.1, 128.3, 128.3, 128.1, 127.9, 127.0, 123.0, 121.9, 119.9, 111.2, 33.5, 29.9, 23.5. HRMS (ESI)  $m/z$  calcd for  $\text{C}_{20}\text{H}_{17}\text{N}_2^+$   $[\text{M}+\text{H}]^+$  285.1386, found 285.1387.

#### 6-Phenyl-2,3,4,7-tetrahydro-1*H*-pyrido[3',2':4,5]pyrrolo[2,3-*c*]quinolone (**3ah**)

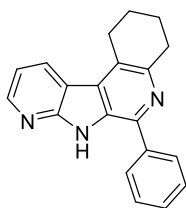

The reaction was conducted with 2-(1*H*-pyrrolo[2,3-*b*]pyridin-3-yl)cyclohexan-1-one (**1m**, 0.2 mmol, 42.8 mg), benzaldehyde (**2a**, 0.4 mmol, 40.8  $\mu$ L),  $(\text{NH}_4)_3\text{PO}_4 \cdot 3\text{H}_2\text{O}$  (0.2 mmol, 40.6 mg),  $\text{Na}_2\text{CO}_3$  (0.1 mmol, 10.6 mg),  $\text{H}_2\text{O}$  (0.6 mmol, 10.8  $\mu$ L), and  $\text{PhCF}_3$  (0.6 mL). The reaction vessel stirred at 150  $^\circ\text{C}$  for 12 h under oxygen atmosphere. The residue was purified by column chromatography on silica gel (petroleum ether/EtOAc = 5:1) to yield the desired product **3ah** as yellow solid, yield: 22.1 mg (37%), mp 243-245  $^\circ\text{C}$ .

$^1\text{H}$  NMR (400 MHz,  $\text{CDCl}_3$ , ppm):  $\delta$  11.32 (s, 1H), 8.41 (d,  $J = 7.8$  Hz, 1H), 7.99 (d,  $J = 7.9$  Hz, 2H), 7.72 (d,  $J = 4.4$  Hz, 1H), 7.55 (t,  $J = 7.5$  Hz, 2H), 7.49 (d,  $J = 7.2$  Hz, 1H), 7.07 (dd,  $J = 7.7$ , 4.9 Hz, 1H), 3.33 (t,  $J = 5.2$  Hz, 2H), 3.17 (t,  $J = 5.6$  Hz, 2H), 2.04 (p,  $J = 3.1$  Hz, 4H).  $^{13}\text{C}$   $\{^1\text{H}\}$  NMR (100 MHz,  $\text{CDCl}_3$ , ppm):  $\delta$  152.7, 147.6, 147.5, 140.8, 138.8, 132.2, 130.8, 129.2, 128.5, 128.5, 126.5, 125.6, 115.5, 115.4, 32.6, 27.0, 23.4, 22.6. HRMS (ESI)  $m/z$  calcd for  $\text{C}_{20}\text{H}_{18}\text{N}_3^+$   $[\text{M}+\text{H}]^+$  300.1495, found 300.1507.

#### 4-Benzyl-6-phenyl-7*H*-indolo[2,3-*c*]quinolone (**4a**)

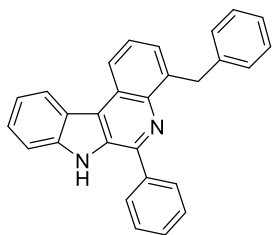

The reaction was conducted with 2-(1*H*-indol-3-yl)cyclohexan-1-one (**1a**, 0.2 mmol, 42.6 mg), benzaldehyde (**2a**, 0.6 mmol, 61.2  $\mu$ L), NH<sub>4</sub>I (0.4 mmol, 58.0 mg), NaHCO<sub>3</sub> (0.2 mmol, 16.8 mg), and DMF (0.6 mL). The reaction vessel stirred at 150 °C for 20 h under oxygen atmosphere. The residue was purified by column chromatography on silica gel (petroleum ether/EtOAc = 20:1) to yield the desired product **4a** as white solid, yield: 42.4 mg (55%), mp 86-89 °C.

<sup>1</sup>H NMR (400 MHz, CDCl<sub>3</sub>, ppm):  $\delta$  8.75 (s, 1H), 8.58 (dd,  $J$  = 14.5, 8.1 Hz, 2H), 8.05 (d,  $J$  = 7.2 Hz, 2H), 7.61 (t,  $J$  = 7.7 Hz, 3H), 7.57 – 7.50 (m, 3H), 7.46 (d,  $J$  = 7.1 Hz, 1H), 7.39 (t,  $J$  = 7.2 Hz, 3H), 7.27 (t,  $J$  = 7.5 Hz, 2H), 7.17 (t,  $J$  = 7.3 Hz, 1H), 4.83 (s, 2H). <sup>13</sup>C {<sup>1</sup>H} NMR (100 MHz, CDCl<sub>3</sub>, ppm):  $\delta$  145.0, 142.3, 141.4, 141.2, 139.0, 138.9, 130.6, 129.4, 129.2, 129.2, 128.6, 128.1, 126.8, 126.7, 126.4, 125.6, 124.4, 123.2, 122.9, 122.6, 121.5, 120.8, 112.0, 38.1. HRMS (ESI)  $m/z$  calcd for C<sub>28</sub>H<sub>21</sub>N<sub>2</sub><sup>+</sup> [M+H]<sup>+</sup> 385.1699, found 385.1700.

#### 4-(4-Methylbenzyl)-6-(*p*-tolyl)-7*H*-indolo[2,3-*c*]quinolone (**4b**)

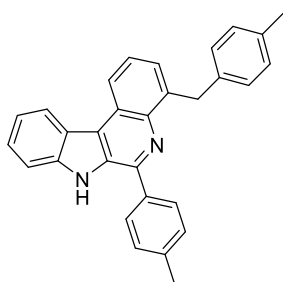

The reaction was conducted with 2-(1*H*-indol-3-yl)cyclohexan-1-one (**1a**, 0.2 mmol, 42.6 mg), 4-methylbenzaldehyde (**2b**, 0.6 mmol, 71.0  $\mu$ L), NH<sub>4</sub>I (0.4 mmol, 58.0 mg), NaHCO<sub>3</sub> (0.2 mmol, 16.8 mg), and DMF (0.6 mL). The reaction vessel stirred at 150 °C for 20 h under oxygen atmosphere. The residue was purified by column

chromatography on silica gel (petroleum ether/EtOAc = 20:1) to yield the desired product **4b** as white solid, yield: 41.7 mg (51%), mp 183-185 °C.

<sup>1</sup>H NMR (400 MHz, CDCl<sub>3</sub>, ppm):  $\delta$  8.73 (s, 1H), 8.57 (t,  $J$  = 7.9 Hz, 2H), 7.96 (d,  $J$  = 8.0 Hz, 2H), 7.61 – 7.50 (m, 3H), 7.45 – 7.37 (m, 4H), 7.30 (d,  $J$  = 7.9 Hz, 2H), 7.08 (d,  $J$  = 7.8 Hz, 2H), 4.79 (s, 2H), 2.47 (s, 3H), 2.30 (s, 3H). <sup>13</sup>C {<sup>1</sup>H} NMR (100 MHz, CDCl<sub>3</sub>, ppm):  $\delta$  145.0, 141.4, 141.4, 139.3, 139.2, 139.0, 136.0, 135.0, 130.7, 129.8, 129.3, 128.8, 128.5, 126.7, 126.5, 126.2, 124.3, 123.2, 123.0, 122.5, 121.3, 120.8, 111.9, 37.6, 21.4, 21.0. HRMS (ESI)  $m/z$  calcd for C<sub>30</sub>H<sub>25</sub>N<sub>2</sub><sup>+</sup> [M+H]<sup>+</sup> 413.2012, found 413.2020.

#### 4-(4-Chlorobenzyl)-6-(4-chlorophenyl)-7*H*-indolo[2,3-*c*]quinolone (**4c**)

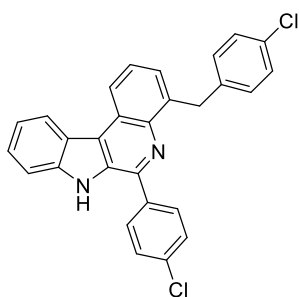

The reaction was conducted with 2-(1*H*-indol-3-yl)cyclohexan-1-one (**1a**, 0.2 mmol, 42.6 mg), 4-chlorobenzaldehyde (**2f**, 0.6 mmol, 84.3 mg), NH<sub>4</sub>I (0.4 mmol, 58.0 mg), NaHCO<sub>3</sub> (0.2 mmol, 16.8 mg), and DMF (0.6 mL). The reaction vessel stirred at 150 °C for 20 h under oxygen atmosphere. The residue was purified by column chromatography on silica gel (petroleum ether/EtOAc = 10:1) to yield the desired product **4c** as white solid, yield: 31.1 mg (34%), mp 196-198 °C.

<sup>1</sup>H NMR (400 MHz, CDCl<sub>3</sub>, ppm): δ 8.68 (s, 1H), 8.60 (d, *J* = 8.2 Hz, 1H), 8.55 (d, *J* = 8.1 Hz, 1H), 7.92 (d, *J* = 8.3 Hz, 2H), 7.62 (t, *J* = 7.7 Hz, 1H), 7.59 – 7.53 (m, 4H), 7.45 (d, *J* = 7.0 Hz, 1H), 7.40 (t, *J* = 6.8 Hz, 1H), 7.28 (d, *J* = 8.4 Hz, 1H), 7.22 (t, *J* = 8.0 Hz, 3H), 4.72 (s, 2H). <sup>13</sup>C {<sup>1</sup>H} NMR (100 MHz, CDCl<sub>3</sub>, ppm): δ 143.8, 141.3, 140.7, 140.5, 139.1, 137.1, 135.3, 131.3, 130.6, 130.4, 129.8, 129.4, 128.2, 127.0, 126.9, 126.5, 124.5, 123.2, 122.9, 122.8, 121.8, 121.0, 112.0, 37.6. HRMS (ESI) *m/z* calcd for C<sub>28</sub>H<sub>19</sub>Cl<sub>2</sub>N<sub>2</sub><sup>+</sup> [M+H]<sup>+</sup> 453.0920, found 453.0924.

#### 4-(2-Methylbenzyl)-6-(*o*-tolyl)-7*H*-indolo[2,3-*c*]quinolone (**4d**)

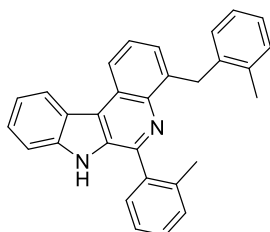

The reaction was conducted with 2-(1*H*-indol-3-yl)cyclohexan-1-one (**1a**, 0.2 mmol, 42.6 mg), 2-methylbenzaldehyde (**2w**, 0.6 mmol, 69.5 μL), NH<sub>4</sub>I (0.4 mmol, 58.0 mg), NaHCO<sub>3</sub> (0.2 mmol, 16.8 mg), and DMF (0.6 mL). The reaction vessel stirred at 150 °C for 20 h under oxygen atmosphere. The residue was purified by column chromatography on silica gel (petroleum ether/EtOAc = 10:1) to yield the desired product **4d** as white solid, yield: 39.6 mg (48%), mp 184-187 °C.

<sup>1</sup>H NMR (400 MHz, CDCl<sub>3</sub>, ppm): δ 8.62 (dd, *J* = 12.8, 8.1 Hz, 2H), 8.41 (s, 1H), 7.63 – 7.57 (m, 2H), 7.53 – 7.51 (m, 2H), 7.44 – 7.36 (m, 4H), 7.20 – 7.09 (m, 5H), 4.80 (s, 2H), 2.30 (s, 3H), 2.25 (s, 3H). <sup>13</sup>C {<sup>1</sup>H} NMR (100 MHz, CDCl<sub>3</sub>, ppm): δ 146.2, 141.2, 140.5, 139.9, 138.9, 137.5, 137.2, 137.0, 131.5, 131.4, 130.4, 130.0, 129.1, 129.0, 126.8, 126.7, 126.1, 126.0, 125.8, 125.6, 124.1, 123.3, 123.0, 122.1, 121.3, 120.8, 111.9, 35.4, 20.0, 19.7. HRMS (ESI) *m/z* calcd for C<sub>30</sub>H<sub>25</sub>N<sub>2</sub><sup>+</sup> [M+H]<sup>+</sup> 413.2012, found 413.2020.

#### 4-(3-Methylbenzyl)-6-(*m*-tolyl)-7*H*-indolo[2,3-*c*]quinolone (**4e**)

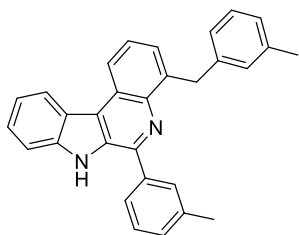

The reaction was conducted with 2-(1*H*-indol-3-yl)cyclohexan-1-one (**1a**, 0.2 mmol, 42.6 mg), 3-methylbenzaldehyde (**2i**, 0.6 mmol, 70.8  $\mu$ L), NH<sub>4</sub>I (0.4 mmol, 58.0 mg), NaHCO<sub>3</sub> (0.2 mmol, 16.8 mg), and DMF (0.6 mL). The reaction vessel stirred at 150 °C for 20 h under oxygen atmosphere. The residue was purified by column chromatography on silica gel (petroleum ether/EtOAc = 10:1) to yield the desired product **4e** as white solid, yield: 44.4 mg (54%), mp 182-184 °C.

<sup>1</sup>H NMR (400 MHz, CDCl<sub>3</sub>, ppm):  $\delta$  8.74 (s, 1H), 8.57 (dd, *J* = 13.5, 8.2 Hz, 2H), 7.82 (d, *J* = 6.2 Hz, 2H), 7.61 (t, *J* = 7.7 Hz, 1H), 7.55 (t, *J* = 7.6 Hz, 1H), 7.52 – 7.46 (m, 3H), 7.38 (t, *J* = 7.4 Hz, 1H), 7.33 (d, *J* = 7.6 Hz, 1H), 7.26 (s, 1H), 7.20 – 7.15 (m, 2H), 6.99 (d, *J* = 7.1 Hz, 1H), 4.78 (s, 2H), 2.49 (s, 3H), 2.30 (s, 3H). <sup>13</sup>C {<sup>1</sup>H} NMR (100 MHz, CDCl<sub>3</sub>, ppm):  $\delta$  145.2, 142.2, 141.4, 141.3, 139.0, 139.0, 138.8, 137.6, 130.7, 130.2, 130.0, 129.4, 129.0, 128.0, 126.7, 126.6, 126.5, 126.4, 126.3, 125.5, 124.4, 123.2, 123.0, 122.5, 121.4, 120.8, 111.9, 38.1, 21.7, 21.4. (PE/EA = 10:1), white solid, yield: 44.4 mg (54%), mp 182-184 °C, HRMS (ESI) *m/z* calcd for C<sub>30</sub>H<sub>25</sub>N<sub>2</sub><sup>+</sup> [M+H]<sup>+</sup> 413.2012, found 413.2020.

#### 6-(Naphthalen-2-yl)-4-(naphthalen-2-ylmethyl)-7*H*-indolo[2,3-*c*]quinolone (**4f**)

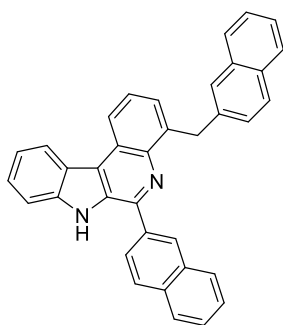

The reaction was conducted with 2-(1*H*-indol-3-yl)cyclohexan-1-one (**1a**, 0.2 mmol, 42.6 mg), 2-naphthaldehyde (**2p**, 0.6 mmol, 93.4 mg), NH<sub>4</sub>I (0.4 mmol, 58.0 mg), NaHCO<sub>3</sub> (0.2 mmol, 16.8 mg), and DMF (0.6 mL). The reaction vessel stirred at 150 °C for 20 h under oxygen atmosphere. The residue was purified by column chromatography on silica gel (petroleum ether/EtOAc = 10:1) to yield the desired product **4f** as white solid, yield: 35.4 mg (37%), mp 162-164 °C.

<sup>1</sup>H NMR (400 MHz, CDCl<sub>3</sub>, ppm):  $\delta$  8.80 (s, 1H), 8.61 (d, *J* = 7.5 Hz, 1H), 8.56 (d, *J* = 8.0 Hz, 1H), 8.38 (s, 1H), 8.12 (d, *J* = 8.5 Hz, 1H), 8.00 (d, *J* = 8.5 Hz, 1H), 7.92 – 7.86 (m, 3H), 7.76 (q, *J* = 8.3 Hz, 3H), 7.62 (d, *J* = 8.0 Hz, 1H), 7.56 – 7.49 (m, 6H), 7.43 – 7.36 (m, 3H), 4.98 (s, 2H). <sup>13</sup>C {<sup>1</sup>H} NMR (100 MHz, CDCl<sub>3</sub>, ppm):  $\delta$  145.0, 141.6, 141.0, 139.9, 139.1, 136.2, 133.6, 133.6, 133.3, 131.9, 130.9, 129.0, 128.4, 128.3, 127.8, 127.7, 127.6, 127.5, 126.8, 126.8, 126.7, 126.6, 126.6, 126.4, 125.7, 125.0, 124.4, 123.2, 123.0, 122.7, 121.7, 120.9, 112.0, 38.6. HRMS (ESI) *m/z* calcd

for  $C_{36}H_{25}N_2^+$   $[M+H]^+$  485.2012, found 485.2023.

#### 4-Benzyl-11-methyl-6-phenyl-7H-indolo[2,3-c]quinolone (4g)

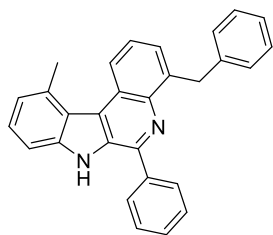

The reaction was conducted with 2-(4-methyl-1*H*-indol-3-yl)cyclohexan-1-one (**1b**, 0.2 mmol, 45.4 mg), benzaldehyde (**2a**, 0.6 mmol, 61.2  $\mu$ L),  $NH_4I$  (0.4 mmol, 58.0 mg),  $NaHCO_3$  (0.2 mmol, 16.8 mg), and DMF (0.6 mL). The reaction vessel stirred at 150  $^{\circ}C$  for 20 h under oxygen atmosphere. The residue was purified by column chromatography on silica gel (petroleum ether/EtOAc = 10:1) to yield the desired product **4g** as white solid, yield: 35.8 mg (45%), mp 112-114  $^{\circ}C$ .

$^1H$  NMR (400 MHz,  $CDCl_3$ , ppm):  $\delta$  8.94 (d,  $J$  = 8.4 Hz, 1H), 8.79 (s, 1H), 7.99 (d,  $J$  = 7.1 Hz, 2H), 7.61 (t,  $J$  = 7.4 Hz, 2H), 7.53 (t,  $J$  = 7.9 Hz, 2H), 7.45 – 7.36 (m, 5H), 7.27 (t,  $J$  = 7.5 Hz, 2H), 7.18 (d,  $J$  = 7.3 Hz, 1H), 7.14 (d,  $J$  = 7.6 Hz, 1H), 4.82 (s, 2H), 3.22 (s, 3H).  $^{13}C$   $\{^1H\}$  NMR (100 MHz,  $CDCl_3$ , ppm):  $\delta$  145.1, 142.4, 142.0, 141.2, 139.9, 138.8, 133.3, 130.7, 129.4, 129.2, 129.2, 128.7, 128.1, 126.9, 126.1, 125.5, 124.1, 124.0, 124.0, 123.7, 122.9, 109.7, 38.5, 26.8. HRMS (ESI)  $m/z$  calcd for  $C_{29}H_{23}N_2^+$   $[M+H]^+$  399.1856, found 399.1865.

#### 4-Benzyl-10-methyl-6-phenyl-7H-indolo[2,3-c]quinolone (4h)

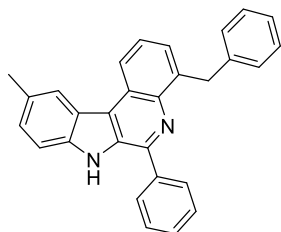

The reaction was conducted with 2-(5-methyl-1*H*-indol-3-yl)cyclohexan-1-one (**1c**, 0.2 mmol, 45.4 mg), benzaldehyde (**2a**, 0.6 mmol, 61.2  $\mu$ L),  $NH_4I$  (0.4 mmol, 58.0 mg),  $NaHCO_3$  (0.2 mmol, 16.8 mg), and DMF (0.6 mL). The reaction vessel stirred at 150  $^{\circ}C$  for 20 h under oxygen atmosphere. The residue was purified by column chromatography on silica gel (petroleum ether/EtOAc = 10:1) to yield the desired product **4h** as white solid, yield: 39.0 mg (49%), mp 143-146  $^{\circ}C$ .

$^1H$  NMR (400 MHz,  $CDCl_3$ , ppm):  $\delta$  8.64 – 8.54 (m, 2H), 8.32 (s, 1H), 8.03 (d,  $J$  = 7.7 Hz, 2H), 7.61 – 7.55 (m, 3H), 7.51 (t,  $J$  = 7.3 Hz, 1H), 7.41 (dd,  $J$  = 15.2, 6.8 Hz, 4H), 7.32 (d,  $J$  = 8.7 Hz, 1H), 7.27 (t,  $J$  = 7.5 Hz, 2H), 7.17 (t,  $J$  = 7.3 Hz, 1H), 4.81 (s, 2H), 2.58 (s, 3H).  $^{13}C$   $\{^1H\}$  NMR (100 MHz,  $CDCl_3$ , ppm):  $\delta$  144.9, 142.3, 141.3, 141.1, 138.9, 137.3, 130.8, 130.1, 129.4, 129.1, 129.1, 128.6, 128.3, 128.1, 126.5, 126.2, 125.6, 124.5, 123.1, 122.8, 122.3, 121.5, 111.6, 38.1, 21.7. HRMS (ESI)  $m/z$  calcd for  $C_{29}H_{23}N_2^+$   $[M+H]^+$  399.1856, found 399.1865.

#### 4-Benzyl-9-chloro-6-phenyl-7H-indolo[2,3-c]quinolone (4i)

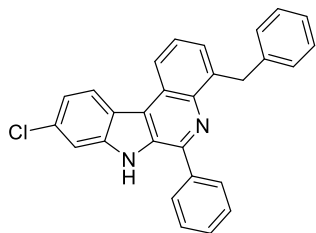

The reaction was conducted with 2-(6-chloro-1*H*-indol-3-yl)cyclohexan-1-one (**1f**, 0.2 mmol, 49.4 mg), benzaldehyde (**2a**, 0.6 mmol, 61.2  $\mu$ L), NH<sub>4</sub>I (0.4 mmol, 58.0 mg), NaHCO<sub>3</sub> (0.2 mmol, 16.8 mg), and DMF (0.6 mL). The reaction vessel stirred at 150 °C for 20 h under oxygen atmosphere. The residue was purified by column chromatography on silica gel (petroleum ether/EtOAc = 10:1) to yield the desired product **4i** as white solid, yield: 54.2 mg (65%).

<sup>1</sup>H NMR (400 MHz, CDCl<sub>3</sub>, ppm):  $\delta$  8.69 (s, 1H), 8.47 (d,  $J$  = 8.2 Hz, 1H), 8.40 (d,  $J$  = 8.6 Hz, 1H), 8.00 (d,  $J$  = 7.1 Hz, 2H), 7.60 (q,  $J$  = 8.3, 7.8 Hz, 3H), 7.56 (d,  $J$  = 7.3 Hz, 1H), 7.52 (s, 1H), 7.47 (d,  $J$  = 7.0 Hz, 1H), 7.39 (d,  $J$  = 7.2 Hz, 2H), 7.33 (d,  $J$  = 8.6 Hz, 1H), 7.27 (t,  $J$  = 7.5 Hz, 2H), 7.18 (t,  $J$  = 7.3 Hz, 1H), 4.80 (s, 2H). <sup>13</sup>C {<sup>1</sup>H} NMR (100 MHz, CDCl<sub>3</sub>, ppm):  $\delta$  144.9, 142.2, 141.6, 141.3, 139.5, 138.6, 132.6, 130.9, 129.4, 129.2, 128.5, 128.2, 126.9, 126.8, 125.7, 124.0, 122.3, 121.6, 121.5, 121.2, 111.9, 38.1. HRMS (ESI)  $m/z$  calcd for C<sub>28</sub>H<sub>20</sub>ClN<sub>2</sub><sup>+</sup> [M+H]<sup>+</sup> 419.1310, found 419.1319.

#### 4-Benzyl-8-methyl-6-phenyl-7H-indolo[2,3-c]quinolone (4j)

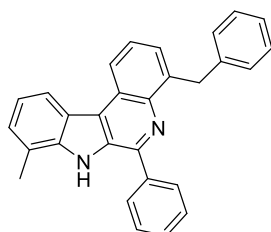

The reaction was conducted with 2-(7-methyl-1*H*-indol-3-yl)cyclohexan-1-one (**1h**, 0.2 mmol, 45.4 mg), benzaldehyde (**2a**, 0.6 mmol, 61.2  $\mu$ L), NH<sub>4</sub>I (0.4 mmol, 58.0 mg), NaHCO<sub>3</sub> (0.2 mmol, 16.8 mg), and DMF (0.6 mL). The reaction vessel stirred at 150 °C for 20 h under oxygen atmosphere. The residue was purified by column chromatography on silica gel (petroleum ether/EtOAc = 10:1) to yield the desired product **4j** as white solid, yield: 40.9 mg (51%), mp 182-185 °C.

<sup>1</sup>H NMR (400 MHz, CDCl<sub>3</sub>, ppm):  $\delta$  8.57 (d,  $J$  = 8.1 Hz, 1H), 8.52 (s, 1H), 8.38 (d,  $J$  = 8.1 Hz, 1H), 8.07 (d,  $J$  = 7.4 Hz, 2H), 7.64 – 7.55 (m, 4H), 7.44 (d,  $J$  = 6.9 Hz, 1H), 7.40 (d,  $J$  = 7.6 Hz, 2H), 7.28 (dd,  $J$  = 15.2, 7.6 Hz, 4H), 7.17 (t,  $J$  = 7.3 Hz, 1H), 4.82 (s, 2H), 2.56 (s, 3H). <sup>13</sup>C {<sup>1</sup>H} NMR (100 MHz, CDCl<sub>3</sub>, ppm):  $\delta$  144.9, 142.3, 141.5, 141.2, 139.0, 138.5, 130.4, 129.4, 129.2, 129.2, 129.2, 128.5, 128.1, 127.2, 126.6, 126.4, 125.6, 124.4, 123.2, 122.5, 121.5, 121.0, 120.8, 38.1, 16.9. HRMS (ESI)  $m/z$  calcd for C<sub>29</sub>H<sub>23</sub>N<sub>2</sub><sup>+</sup> [M+H]<sup>+</sup> 399.1856, found 399.1865.



#### 4-Benzyl-7-methyl-6-phenyl-7H-indolo[2,3-c]quinolone (4k)

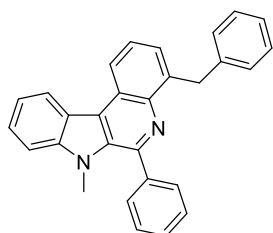

The reaction was conducted with 2-(1-methyl-1*H*-indol-3-yl)cyclohexan-1-one (**1i**, 0.2 mmol, 45.4 mg), benzaldehyde (**2a**, 0.6 mmol, 61.2  $\mu$ L),  $\text{NH}_4\text{I}$  (0.4 mmol, 58.0 mg),  $\text{NaHCO}_3$  (0.2 mmol, 16.8 mg), and DMF (0.6 mL). The reaction vessel stirred at 150  $^\circ\text{C}$  for 20 h under oxygen atmosphere. The residue was purified by column chromatography on silica gel (petroleum ether/EtOAc = 50:1) to yield the desired product **4k** as white solid, yield: 30.0 mg (38%), mp 126-128  $^\circ\text{C}$ .

$^1\text{H}$  NMR (400 MHz,  $\text{CDCl}_3$ , ppm):  $\delta$  8.64 (t,  $J = 9.0$  Hz, 2H), 7.74 (d,  $J = 7.5$  Hz, 2H), 7.64 – 7.52 (m, 6H), 7.44 (t,  $J = 7.0$  Hz, 2H), 7.40 – 7.36 (m, 2H), 7.27 – 7.23 (m, 2H), 7.15 (t,  $J = 7.2$  Hz, 1H), 4.77 (s, 2H), 3.55 (s, 3H).  $^{13}\text{C}$   $\{^1\text{H}\}$  NMR (100 MHz,  $\text{CDCl}_3$ , ppm):  $\delta$  146.3, 142.3, 141.9, 141.1, 140.7, 140.6, 132.5, 129.7, 129.5, 128.6, 128.2, 128.1, 126.7, 126.7, 126.1, 125.5, 124.2, 123.2, 122.9, 122.2, 121.3, 120.5, 110.4, 38.0, 33.6. HRMS (ESI)  $m/z$  calcd for  $\text{C}_{29}\text{H}_{23}\text{N}_2^+$   $[\text{M}+\text{H}]^+$  399.1856, found 399.1860.

#### 5. Crystal data and structure refinement for 3a and 4b

The single crystal of compound **3a** and **4b** were obtained by slowly evaporating a mixture of dichloromethane and petroleum ether solution at ambient temperature.

The single crystal X-ray diffraction data were collected at 150 K by a diffractometer Rigaku Oxford Diffraction Supernova Dual Source, Cu at Zero equipped with an AtlasS2 CCD using Cu  $K\alpha$  radiation (1.54178  $\text{\AA}$ ) by using a  $\omega$  scan mode. The data were collected and processed using CrysAlisPro. The structures were solved by direct methods using Olex2 software with the SHELXT structure solution program via intrinsic phasing algorithm, and the non-hydrogen atoms were located from the trial structure and then refined anisotropically with SHELXL-2018 using a full-matrix least squares procedure based on  $F^2$ . The weighted  $R$  factor,  $wR$  and goodness-of-fit  $S$  values were obtained based on  $F^2$ . Crystallographic data for the structure reported in this paper have been deposited at the Cambridge Crystallographic Data Center.

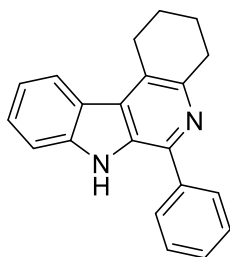

**3a**

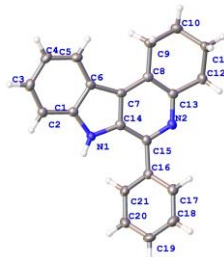

**CCDC: 2032228**

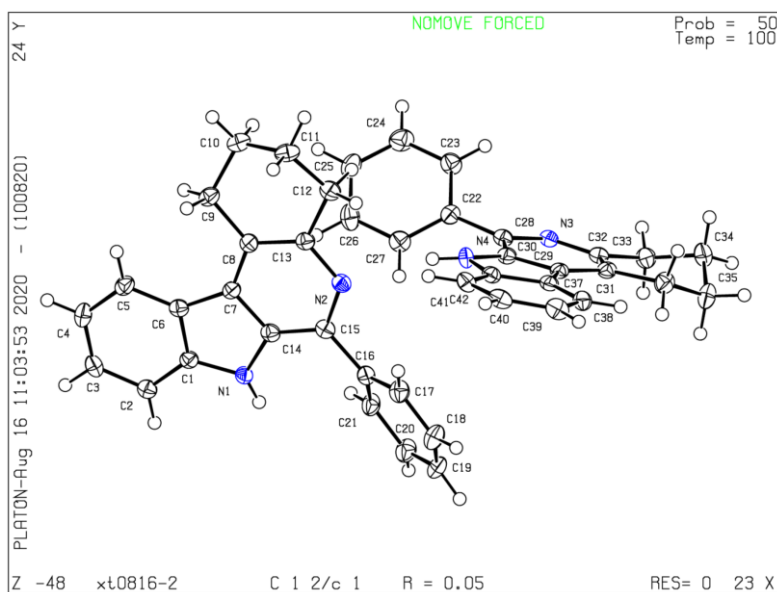

The ellipsoids are shown at 50% probability levels.

**Table 1 Crystal data and structure refinement for 3a.**

|                                  |                   |
|----------------------------------|-------------------|
| Identification code              | <b>3a</b>         |
| Empirical formula                | $C_{42}H_{36}N_4$ |
| Formula weight                   | 596.75            |
| Temperature/K                    | 100.00(10)        |
| Crystal system                   | monoclinic        |
| Space group                      | $C2/c$            |
| $a/\text{\AA}$                   | 25.8205(14)       |
| $b/\text{\AA}$                   | 9.6194(4)         |
| $c/\text{\AA}$                   | 25.2718(13)       |
| $\alpha/^\circ$                  | 90                |
| $\beta/^\circ$                   | 97.967(6)         |
| $\gamma/^\circ$                  | 90                |
| Volume/ $\text{\AA}^3$           | 6216.4(5)         |
| Z                                | 8                 |
| $\rho_{\text{calc}}/\text{cm}^3$ | 1.275             |

|                                                |                                                               |
|------------------------------------------------|---------------------------------------------------------------|
| $\mu/\text{mm}^{-1}$                           | 0.075                                                         |
| F(000)                                         | 2528.0                                                        |
| Crystal size/ $\text{mm}^3$                    | $0.14 \times 0.13 \times 0.12$                                |
| Radiation                                      | Mo $K\alpha$ ( $\lambda = 0.71073$ )                          |
| 2 $\Theta$ range for data collection/ $^\circ$ | 4.228 to 49.994                                               |
| Index ranges                                   | $-30 \leq h \leq 27, -11 \leq k \leq 11, -30 \leq l \leq 29$  |
| Reflections collected                          | 13722                                                         |
| Independent reflections                        | 5481 [ $R_{\text{int}} = 0.0248, R_{\text{sigma}} = 0.0349$ ] |
| Data/restraints/parameters                     | 5481/0/423                                                    |
| Goodness-of-fit on $F^2$                       | 1.047                                                         |
| Final R indexes [ $I \geq 2\sigma(I)$ ]        | $R_1 = 0.0491, wR_2 = 0.1150$                                 |
| Final R indexes [all data]                     | $R_1 = 0.0589, wR_2 = 0.1215$                                 |
| Largest diff. peak/hole / $e \text{ \AA}^{-3}$ | 0.39/-0.23                                                    |

**Table 2 Fractional Atomic Coordinates ( $\times 10^4$ ) and Equivalent Isotropic Displacement Parameters ( $\text{\AA}^2 \times 10^3$ ) for 3a.  $U_{\text{eq}}$  is defined as 1/3 of the trace of the orthogonalised  $U_{ij}$  tensor.**

| Atom | x         | y          | z         | U(eq)   |
|------|-----------|------------|-----------|---------|
| N1   | 4358.5(6) | 4535.7(17) | 3964.0(6) | 19.1(4) |
| N2   | 5794.4(6) | 4120.8(16) | 4064.9(6) | 19.9(4) |
| C1   | 4148.1(7) | 5677.8(19) | 4185.6(7) | 18.7(4) |
| C2   | 3619.8(7) | 5996.6(19) | 4182.4(7) | 21.0(4) |
| C3   | 3502.3(8) | 7185(2)    | 4449.5(8) | 23.9(4) |
| C4   | 3890.6(8) | 8051(2)    | 4698.7(8) | 26.9(5) |
| C5   | 4416.3(8) | 7740(2)    | 4703.0(7) | 23.1(4) |
| C6   | 4551.2(7) | 6531.9(19) | 4439.8(7) | 19.2(4) |
| C7   | 5039.2(7) | 5888.1(18) | 4354.3(7) | 18.3(4) |
| C8   | 5566.4(7) | 6231.8(19) | 4495.8(7) | 19.1(4) |
| C9   | 5735.8(8) | 7517.8(19) | 4814.7(8) | 22.9(4) |
| C10  | 6293.0(8) | 7948(2)    | 4768.3(8) | 27.5(5) |
| C11  | 6661.1(8) | 6714(2)    | 4839.3(8) | 26.3(5) |
| C12  | 6508.8(8) | 5628(2)    | 4416.0(8) | 25.8(5) |
| C13  | 5931.9(7) | 5316.9(19) | 4328.0(7) | 19.6(4) |
| C14  | 4900.2(7) | 4662.0(19) | 4058.1(7) | 20.3(4) |
| C15  | 5289.9(7) | 3765.8(19) | 3933.1(7) | 20.5(4) |
| C16  | 5170.0(7) | 2387.1(19) | 3680.7(7) | 21.0(4) |
| C17  | 5454.1(8) | 1216(2)    | 3875.4(8) | 25.8(4) |
| C18  | 5316.8(9) | -85(2)     | 3669.2(8) | 30.1(5) |
| C19  | 4902.5(8) | -243(2)    | 3268.1(8) | 29.4(5) |

|     |           |            |           |         |
|-----|-----------|------------|-----------|---------|
| C20 | 4631.0(8) | 915(2)     | 3055.5(9) | 30.3(5) |
| C21 | 4767.8(8) | 2224(2)    | 3259.3(8) | 25.3(4) |
| N3  | 6452.8(6) | 3100.9(16) | 1918.6(6) | 18.6(3) |
| N4  | 6553.7(6) | 2810.7(17) | 3388.9(6) | 19.1(4) |
| C22 | 6162.6(7) | 4882.1(19) | 2496.3(7) | 20.9(4) |
| C23 | 6344.4(8) | 6054(2)    | 2248.9(8) | 26.1(5) |
| C24 | 6160.0(9) | 7359(2)    | 2357.2(9) | 31.5(5) |
| C25 | 5800.9(8) | 7519(2)    | 2706.9(8) | 29.3(5) |
| C26 | 5605.9(8) | 6369(2)    | 2940.7(8) | 30.0(5) |
| C27 | 5784.7(8) | 5052(2)    | 2829.9(8) | 25.2(5) |
| C28 | 6390.7(7) | 3493.4(19) | 2416.4(7) | 20.1(4) |
| C29 | 6565.4(7) | 2625.4(19) | 2844.9(7) | 19.7(4) |
| C30 | 6843.6(7) | 1389.9(19) | 2763.3(7) | 18.8(4) |
| C31 | 6915.9(7) | 1014.8(19) | 2242.4(7) | 19.5(4) |
| C32 | 6695.8(7) | 1893.3(19) | 1831.5(7) | 20.0(4) |
| C33 | 6707.5(8) | 1532(2)    | 1254.2(8) | 24.3(4) |
| C34 | 7144.2(8) | 523(2)     | 1176.7(8) | 28.7(5) |
| C35 | 7135.7(9) | -709(2)    | 1550.0(8) | 29.2(5) |
| C36 | 7231.0(8) | -251(2)    | 2130.3(8) | 25.3(4) |
| C37 | 6998.7(7) | 796.6(19)  | 3287.0(7) | 19.2(4) |
| C38 | 7272.1(7) | -401(2)    | 3482.0(8) | 23.6(4) |
| C39 | 7347.2(8) | -644(2)    | 4027.3(8) | 26.0(5) |
| C40 | 7169.2(8) | 292(2)     | 4381.5(8) | 24.7(4) |
| C41 | 6895.2(7) | 1471(2)    | 4206.8(8) | 22.9(4) |
| C42 | 6809.0(7) | 1709.4(19) | 3653.7(7) | 19.4(4) |

**Table 3 Anisotropic Displacement Parameters ( $\text{\AA}^2 \times 10^3$ ) for 3a. The Anisotropic displacement factor exponent takes the form:  $-2\pi^2[h^2a^2U_{11}+2hka*b*U_{12}+\dots]$ .**

| Atom | U <sub>11</sub> | U <sub>22</sub> | U <sub>33</sub> | U <sub>23</sub> | U <sub>13</sub> | U <sub>12</sub> |
|------|-----------------|-----------------|-----------------|-----------------|-----------------|-----------------|
| N1   | 15.7(8)         | 21.0(8)         | 20.6(8)         | -3.1(7)         | 2.3(7)          | -1.1(7)         |
| N2   | 17.5(8)         | 23.1(8)         | 18.9(8)         | 0.1(7)          | 1.4(6)          | -0.8(7)         |
| C1   | 22.3(10)        | 17.7(9)         | 16.4(9)         | 2.2(7)          | 3.8(8)          | -1.3(8)         |
| C2   | 21.0(10)        | 22.9(10)        | 18.9(9)         | 1.5(8)          | 2.4(8)          | -0.9(8)         |
| C3   | 22.6(10)        | 27.8(10)        | 22.6(10)        | 3.7(8)          | 8.2(8)          | 5.0(9)          |
| C4   | 31.5(12)        | 23.6(10)        | 26.3(10)        | -2.8(8)         | 6.6(9)          | 7.7(9)          |
| C5   | 30.0(11)        | 20.1(10)        | 19.2(10)        | -2.4(8)         | 3.5(8)          | -2.1(9)         |
| C6   | 21.8(10)        | 19.6(9)         | 16.2(9)         | 3.3(8)          | 2.5(8)          | -1.6(8)         |
| C7   | 24.4(10)        | 16.5(9)         | 14.4(9)         | 0.8(7)          | 3.6(8)          | -1.8(8)         |
| C8   | 24.4(10)        | 19.7(9)         | 13.8(9)         | 1.9(7)          | 4.3(8)          | -0.7(8)         |

|     |          |          |          |          |         |          |
|-----|----------|----------|----------|----------|---------|----------|
| C9  | 28.6(11) | 20.0(10) | 19.8(10) | -1.3(8)  | 1.9(8)  | -2.8(8)  |
| C10 | 30.2(11) | 21.8(10) | 29.9(11) | -1.3(9)  | 1.9(9)  | -6.1(9)  |
| C11 | 24.4(11) | 24.1(10) | 28.2(11) | 2.4(9)   | -4.5(9) | -5.7(9)  |
| C12 | 20.0(10) | 27.6(11) | 29.7(11) | -1.0(9)  | 3.2(9)  | -1.5(9)  |
| C13 | 21.5(10) | 20.4(9)  | 16.9(9)  | 0.8(8)   | 2.6(8)  | -2.3(8)  |
| C14 | 22.7(10) | 21.6(9)  | 17.1(9)  | 2.6(8)   | 4.2(8)  | -1.6(8)  |
| C15 | 20.2(10) | 23.2(10) | 18.0(9)  | 2.3(8)   | 1.7(8)  | -0.4(8)  |
| C16 | 20.4(10) | 22.2(10) | 21.0(10) | -1.1(8)  | 4.9(8)  | 0.5(8)   |
| C17 | 25.9(11) | 28.7(11) | 22.1(10) | -2.0(8)  | 1.5(8)  | 2.4(9)   |
| C18 | 37.2(12) | 22.7(10) | 29.7(11) | -2.1(9)  | 1.9(10) | 6.9(9)   |
| C19 | 34.0(12) | 20.7(10) | 33.8(11) | -9.6(9)  | 5.8(10) | -0.5(9)  |
| C20 | 24.1(11) | 33.0(12) | 31.9(11) | -11.7(9) | -2.3(9) | 1.1(9)   |
| C21 | 22.7(10) | 24.3(10) | 28.4(11) | -4.0(9)  | 2.1(9)  | 5.8(9)   |
| N3  | 16.6(8)  | 20.8(8)  | 18.6(8)  | 0.7(6)   | 2.9(6)  | -2.2(7)  |
| N4  | 19.9(8)  | 21.4(8)  | 16.7(8)  | -1.5(7)  | 5.1(7)  | 4.4(7)   |
| C22 | 19.0(10) | 21.2(10) | 21.3(10) | -0.6(8)  | -1.7(8) | 1.3(8)   |
| C23 | 26.0(11) | 26.6(11) | 26.0(10) | 4.1(9)   | 5.4(9)  | 2.0(9)   |
| C24 | 34.6(12) | 23.8(11) | 35.5(12) | 7.6(9)   | 3.5(10) | 1.3(9)   |
| C25 | 34.2(12) | 20.3(10) | 32.8(12) | -0.1(9)  | 2.6(10) | 8.7(9)   |
| C26 | 30.5(12) | 33.1(11) | 27.1(11) | 2.5(9)   | 6.2(9)  | 11.8(10) |
| C27 | 26.6(11) | 24.8(10) | 23.9(10) | 4.0(8)   | 3.1(9)  | 1.3(9)   |
| C28 | 16.7(9)  | 22.3(10) | 21.2(10) | 0.3(8)   | 2.3(8)  | -2.7(8)  |
| C29 | 16.7(9)  | 20.5(9)  | 21.5(10) | -1.0(8)  | 1.3(8)  | -2.6(8)  |
| C30 | 12.8(9)  | 17.5(9)  | 25.5(10) | 0.0(8)   | 1.1(8)  | -1.3(8)  |
| C31 | 14.9(9)  | 19.6(9)  | 23.1(10) | -0.4(8)  | -0.3(8) | -1.6(8)  |
| C32 | 16.1(9)  | 21.3(10) | 22.5(10) | -0.2(8)  | 2.2(8)  | -3.2(8)  |
| C33 | 26.2(11) | 25.6(10) | 21.3(10) | 0.0(8)   | 4.2(8)  | -0.5(9)  |
| C34 | 29.0(12) | 32.5(11) | 26.6(11) | -2.9(9)  | 10.6(9) | 3.3(9)   |
| C35 | 31.7(12) | 26.9(11) | 28.7(11) | -6.6(9)  | 3.1(9)  | 8.4(9)   |
| C36 | 21.5(10) | 24.5(10) | 28.9(11) | -1.7(9)  | -0.5(9) | 3.6(9)   |
| C37 | 14.3(9)  | 19.5(9)  | 24.1(10) | -0.1(8)  | 3.4(8)  | -2.7(8)  |
| C38 | 19.7(10) | 21.2(10) | 30.4(11) | 0.4(8)   | 5.5(9)  | 2.6(8)   |
| C39 | 22.1(10) | 26.7(10) | 28.5(11) | 10.1(9)  | 0.7(9)  | 4.1(9)   |
| C40 | 20.4(10) | 31.0(11) | 22.2(10) | 7.3(9)   | 1.2(8)  | -2.2(9)  |
| C41 | 21.2(10) | 26.6(10) | 21.9(10) | 2.2(8)   | 6.4(8)  | 0.4(9)   |
| C42 | 15.6(9)  | 19.5(9)  | 23.5(10) | 1.9(8)   | 3.9(8)  | -0.8(8)  |

**Table 4 Bond Lengths for 3a.**

**Atom Atom Length/Å Atom Atom Length/Å**

|     |     |          |     |     |          |
|-----|-----|----------|-----|-----|----------|
| N1  | C1  | 1.378(2) | N3  | C28 | 1.344(2) |
| N1  | C14 | 1.391(2) | N3  | C32 | 1.353(2) |
| N2  | C13 | 1.351(2) | N4  | C29 | 1.391(2) |
| N2  | C15 | 1.343(2) | N4  | C42 | 1.372(2) |
| C1  | C2  | 1.397(3) | C22 | C23 | 1.401(3) |
| C1  | C6  | 1.409(3) | C22 | C27 | 1.385(3) |
| C2  | C3  | 1.383(3) | C22 | C28 | 1.485(3) |
| C3  | C4  | 1.386(3) | C23 | C24 | 1.384(3) |
| C4  | C5  | 1.388(3) | C24 | C25 | 1.376(3) |
| C5  | C6  | 1.407(3) | C25 | C26 | 1.382(3) |
| C6  | C7  | 1.447(3) | C26 | C27 | 1.390(3) |
| C7  | C8  | 1.398(3) | C28 | C29 | 1.392(3) |
| C7  | C14 | 1.416(3) | C29 | C30 | 1.419(3) |
| C8  | C9  | 1.508(3) | C30 | C31 | 1.402(3) |
| C8  | C13 | 1.399(3) | C30 | C37 | 1.446(3) |
| C9  | C10 | 1.517(3) | C31 | C32 | 1.397(3) |
| C10 | C11 | 1.516(3) | C31 | C36 | 1.513(3) |
| C11 | C12 | 1.508(3) | C32 | C33 | 1.504(3) |
| C12 | C13 | 1.505(3) | C33 | C34 | 1.521(3) |
| C14 | C15 | 1.394(3) | C34 | C35 | 1.517(3) |
| C15 | C16 | 1.485(3) | C35 | C36 | 1.518(3) |
| C16 | C17 | 1.396(3) | C37 | C38 | 1.404(3) |
| C16 | C21 | 1.390(3) | C37 | C42 | 1.413(3) |
| C17 | C18 | 1.383(3) | C38 | C39 | 1.385(3) |
| C18 | C19 | 1.376(3) | C39 | C40 | 1.392(3) |
| C19 | C20 | 1.385(3) | C40 | C41 | 1.377(3) |
| C20 | C21 | 1.387(3) | C41 | C42 | 1.403(3) |

**Table 5 Bond Angles for 3a.**

| Atom | Atom | Atom | Angle/°    | Atom | Atom | Atom | Angle/°    |
|------|------|------|------------|------|------|------|------------|
| C1   | N1   | C14  | 107.73(16) | C28  | N3   | C32  | 120.78(16) |
| C15  | N2   | C13  | 121.22(16) | C42  | N4   | C29  | 107.96(16) |
| N1   | C1   | C2   | 127.73(17) | C23  | C22  | C28  | 119.95(17) |
| N1   | C1   | C6   | 110.01(16) | C27  | C22  | C23  | 119.01(18) |
| C2   | C1   | C6   | 122.25(17) | C27  | C22  | C28  | 120.99(17) |
| C3   | C2   | C1   | 117.31(18) | C24  | C23  | C22  | 119.73(18) |
| C2   | C3   | C4   | 121.67(18) | C25  | C24  | C23  | 120.66(19) |
| C3   | C4   | C5   | 121.25(18) | C24  | C25  | C26  | 120.20(19) |
| C4   | C5   | C6   | 118.70(18) | C25  | C26  | C27  | 119.54(19) |

|     |     |     |            |     |     |     |            |
|-----|-----|-----|------------|-----|-----|-----|------------|
| C1  | C6  | C7  | 106.60(16) | C22 | C27 | C26 | 120.77(19) |
| C5  | C6  | C1  | 118.80(17) | N3  | C28 | C22 | 118.75(16) |
| C5  | C6  | C7  | 134.60(18) | N3  | C28 | C29 | 119.45(17) |
| C8  | C7  | C6  | 134.24(17) | C29 | C28 | C22 | 121.72(17) |
| C8  | C7  | C14 | 119.91(17) | N4  | C29 | C28 | 130.01(17) |
| C14 | C7  | C6  | 105.86(16) | N4  | C29 | C30 | 109.38(16) |
| C7  | C8  | C9  | 122.06(17) | C28 | C29 | C30 | 120.37(17) |
| C7  | C8  | C13 | 116.59(17) | C29 | C30 | C37 | 106.22(16) |
| C13 | C8  | C9  | 121.36(17) | C31 | C30 | C29 | 119.21(17) |
| C8  | C9  | C10 | 112.98(16) | C31 | C30 | C37 | 134.56(17) |
| C11 | C10 | C9  | 111.28(16) | C30 | C31 | C36 | 121.87(17) |
| C12 | C11 | C10 | 111.17(17) | C32 | C31 | C30 | 116.67(17) |
| C13 | C12 | C11 | 113.44(16) | C32 | C31 | C36 | 121.44(17) |
| N2  | C13 | C8  | 122.85(17) | N3  | C32 | C31 | 123.27(17) |
| N2  | C13 | C12 | 115.41(16) | N3  | C32 | C33 | 115.36(16) |
| C8  | C13 | C12 | 121.71(17) | C31 | C32 | C33 | 121.36(17) |
| N1  | C14 | C7  | 109.77(16) | C32 | C33 | C34 | 112.78(17) |
| N1  | C14 | C15 | 130.35(17) | C35 | C34 | C33 | 110.10(16) |
| C15 | C14 | C7  | 119.78(18) | C34 | C35 | C36 | 111.08(17) |
| N2  | C15 | C14 | 119.48(17) | C31 | C36 | C35 | 113.26(16) |
| N2  | C15 | C16 | 118.09(16) | C38 | C37 | C30 | 134.99(18) |
| C14 | C15 | C16 | 122.36(17) | C38 | C37 | C42 | 118.88(17) |
| C17 | C16 | C15 | 120.05(17) | C42 | C37 | C30 | 106.13(16) |
| C21 | C16 | C15 | 121.29(17) | C39 | C38 | C37 | 118.82(18) |
| C21 | C16 | C17 | 118.64(18) | C38 | C39 | C40 | 121.16(18) |
| C18 | C17 | C16 | 120.17(19) | C41 | C40 | C39 | 121.85(18) |
| C19 | C18 | C17 | 120.68(19) | C40 | C41 | C42 | 117.21(18) |
| C18 | C19 | C20 | 119.78(19) | N4  | C42 | C37 | 110.29(16) |
| C19 | C20 | C21 | 119.79(19) | N4  | C42 | C41 | 127.65(17) |
| C20 | C21 | C16 | 120.82(19) | C41 | C42 | C37 | 122.04(17) |

**Table 6 Torsion Angles for 3a.**

| A  | B   | C   | D   | Angle/°     | A   | B   | C   | D   | Angle/°     |
|----|-----|-----|-----|-------------|-----|-----|-----|-----|-------------|
| N1 | C1  | C2  | C3  | 177.72(17)  | N3  | C28 | C29 | N4  | 178.75(18)  |
| N1 | C1  | C6  | C5  | -178.50(16) | N3  | C28 | C29 | C30 | 5.0(3)      |
| N1 | C1  | C6  | C7  | 1.7(2)      | N3  | C32 | C33 | C34 | 157.90(16)  |
| N1 | C14 | C15 | N2  | 179.77(17)  | N4  | C29 | C30 | C31 | -178.37(16) |
| N1 | C14 | C15 | C16 | -3.3(3)     | N4  | C29 | C30 | C37 | 0.9(2)      |
| N2 | C15 | C16 | C17 | 42.6(2)     | C22 | C23 | C24 | C25 | 0.2(3)      |

|                 |             |                 |             |
|-----------------|-------------|-----------------|-------------|
| N2 C15C16C21    | -139.17(19) | C22 C28 C29 N4  | 2.2(3)      |
| C1 N1 C14C7     | 1.3(2)      | C22 C28 C29 C30 | -171.61(17) |
| C1 N1 C14C15    | 177.49(19)  | C23 C22 C27 C26 | -3.2(3)     |
| C1 C2 C3 C4     | 1.7(3)      | C23 C22 C28 N3  | -46.5(3)    |
| C1 C6 C7 C8     | 178.82(19)  | C23 C22 C28 C29 | 130.1(2)    |
| C1 C6 C7 C14    | -0.90(19)   | C23 C24 C25 C26 | -2.3(3)     |
| C2 C1 C6 C5     | 0.5(3)      | C24 C25 C26 C27 | 1.5(3)      |
| C2 C1 C6 C7     | -179.25(16) | C25 C26 C27 C22 | 1.2(3)      |
| C2 C3 C4 C5     | -1.8(3)     | C27 C22 C23 C24 | 2.5(3)      |
| C3 C4 C5 C6     | 1.1(3)      | C27 C22 C28 N3  | 136.02(19)  |
| C4 C5 C6 C1     | -0.5(3)     | C27 C22 C28 C29 | -47.4(3)    |
| C4 C5 C6 C7     | 179.23(19)  | C28 N3 C32 C31  | -2.9(3)     |
| C5 C6 C7 C8     | -0.9(4)     | C28 N3 C32 C33  | 176.08(16)  |
| C5 C6 C7 C14    | 179.4(2)    | C28 C22 C23 C24 | -175.00(19) |
| C6 C1 C2 C3     | -1.1(3)     | C28 C22 C27 C26 | 174.24(18)  |
| C6 C7 C8 C9     | 0.8(3)      | C28 C29 C30 C31 | -3.4(3)     |
| C6 C7 C8 C13    | -179.38(18) | C28 C29 C30 C37 | 175.87(17)  |
| C6 C7 C14 N1    | -0.2(2)     | C29 N4 C42 C37  | 0.9(2)      |
| C6 C7 C14 C15   | -176.90(16) | C29 N4 C42 C41  | 179.47(18)  |
| C7 C8 C9 C10    | -160.93(17) | C29 C30 C31 C32 | -1.1(3)     |
| C7 C8 C13 N2    | -3.2(3)     | C29 C30 C31 C36 | 176.99(17)  |
| C7 C8 C13 C12   | 174.97(17)  | C29 C30 C37 C38 | 179.1(2)    |
| C7 C14 C15 N2   | -4.3(3)     | C29 C30 C37 C42 | -0.4(2)     |
| C7 C14 C15 C16  | 172.61(16)  | C30 C31 C32 N3  | 4.3(3)      |
| C8 C7 C14 N1    | -179.97(16) | C30 C31 C32 C33 | -174.61(17) |
| C8 C7 C14 C15   | 3.3(3)      | C30 C31 C36 C35 | 163.50(18)  |
| C8 C9 C10 C11   | -46.5(2)    | C30 C37 C38 C39 | -179.6(2)   |
| C9 C8 C13 N2    | 176.62(17)  | C30 C37 C42 N4  | -0.3(2)     |
| C9 C8 C13 C12   | -5.2(3)     | C30 C37 C42 C41 | -178.98(17) |
| C9 C10 C11 C12  | 61.0(2)     | C31 C30 C37 C38 | -1.7(4)     |
| C10 C11 C12 C13 | -45.8(2)    | C31 C30 C37 C42 | 178.8(2)    |
| C11 C12 C13 N2  | -163.13(16) | C31 C32 C33 C34 | -23.1(3)    |
| C11 C12 C13 C8  | 18.6(3)     | C32 N3 C28 C22  | 174.83(16)  |
| C13 N2 C15 C14  | 1.6(3)      | C32 N3 C28 C29  | -1.9(3)     |
| C13 N2 C15 C16  | -175.49(16) | C32 C31 C36 C35 | -18.5(3)    |
| C13 C8 C9 C10   | 19.3(2)     | C32 C33 C34 C35 | 49.7(2)     |
| C14 N1 C1 C2    | 179.18(18)  | C33 C34 C35 C36 | -62.2(2)    |
| C14 N1 C1 C6    | -1.8(2)     | C34 C35 C36 C31 | 45.6(2)     |
| C14 C7 C8 C9    | -179.47(16) | C36 C31 C32 N3  | -173.75(17) |
| C14 C7 C8 C13   | 0.3(2)      | C36 C31 C32 C33 | 7.3(3)      |



|                |             |                 |             |
|----------------|-------------|-----------------|-------------|
| C14C15C16C17   | -134.4(2)   | C37 C30 C31 C32 | 179.86(19)  |
| C14C15C16C21   | 43.9(3)     | C37 C30 C31 C36 | -2.1(3)     |
| C15 N2 C13 C8  | 2.3(3)      | C37 C38 C39 C40 | -1.7(3)     |
| C15 N2 C13 C12 | -175.96(16) | C38 C37 C42 N4  | -179.91(16) |
| C15 C16C17C18  | 174.92(18)  | C38 C37 C42 C41 | 1.4(3)      |
| C15 C16C21 C20 | -174.65(18) | C38 C39 C40 C41 | 2.4(3)      |
| C16C17C18C19   | 0.5(3)      | C39 C40 C41 C42 | -1.1(3)     |
| C17 C16C21 C20 | 3.6(3)      | C40 C41 C42 N4  | -179.22(18) |
| C17 C18C19 C20 | 2.2(3)      | C40 C41 C42 C37 | -0.8(3)     |
| C18 C19C20 C21 | -2.0(3)     | C42 N4 C29 C28  | -175.43(19) |
| C19 C20C21 C16 | -1.0(3)     | C42 N4 C29 C30  | -1.1(2)     |
| C21 C16C17 C18 | -3.4(3)     | C42 C37 C38 C39 | -0.1(3)     |

**Table 7 Hydrogen Atom Coordinates ( $\text{\AA} \times 10^4$ ) and Isotropic Displacement Parameters ( $\text{\AA}^2 \times 10^3$ ) for 3a.**

| Atom | x       | y        | z       | U(eq) |
|------|---------|----------|---------|-------|
| H1   | 4180(8) | 3980(20) | 3753(9) | 24(6) |
| H2   | 3357.72 | 5432.04  | 4007.68 | 25    |
| H3   | 3153.83 | 7409.3   | 4462.21 | 29    |
| H4A  | 3797.34 | 8856.28  | 4866.2  | 32    |
| H5   | 4674.17 | 8319.37  | 4876.45 | 28    |
| H9A  | 5705.72 | 7348.77  | 5187.64 | 28    |
| H9B  | 5501.91 | 8276.46  | 4692.52 | 28    |
| H10A | 6304.84 | 8363.05  | 4420.34 | 33    |
| H10B | 6406.92 | 8641.91  | 5037.92 | 33    |
| H11A | 7015.18 | 7025.07  | 4819.47 | 32    |
| H11B | 6653.68 | 6307.79  | 5189.49 | 32    |
| H12A | 6613.75 | 5943.4   | 4082.14 | 31    |
| H12B | 6698.21 | 4776.93  | 4518.23 | 31    |
| H17  | 5736.45 | 1311.73  | 4144.54 | 31    |
| H18  | 5506.41 | -860.45  | 3802.92 | 36    |
| H19  | 4805.23 | -1125.3  | 3140.41 | 35    |
| H20  | 4357.7  | 816.37   | 2776.86 | 36    |
| H21  | 4588.21 | 3000.97  | 3112.06 | 30    |
| H4   | 6357(8) | 3320(20) | 3525(8) | 20(6) |
| H23  | 6588.02 | 5954.33  | 2012.8  | 31    |
| H24  | 6279.99 | 8135.74  | 2191.8  | 38    |
| H25  | 5688.95 | 8404.45  | 2786.3  | 35    |
| H26  | 5356.93 | 6475.32  | 3170.6  | 36    |

|      |         |          |         |    |
|------|---------|----------|---------|----|
| H27  | 5648.84 | 4275.35  | 2981.58 | 30 |
| H33A | 6751.82 | 2377.73  | 1056.28 | 29 |
| H33B | 6374.68 | 1123.36  | 1108.44 | 29 |
| H34A | 7100.27 | 201.72   | 809.44  | 34 |
| H34B | 7479.04 | 992.68   | 1248.98 | 34 |
| H35A | 7403.25 | -1369.29 | 1483.83 | 35 |
| H35B | 6799.2  | -1170.36 | 1479.01 | 35 |
| H36A | 7144    | -1012.07 | 2353.91 | 30 |
| H36B | 7599.84 | -46.63   | 2227.01 | 30 |
| H38  | 7400.37 | -1019.92 | 3249    | 28 |
| H39  | 7519.46 | -1447.53 | 4159.23 | 31 |
| H40  | 7237.44 | 116.61   | 4746.41 | 30 |
| H41  | 6772.25 | 2084.43  | 4445.34 | 28 |

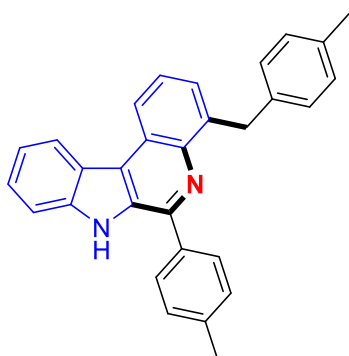

**4b**

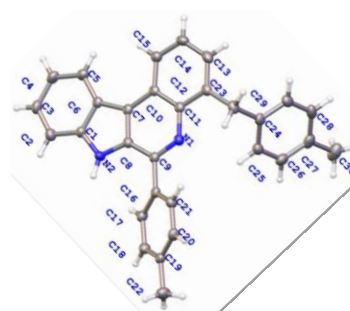

CCDC: 2060139

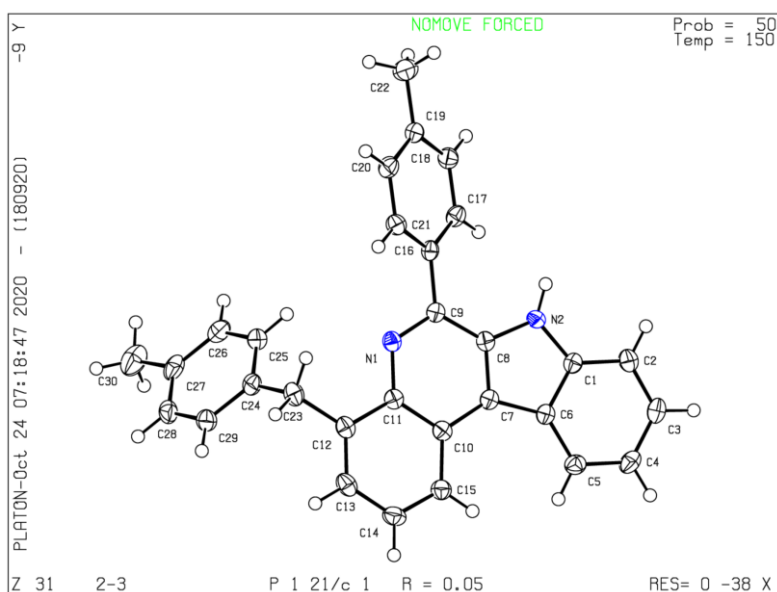

The ellipsoids are shown at 50% probability levels.

**Table 1 Crystal data and structure refinement for 4b.**

|                                             |                                                               |
|---------------------------------------------|---------------------------------------------------------------|
| Identification code                         | <b>4b</b>                                                     |
| Empirical formula                           | C <sub>30</sub> H <sub>24</sub> N <sub>2</sub>                |
| Formula weight                              | 412.51                                                        |
| Temperature/K                               | 149.99(10)                                                    |
| Crystal system                              | monoclinic                                                    |
| Space group                                 | P2 <sub>1</sub> /c                                            |
| a/Å                                         | 15.7202(8)                                                    |
| b/Å                                         | 11.7394(7)                                                    |
| c/Å                                         | 11.6984(6)                                                    |
| α/°                                         | 90                                                            |
| β/°                                         | 96.880(5)                                                     |
| γ/°                                         | 90                                                            |
| Volume/Å <sup>3</sup>                       | 2143.3(2)                                                     |
| Z                                           | 4                                                             |
| ρ <sub>calc</sub> /cm <sup>3</sup>          | 1.278                                                         |
| μ/mm <sup>-1</sup>                          | 0.074                                                         |
| F(000)                                      | 872.0                                                         |
| Crystal size/mm <sup>3</sup>                | 0.14 × 0.13 × 0.12                                            |
| Radiation                                   | Mo Kα (λ = 0.71073)                                           |
| 2θ range for data collection/°              | 4.342 to 49.988                                               |
| Index ranges                                | -18 ≤ h ≤ 18, -11 ≤ k ≤ 13, -13 ≤ l ≤ 13                      |
| Reflections collected                       | 10160                                                         |
| Independent reflections                     | 3764 [R <sub>int</sub> = 0.0330, R <sub>sigma</sub> = 0.0416] |
| Data/restraints/parameters                  | 3764/0/295                                                    |
| Goodness-of-fit on F <sup>2</sup>           | 1.064                                                         |
| Final R indexes [I ≥ 2σ (I)]                | R <sub>1</sub> = 0.0456, wR <sub>2</sub> = 0.1045             |
| Final R indexes [all data]                  | R <sub>1</sub> = 0.0576, wR <sub>2</sub> = 0.1122             |
| Largest diff. peak/hole / e Å <sup>-3</sup> | 0.25/-0.26                                                    |

**Table 2 Fractional Atomic Coordinates (×10<sup>4</sup>) and Equivalent Isotropic Displacement Parameters (Å<sup>2</sup>×10<sup>3</sup>) for 4b. U<sub>eq</sub> is defined as 1/3 of the trace of the orthogonalised U<sub>ij</sub> tensor.**

| Atom | x          | y          | z          | U(eq)   |
|------|------------|------------|------------|---------|
| N1   | 3062.5(8)  | 4521.7(12) | 3586.4(11) | 21.6(3) |
| N2   | 4706.1(9)  | 5610.2(13) | 1870.9(12) | 23.2(3) |
| C1   | 5559.7(10) | 5311.1(14) | 2092.0(14) | 21.8(4) |
| C2   | 6241.5(11) | 5678.5(16) | 1532.5(15) | 26.7(4) |

|     |            |            |            |         |
|-----|------------|------------|------------|---------|
| C3  | 7037.7(11) | 5239.5(16) | 1903.8(15) | 28.4(4) |
| C4  | 7153.6(11) | 4454.9(16) | 2804.4(16) | 28.6(4) |
| C5  | 6478.2(10) | 4099.2(15) | 3367.1(15) | 25.2(4) |
| C6  | 5657.9(10) | 4532.9(14) | 3014.4(14) | 20.3(4) |
| C7  | 4814.2(10) | 4375.1(14) | 3364.6(14) | 19.6(4) |
| C8  | 4255.0(10) | 5045.8(14) | 2639.8(13) | 20.2(4) |
| C9  | 3368.6(10) | 5105.8(14) | 2762.0(14) | 19.8(4) |
| C10 | 4486.9(10) | 3743.8(14) | 4250.0(13) | 20.5(4) |
| C11 | 3591.2(10) | 3852.3(14) | 4325.9(14) | 20.9(4) |
| C12 | 3218.4(11) | 3268.0(15) | 5209.2(14) | 22.8(4) |
| C13 | 3734.3(11) | 2614.2(15) | 5977.4(15) | 26.9(4) |
| C14 | 4616.3(11) | 2507.9(16) | 5908.5(15) | 28.1(4) |
| C15 | 4985.7(11) | 3060.9(15) | 5064.9(15) | 24.6(4) |
| C16 | 2752.7(10) | 5825.1(14) | 2028.0(14) | 20.6(4) |
| C17 | 2810.0(10) | 6034.9(15) | 866.2(14)  | 24.0(4) |
| C18 | 2203.0(10) | 6702.1(15) | 221.4(15)  | 25.3(4) |
| C19 | 1519.5(10) | 7177.8(15) | 699.5(15)  | 24.0(4) |
| C20 | 1462.1(11) | 6958.0(15) | 1852.2(15) | 26.2(4) |
| C21 | 2062.8(11) | 6301.9(15) | 2504.1(15) | 25.2(4) |
| C22 | 854.4(11)  | 7896.7(18) | 2.3(16)    | 36.0(5) |
| C23 | 2269.2(11) | 3386.7(16) | 5316.2(15) | 26.9(4) |
| C24 | 1713.7(10) | 2519.6(15) | 4626.0(15) | 24.2(4) |
| C25 | 1419.3(10) | 2691.5(16) | 3470.2(15) | 27.4(4) |
| C26 | 922.6(11)  | 1884.5(17) | 2844.6(16) | 30.9(4) |
| C27 | 694.5(11)  | 870.5(16)  | 3338.0(17) | 31.0(4) |
| C28 | 974.6(11)  | 709.1(16)  | 4498.2(17) | 29.9(4) |
| C29 | 1477.2(11) | 1509.5(15) | 5125.4(15) | 27.7(4) |
| C30 | 185.2(13)  | -32.2(19)  | 2646(2)    | 46.5(6) |

**Table 3 Anisotropic Displacement Parameters ( $\text{\AA}^2 \times 10^3$ ) for 4b. The Anisotropic displacement factor exponent takes the form:  $-2\pi^2[h^2a^{*2}U_{11}+2hka^*b^*U_{12}+\dots]$ .**

| Atom | $U_{11}$ | $U_{22}$ | $U_{33}$ | $U_{23}$ | $U_{13}$ | $U_{12}$ |
|------|----------|----------|----------|----------|----------|----------|
| N1   | 22.7(7)  | 22.4(8)  | 20.2(7)  | -0.4(6)  | 4.0(6)   | -2.1(6)  |
| N2   | 21.3(7)  | 26.7(8)  | 22.1(8)  | 7.8(7)   | 3.8(6)   | 1.6(7)   |
| C1   | 20.1(8)  | 22.1(9)  | 23.4(9)  | -2.2(7)  | 3.0(7)   | -1.0(7)  |
| C2   | 27.7(9)  | 28.3(10) | 25.1(9)  | 1.3(8)   | 7.4(8)   | -2.8(8)  |
| C3   | 22.0(9)  | 33.2(11) | 31.2(10) | -4.1(9)  | 8.5(8)   | -4.4(8)  |
| C4   | 19.4(8)  | 30.0(10) | 36.2(11) | -4.9(9)  | 2.9(8)   | 2.9(8)   |
| C5   | 24.9(9)  | 22.2(9)  | 27.8(10) | -1.0(8)  | 0.7(7)   | 1.6(8)   |

|     |          |          |          |           |         |          |
|-----|----------|----------|----------|-----------|---------|----------|
| C6  | 21.1(8)  | 19.4(9)  | 20.3(9)  | -4.1(7)   | 1.8(7)  | -2.1(7)  |
| C7  | 20.9(8)  | 19.0(9)  | 18.7(8)  | -4.6(7)   | 1.6(7)  | -1.7(7)  |
| C8  | 22.3(8)  | 21.0(9)  | 17.6(8)  | -1.7(7)   | 3.3(7)  | -2.0(7)  |
| C9  | 20.5(8)  | 19.6(9)  | 19.3(8)  | -2.9(7)   | 2.5(7)  | -1.0(7)  |
| C10 | 24.4(8)  | 18.7(9)  | 17.8(8)  | -3.5(7)   | 0.2(7)  | -3.0(7)  |
| C11 | 23.2(8)  | 20.6(9)  | 18.6(8)  | -3.2(7)   | 1.8(7)  | -2.0(7)  |
| C12 | 27.7(9)  | 20.8(9)  | 20.1(9)  | -3.0(7)   | 3.4(7)  | -4.6(8)  |
| C13 | 35.6(10) | 25.4(10) | 20.2(9)  | 0.6(8)    | 5.6(8)  | -5.4(8)  |
| C14 | 33.0(10) | 25.3(10) | 24.4(9)  | 4.0(8)    | -3.3(8) | 0.1(8)   |
| C15 | 25.0(9)  | 23.1(9)  | 25.2(9)  | 0.8(8)    | 0.6(7)  | -1.1(8)  |
| C16 | 19.1(8)  | 20.9(9)  | 21.5(9)  | -2.1(7)   | 1.8(7)  | -3.6(7)  |
| C17 | 20.2(8)  | 29.2(10) | 23.0(9)  | -2.6(8)   | 3.8(7)  | -0.3(8)  |
| C18 | 25.5(9)  | 30.3(10) | 19.9(9)  | 1.0(8)    | 2.0(7)  | -2.6(8)  |
| C19 | 21.3(8)  | 23.9(9)  | 26.1(9)  | 1.3(8)    | 0.3(7)  | -3.0(7)  |
| C20 | 21.6(8)  | 28.5(10) | 29.5(10) | -0.4(8)   | 6.9(8)  | 2.5(8)   |
| C21 | 25.8(9)  | 28.9(10) | 21.5(9)  | 2.8(8)    | 5.6(7)  | 0.3(8)   |
| C22 | 29.5(10) | 45.1(12) | 33.2(11) | 6.9(10)   | 2.9(8)  | 6.7(9)   |
| C23 | 30.5(9)  | 28.3(10) | 23.5(9)  | -0.6(8)   | 10.2(8) | -2.0(8)  |
| C24 | 20.1(8)  | 28.1(10) | 25.9(10) | -0.4(8)   | 9.5(7)  | 1.8(8)   |
| C25 | 23.8(9)  | 29.3(10) | 29.7(10) | 4.9(8)    | 5.5(8)  | -0.2(8)  |
| C26 | 21.7(9)  | 40.9(12) | 29.6(10) | -0.6(9)   | 1.1(8)  | 2.3(9)   |
| C27 | 18.3(8)  | 31.4(11) | 44.2(12) | -8.1(9)   | 7.0(8)  | 1.5(8)   |
| C28 | 23.6(9)  | 22.5(10) | 45.4(12) | 2.5(9)    | 12.3(8) | 0.6(8)   |
| C29 | 25.7(9)  | 31.2(10) | 27.5(10) | 4.0(8)    | 9.0(8)  | 2.3(8)   |
| C30 | 32.3(11) | 41.8(13) | 64.9(15) | -15.6(12) | 3.8(10) | -1.5(10) |

**Table 4 Bond Lengths for 4b.**

| Atom | Atom | Length/Å | Atom | Atom | Length/Å |
|------|------|----------|------|------|----------|
| N1   | C9   | 1.320(2) | C12  | C23  | 1.519(2) |
| N1   | C11  | 1.373(2) | C13  | C14  | 1.404(2) |
| N2   | C1   | 1.381(2) | C14  | C15  | 1.367(2) |
| N2   | C8   | 1.380(2) | C16  | C17  | 1.395(2) |
| C1   | C2   | 1.390(2) | C16  | C21  | 1.394(2) |
| C1   | C6   | 1.408(2) | C17  | C18  | 1.386(2) |
| C2   | C3   | 1.375(2) | C18  | C19  | 1.387(2) |
| C3   | C4   | 1.395(3) | C19  | C20  | 1.386(2) |
| C4   | C5   | 1.379(2) | C19  | C22  | 1.505(2) |
| C5   | C6   | 1.402(2) | C20  | C21  | 1.376(2) |
| C6   | C7   | 1.446(2) | C23  | C24  | 1.511(2) |

|     |     |          |     |     |          |
|-----|-----|----------|-----|-----|----------|
| C7  | C8  | 1.390(2) | C24 | C25 | 1.390(2) |
| C7  | C10 | 1.419(2) | C24 | C29 | 1.392(2) |
| C8  | C9  | 1.419(2) | C25 | C26 | 1.380(3) |
| C9  | C16 | 1.479(2) | C26 | C27 | 1.389(3) |
| C10 | C11 | 1.427(2) | C27 | C28 | 1.389(3) |
| C10 | C15 | 1.410(2) | C27 | C30 | 1.505(3) |
| C11 | C12 | 1.424(2) | C28 | C29 | 1.381(3) |
| C12 | C13 | 1.371(2) |     |     |          |

**Table 5 Bond Angles for 4b.**

| Atom | Atom | Atom | Angle/°    | Atom | Atom | Atom | Angle/°    |
|------|------|------|------------|------|------|------|------------|
| C9   | N1   | C11  | 120.77(14) | C11  | C12  | C23  | 120.64(15) |
| C8   | N2   | C1   | 108.63(14) | C13  | C12  | C11  | 118.87(15) |
| N2   | C1   | C2   | 128.30(16) | C13  | C12  | C23  | 120.48(15) |
| N2   | C1   | C6   | 108.86(14) | C12  | C13  | C14  | 121.52(16) |
| C2   | C1   | C6   | 122.84(15) | C15  | C14  | C13  | 120.46(17) |
| C3   | C2   | C1   | 117.33(16) | C14  | C15  | C10  | 120.54(16) |
| C2   | C3   | C4   | 121.18(16) | C17  | C16  | C9   | 123.52(15) |
| C5   | C4   | C3   | 121.46(16) | C21  | C16  | C9   | 118.91(15) |
| C4   | C5   | C6   | 118.89(16) | C21  | C16  | C17  | 117.55(15) |
| C1   | C6   | C7   | 106.27(14) | C18  | C17  | C16  | 120.63(16) |
| C5   | C6   | C1   | 118.28(15) | C17  | C18  | C19  | 121.62(16) |
| C5   | C6   | C7   | 135.45(16) | C18  | C19  | C22  | 121.91(16) |
| C8   | C7   | C6   | 106.80(14) | C20  | C19  | C18  | 117.47(16) |
| C8   | C7   | C10  | 118.86(15) | C20  | C19  | C22  | 120.62(16) |
| C10  | C7   | C6   | 134.32(15) | C21  | C20  | C19  | 121.52(16) |
| N2   | C8   | C7   | 109.43(14) | C20  | C21  | C16  | 121.21(16) |
| N2   | C8   | C9   | 128.99(15) | C24  | C23  | C12  | 113.89(14) |
| C7   | C8   | C9   | 121.56(15) | C25  | C24  | C23  | 121.72(16) |
| N1   | C9   | C8   | 119.73(15) | C25  | C24  | C29  | 117.21(16) |
| N1   | C9   | C16  | 116.75(14) | C29  | C24  | C23  | 121.07(16) |
| C8   | C9   | C16  | 123.50(15) | C26  | C25  | C24  | 121.15(17) |
| C7   | C10  | C11  | 116.46(15) | C25  | C26  | C27  | 121.71(17) |
| C15  | C10  | C7   | 124.72(15) | C26  | C27  | C28  | 117.12(17) |
| C15  | C10  | C11  | 118.79(15) | C26  | C27  | C30  | 121.81(18) |
| N1   | C11  | C10  | 122.63(15) | C28  | C27  | C30  | 121.05(18) |
| N1   | C11  | C12  | 117.54(14) | C29  | C28  | C27  | 121.38(17) |
| C12  | C11  | C10  | 119.82(15) | C28  | C29  | C24  | 121.42(17) |

**Table 6 Torsion Angles for 4b.**

| A  | B   | C   | D   | Angle/°     | A   | B   | C   | D   | Angle/°     |
|----|-----|-----|-----|-------------|-----|-----|-----|-----|-------------|
| N1 | C9  | C16 | C17 | -147.34(16) | C9  | N1  | C11 | C12 | 178.62(15)  |
| N1 | C9  | C16 | C21 | 31.0(2)     | C9  | C16 | C17 | C18 | 178.91(16)  |
| N1 | C11 | C12 | C13 | -178.49(15) | C9  | C16 | C21 | C20 | -178.65(16) |
| N1 | C11 | C12 | C23 | 0.2(2)      | C10 | C7  | C8  | N2  | 178.12(14)  |
| N2 | C1  | C2  | C3  | -178.98(17) | C10 | C7  | C8  | C9  | -0.4(2)     |
| N2 | C1  | C6  | C5  | 178.76(14)  | C10 | C11 | C12 | C13 | 0.4(2)      |
| N2 | C1  | C6  | C7  | -0.67(18)   | C10 | C11 | C12 | C23 | 179.05(15)  |
| N2 | C8  | C9  | N1  | -177.63(16) | C11 | N1  | C9  | C8  | -0.2(2)     |
| N2 | C8  | C9  | C16 | 0.5(3)      | C11 | N1  | C9  | C16 | -178.48(14) |
| C1 | N2  | C8  | C7  | -0.07(19)   | C11 | C10 | C15 | C14 | 0.4(3)      |
| C1 | N2  | C8  | C9  | 178.30(17)  | C11 | C12 | C13 | C14 | -0.2(3)     |
| C1 | C2  | C3  | C4  | 0.1(3)      | C11 | C12 | C23 | C24 | 89.4(2)     |
| C1 | C6  | C7  | C8  | 0.62(18)    | C12 | C13 | C14 | C15 | 0.1(3)      |
| C1 | C6  | C7  | C10 | -177.50(18) | C12 | C23 | C24 | C25 | -85.3(2)    |
| C2 | C1  | C6  | C5  | -1.1(3)     | C12 | C23 | C24 | C29 | 94.54(19)   |
| C2 | C1  | C6  | C7  | 179.51(16)  | C13 | C12 | C23 | C24 | -91.92(19)  |
| C2 | C3  | C4  | C5  | -0.8(3)     | C13 | C14 | C15 | C10 | -0.2(3)     |
| C3 | C4  | C5  | C6  | 0.5(3)      | C15 | C10 | C11 | N1  | 178.34(15)  |
| C4 | C5  | C6  | C1  | 0.4(2)      | C15 | C10 | C11 | C12 | -0.5(2)     |
| C4 | C5  | C6  | C7  | 179.59(18)  | C16 | C17 | C18 | C19 | -0.3(3)     |
| C5 | C6  | C7  | C8  | -178.66(18) | C17 | C16 | C21 | C20 | -0.2(3)     |
| C5 | C6  | C7  | C10 | 3.2(3)      | C17 | C18 | C19 | C20 | -0.2(3)     |
| C6 | C1  | C2  | C3  | 0.8(3)      | C17 | C18 | C19 | C22 | -179.57(17) |
| C6 | C7  | C8  | N2  | -0.35(18)   | C18 | C19 | C20 | C21 | 0.6(3)      |
| C6 | C7  | C8  | C9  | -178.86(15) | C19 | C20 | C21 | C16 | -0.4(3)     |
| C6 | C7  | C10 | C11 | 177.89(17)  | C21 | C16 | C17 | C18 | 0.5(2)      |
| C6 | C7  | C10 | C15 | 0.1(3)      | C22 | C19 | C20 | C21 | 179.92(17)  |
| C7 | C8  | C9  | N1  | 0.6(2)      | C23 | C12 | C13 | C14 | -178.84(16) |
| C7 | C8  | C9  | C16 | 178.68(15)  | C23 | C24 | C25 | C26 | 179.02(15)  |
| C7 | C10 | C11 | N1  | 0.4(2)      | C23 | C24 | C29 | C28 | -179.53(15) |
| C7 | C10 | C11 | C12 | -178.44(15) | C24 | C25 | C26 | C27 | 0.1(3)      |
| C7 | C10 | C15 | C14 | 178.15(16)  | C25 | C24 | C29 | C28 | 0.3(2)      |
| C8 | N2  | C1  | C2  | -179.72(17) | C25 | C26 | C27 | C28 | 1.2(3)      |
| C8 | N2  | C1  | C6  | 0.47(19)    | C25 | C26 | C27 | C30 | -177.32(17) |
| C8 | C7  | C10 | C11 | -0.1(2)     | C26 | C27 | C28 | C29 | -1.7(3)     |
| C8 | C7  | C10 | C15 | -177.89(15) | C27 | C28 | C29 | C24 | 1.0(3)      |
| C8 | C9  | C16 | C17 | 34.5(3)     | C29 | C24 | C25 | C26 | -0.8(2)     |

C8 C9 C16 C21      -147.14(17) C30 C27 C28 C29      176.82(16)  
 C9 N1 C11 C10      -0.2(2)

**Table 7 Hydrogen Atom Coordinates ( $\text{\AA}\times 10^4$ ) and Isotropic Displacement Parameters ( $\text{\AA}^2\times 10^3$ ) for 4b.**

| Atom | x        | y        | z        | U(eq) |
|------|----------|----------|----------|-------|
| H2   | 4514(12) | 6136(17) | 1384(16) | 30(5) |
| H2A  | 6162.45  | 6200.36  | 931.1    | 32    |
| H3   | 7507.29  | 5469.77  | 1548.06  | 34    |
| H4   | 7698.4   | 4165.13  | 3030.52  | 34    |
| H5   | 6565.52  | 3580.34  | 3970.43  | 30    |
| H13  | 3494.53  | 2232.22  | 6557.41  | 32    |
| H14  | 4951.63  | 2058.35  | 6440.29  | 34    |
| H15  | 5570.77  | 2985.94  | 5028.56  | 30    |
| H17  | 3259.9   | 5723.97  | 520.93   | 29    |
| H18  | 2255.34  | 6834.15  | -550.95  | 30    |
| H20  | 1007.17  | 7260.96  | 2192.71  | 31    |
| H21  | 2007.6   | 6174.11  | 3276.32  | 30    |
| H22A | 1029.89  | 8680.39  | 43.48    | 54    |
| H22B | 315.83   | 7819.02  | 304.18   | 54    |
| H22C | 793.49   | 7649.15  | -785.39  | 54    |
| H23A | 2184.84  | 3314.08  | 6120.85  | 32    |
| H23B | 2083.68  | 4143.86  | 5065.01  | 32    |
| H25  | 1559.37  | 3361.67  | 3112.33  | 33    |
| H26  | 735.85   | 2023.64  | 2072.65  | 37    |
| H28  | 820.43   | 48.08    | 4860.3   | 36    |
| H29  | 1661.6   | 1370.8   | 5898.13  | 33    |
| H30A | 565.55   | -612.82  | 2430.34  | 70    |
| H30B | -114.34  | 304.03   | 1965.14  | 70    |
| H30C | -220.39  | -363.63  | 3099.97  | 70    |



## 6. $^1\text{H}$ and $^{13}\text{C}$ NMR spectra of all products

$^1\text{H}$  NMR of **3a** (400 MHz,  $\text{CDCl}_3$ ):

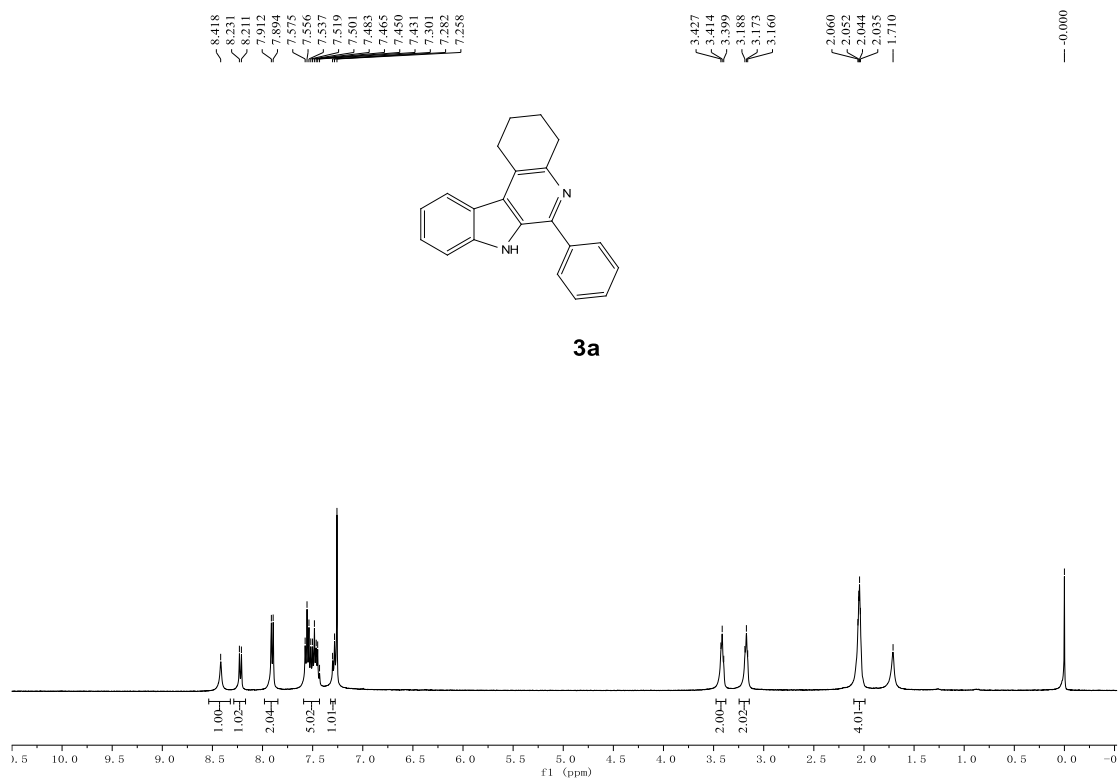

$^{13}\text{C}$  NMR of **3a** (400 MHz,  $\text{CDCl}_3$ ):

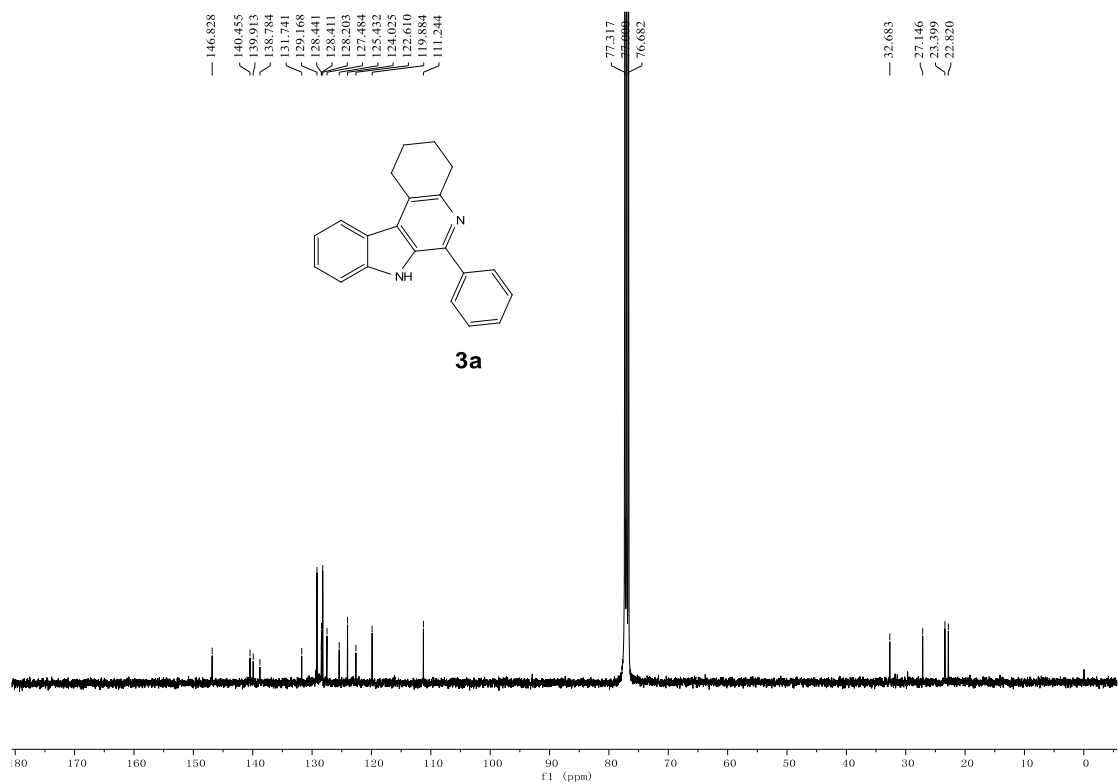

$^1\text{H}$  NMR of **3b** (400 MHz,  $\text{CDCl}_3$ ):

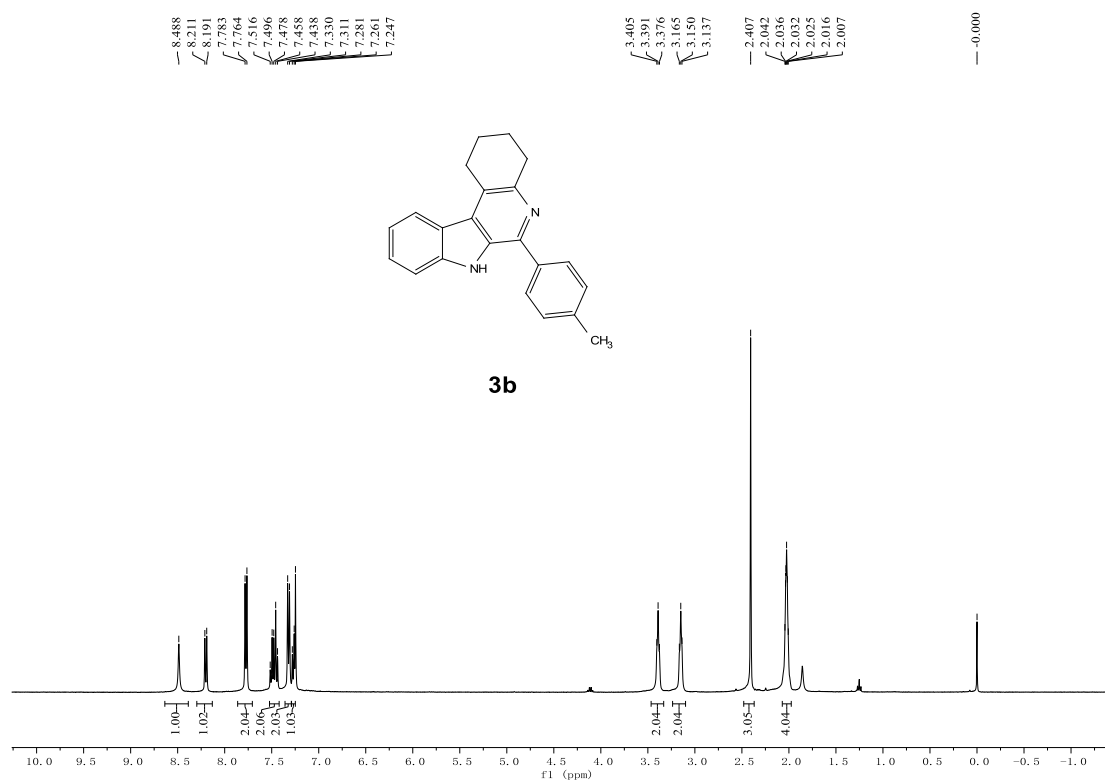

$^{13}\text{C}$  NMR of **3b** (400 MHz,  $\text{CDCl}_3$ ):

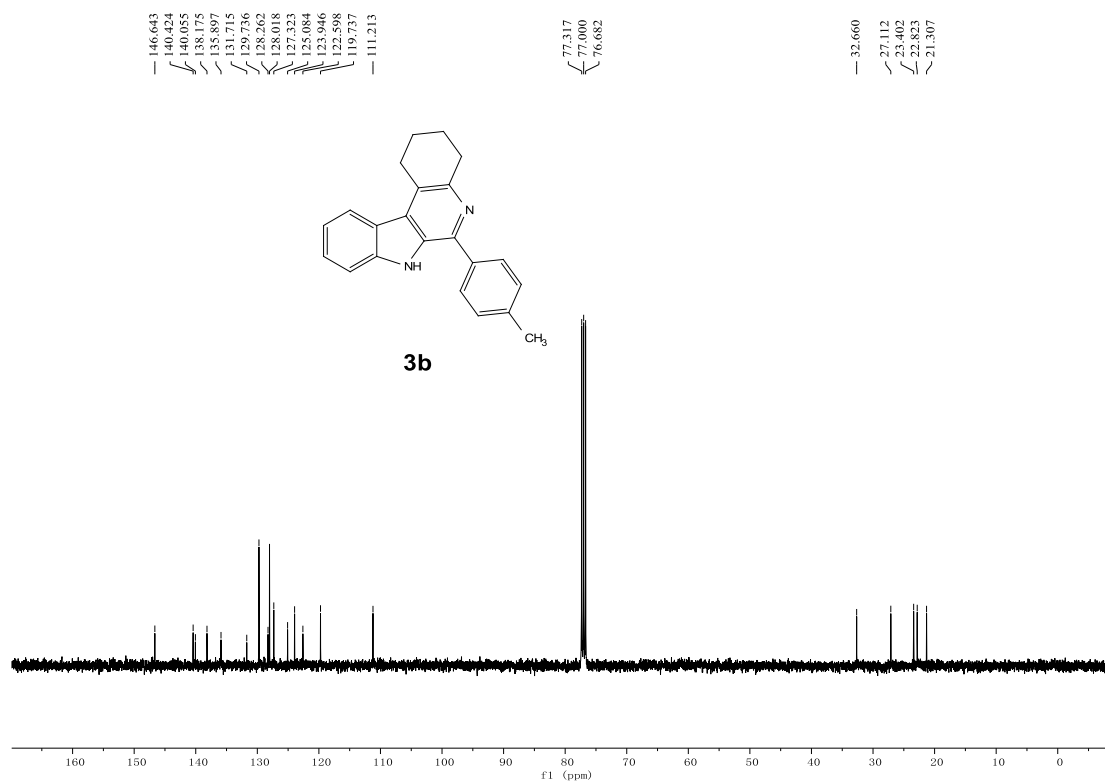

<sup>1</sup>H NMR of **3c** (400 MHz, CDCl<sub>3</sub>):

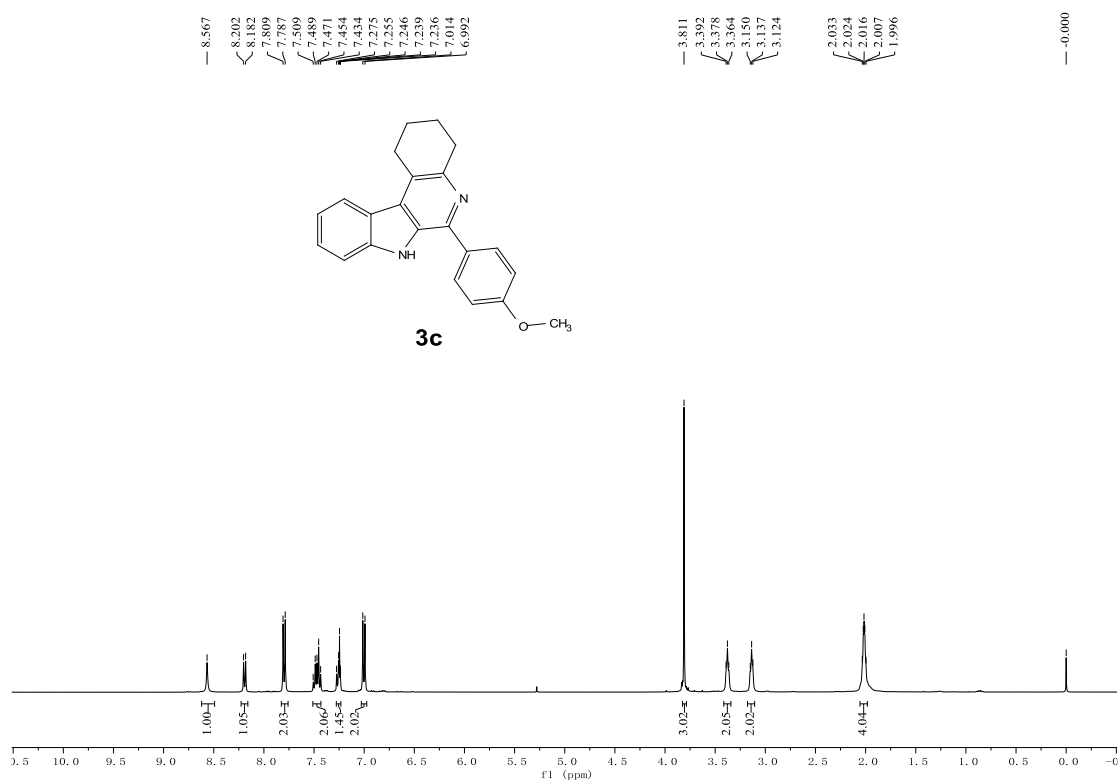

<sup>13</sup>C NMR of **3c** (400 MHz, CDCl<sub>3</sub>):

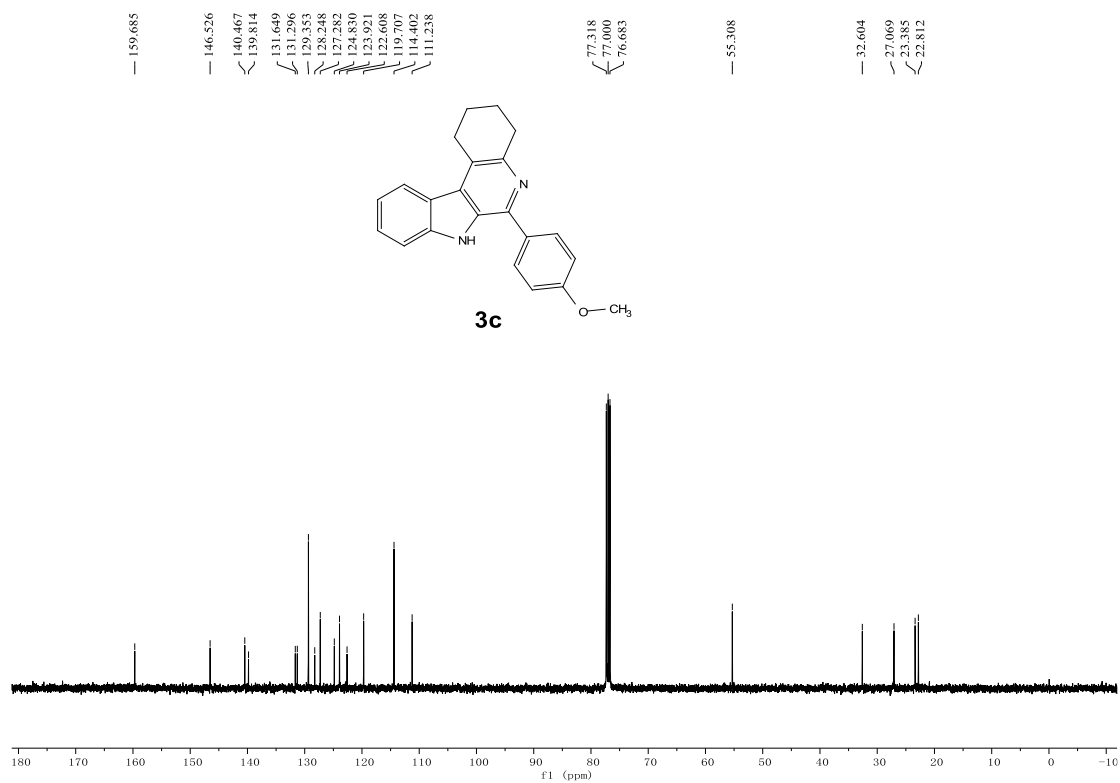

<sup>1</sup>H NMR of **3d** (400 MHz, CDCl<sub>3</sub>):

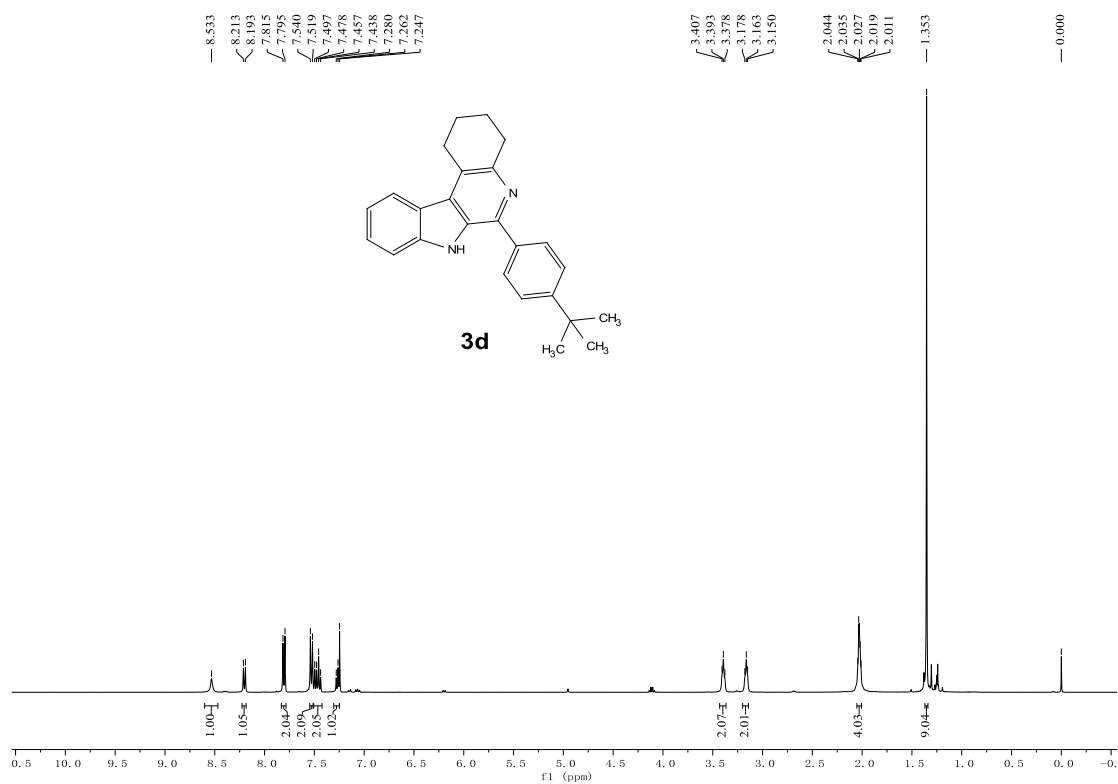

<sup>13</sup>C NMR of **3d** (400 MHz, CDCl<sub>3</sub>):

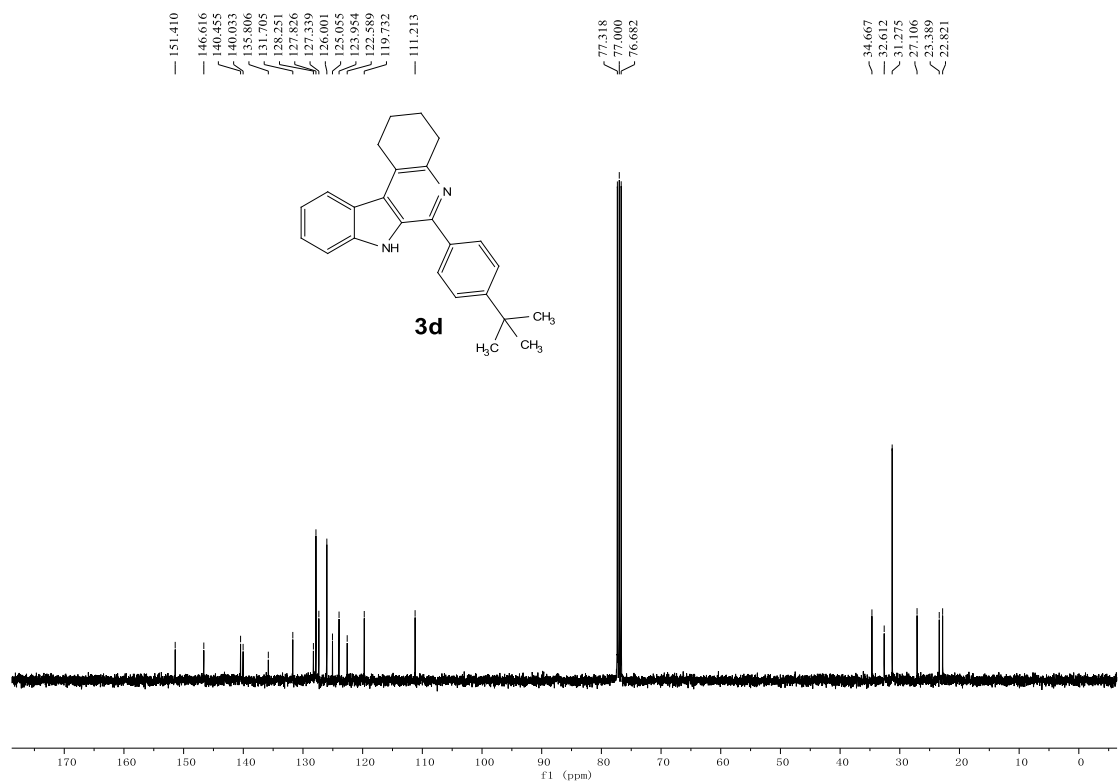

$^1\text{H}$  NMR of **3e** (400 MHz,  $\text{CDCl}_3$ ):

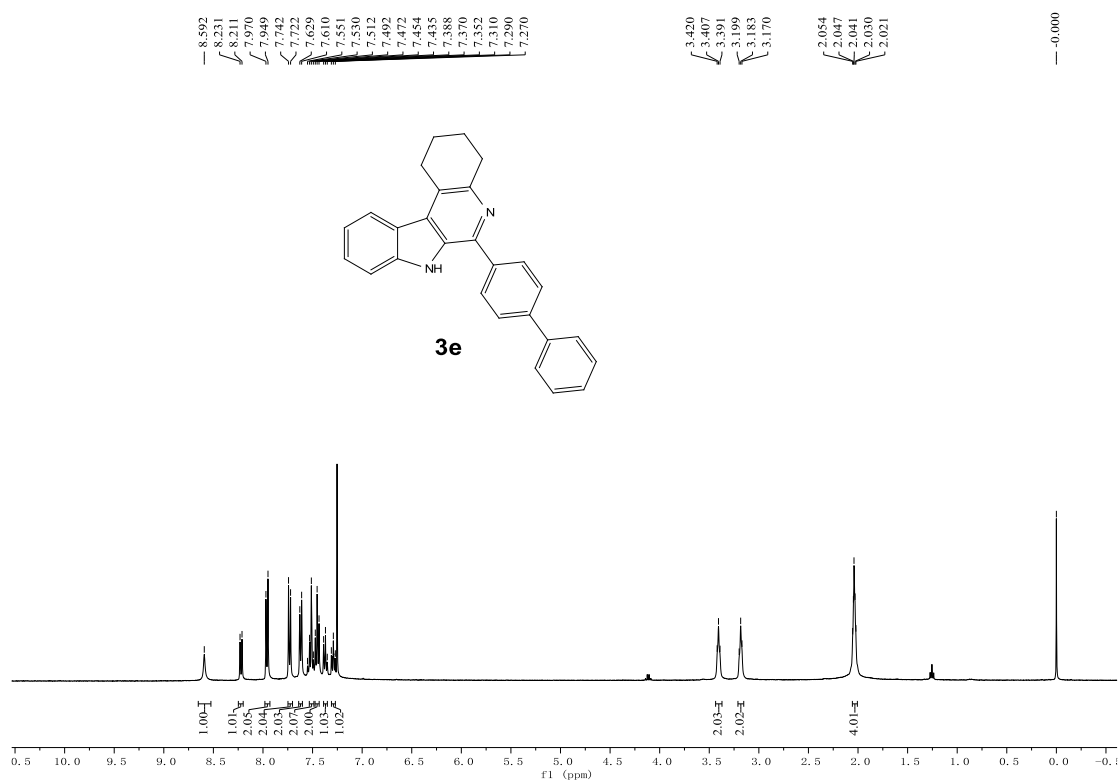

$^{13}\text{C}$  NMR of **3e** (400 MHz,  $\text{DMSO}-d_6$ ):

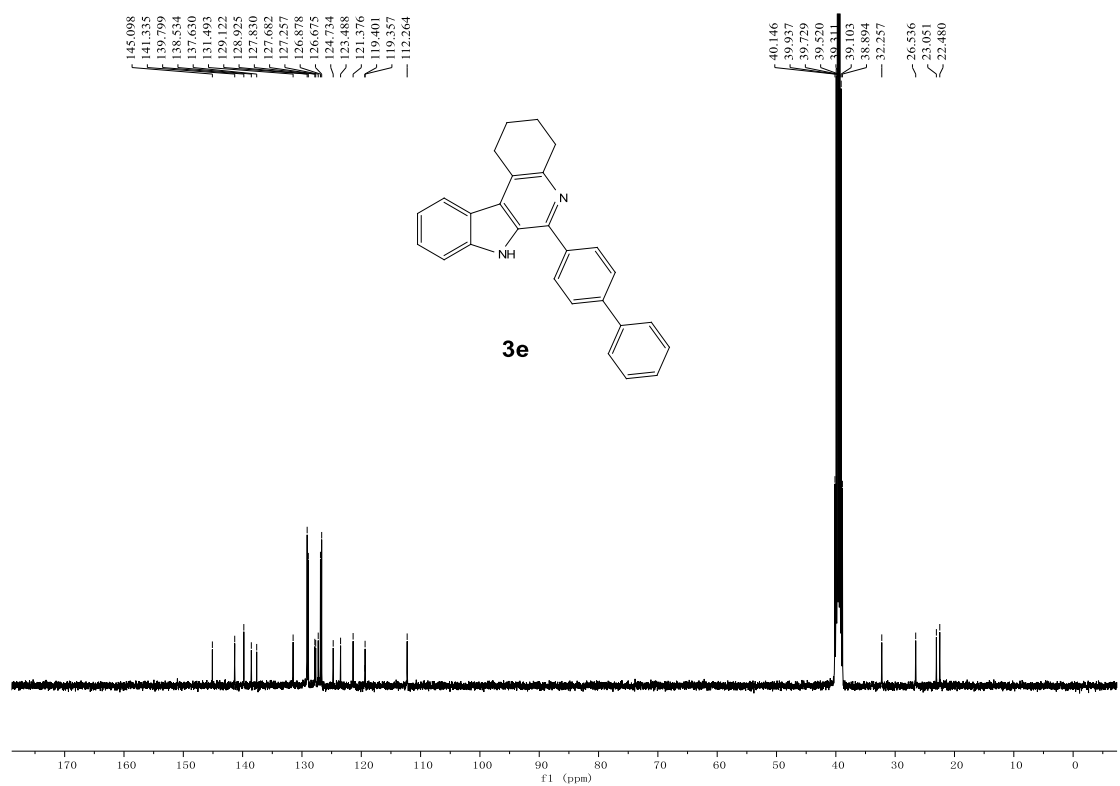

$^1\text{H}$  NMR of **3f** (400 MHz,  $\text{CDCl}_3$ ):

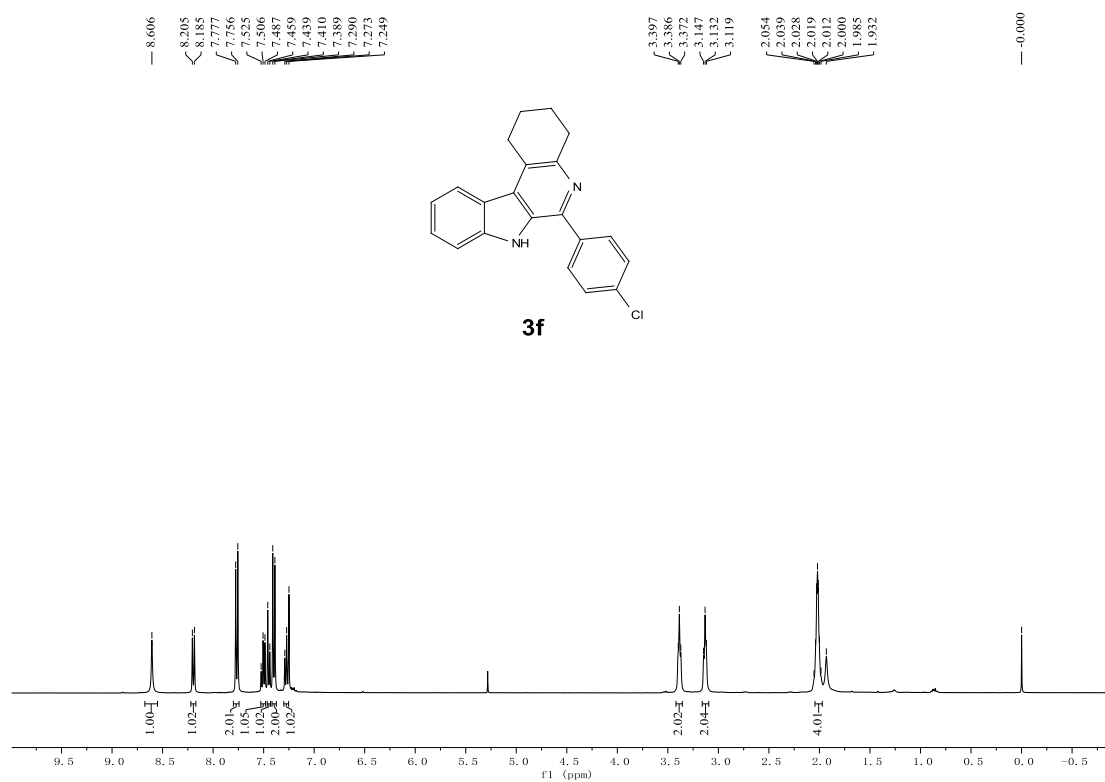

$^{13}\text{C}$  NMR of **3f** (400 MHz,  $\text{CDCl}_3$ ):

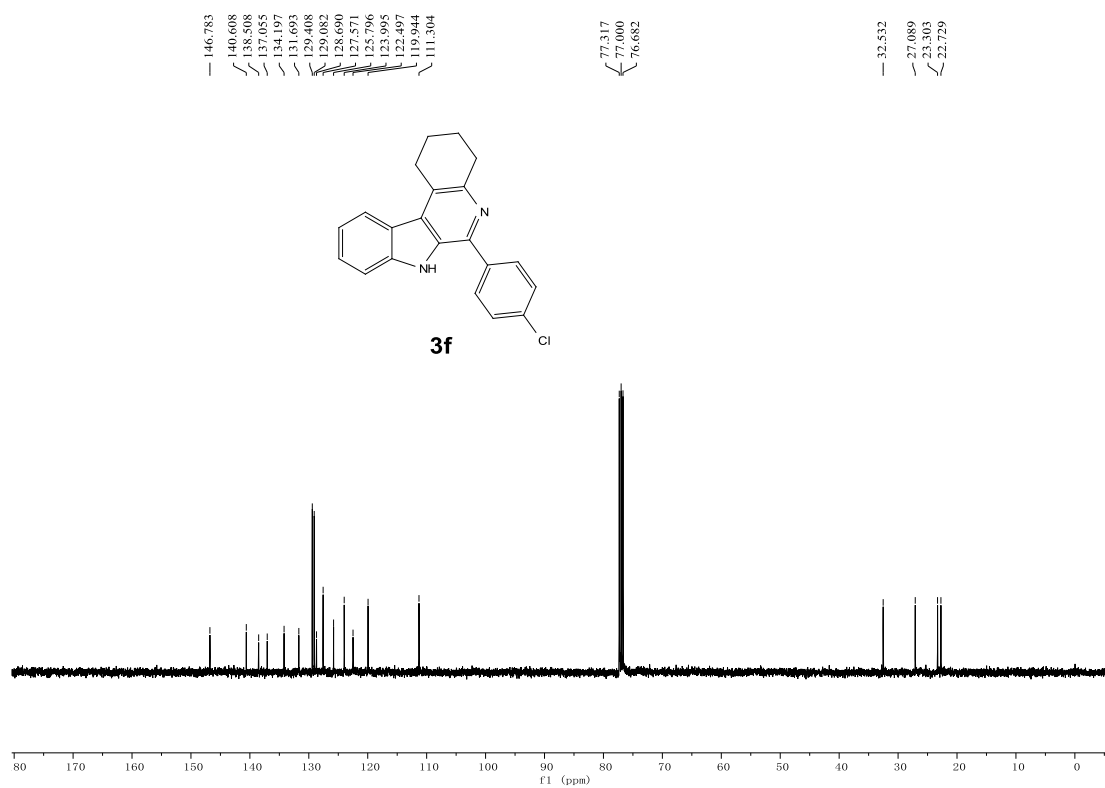

$^1\text{H}$  NMR of **3g** (400 MHz,  $\text{CDCl}_3$ ):

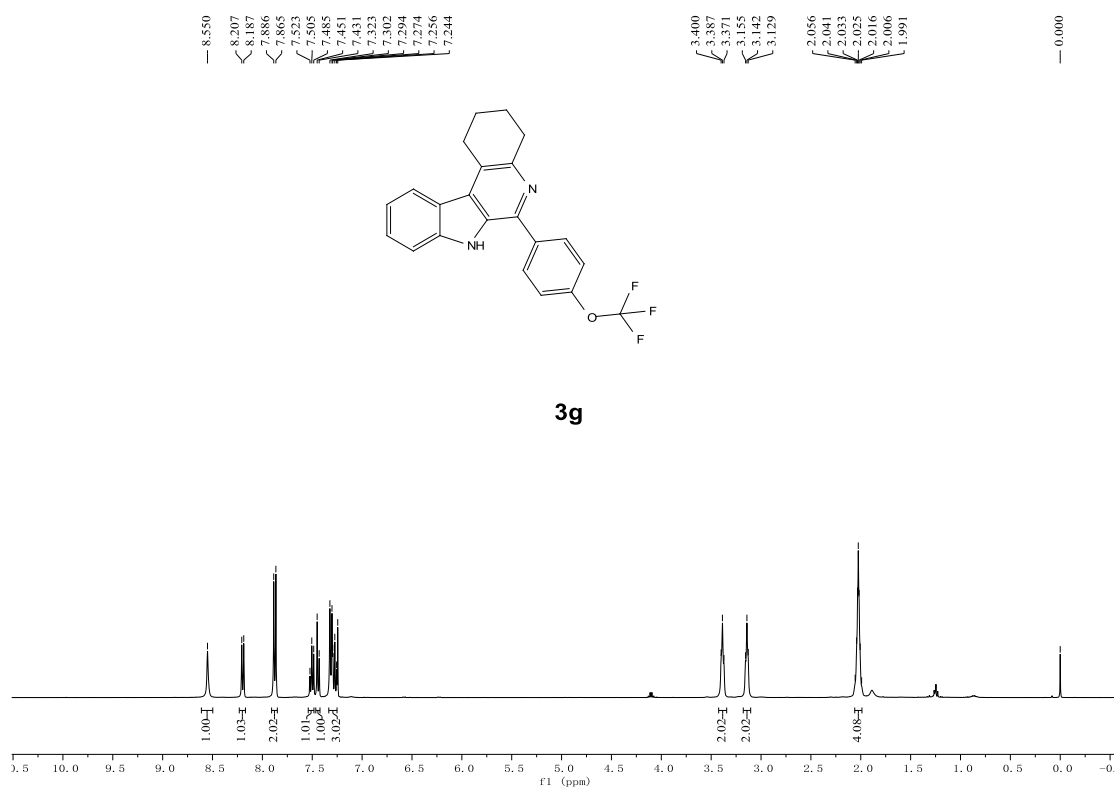

$^{13}\text{C}$  NMR of **3g** (400 MHz,  $\text{CDCl}_3$ ):

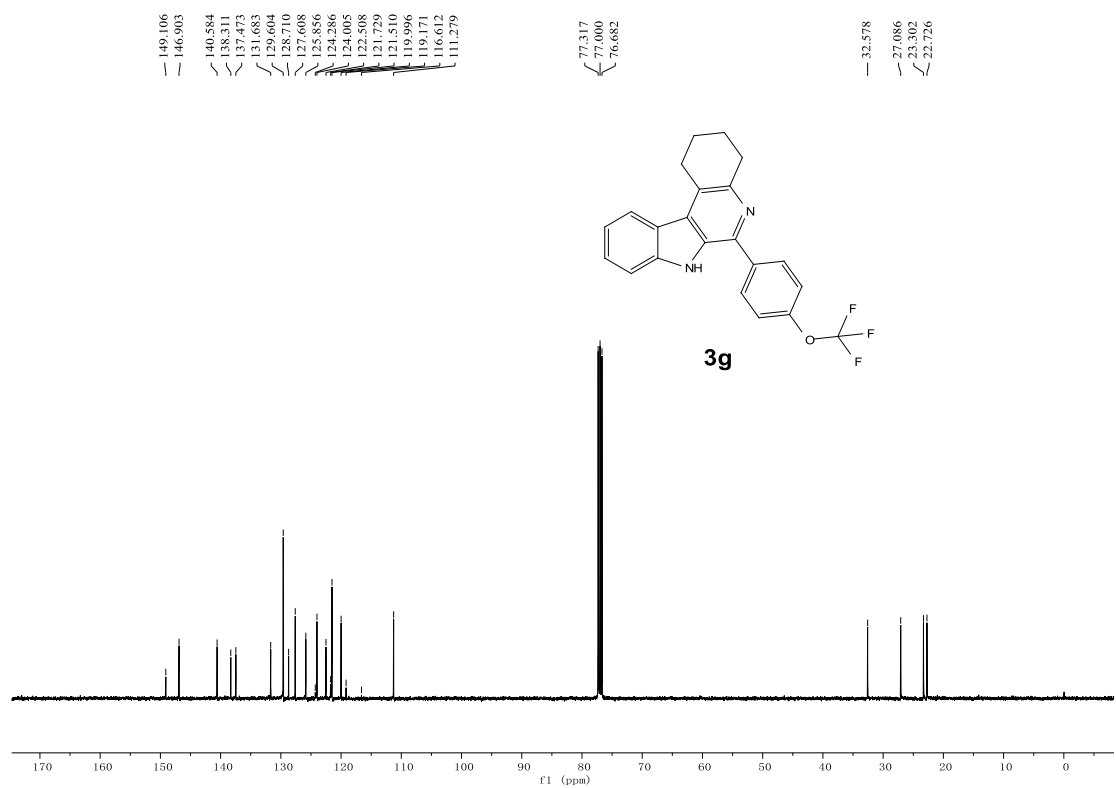

$^{19}\text{F}$  NMR of **3g** (471 MHz,  $\text{CDCl}_3$ ):

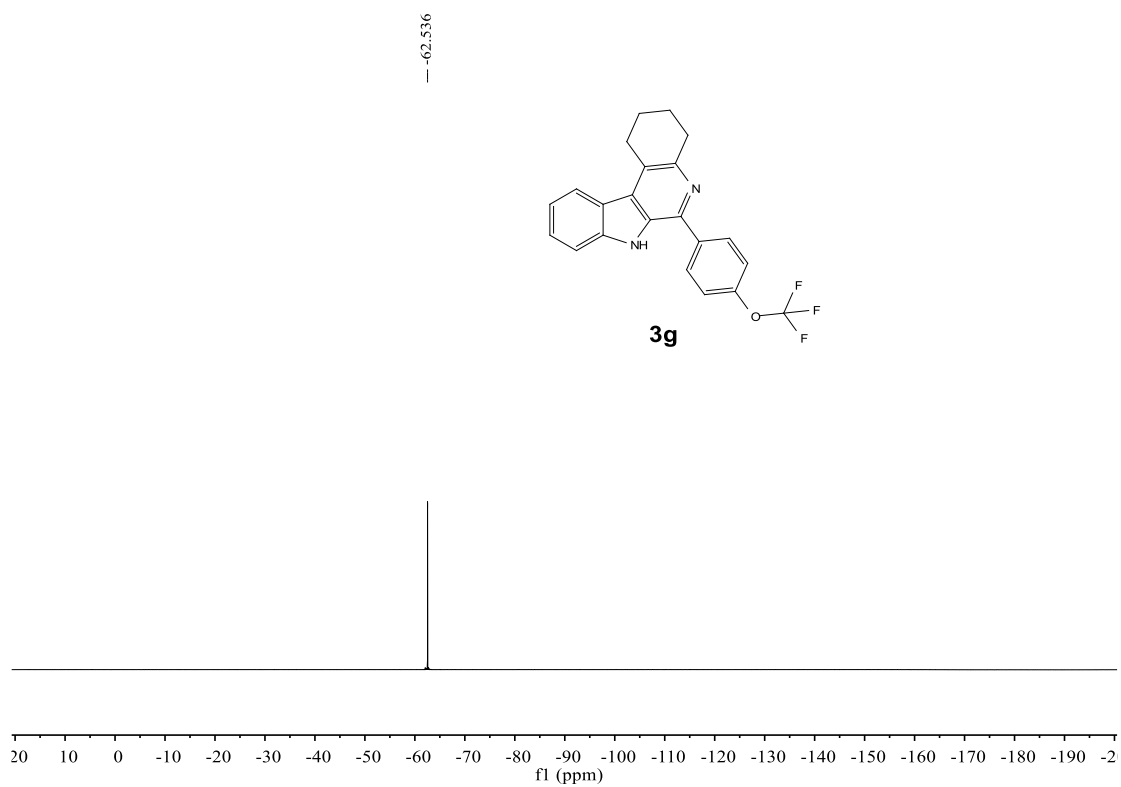

$^1\text{H}$  NMR of **3h** (400 MHz,  $\text{CDCl}_3$ ):

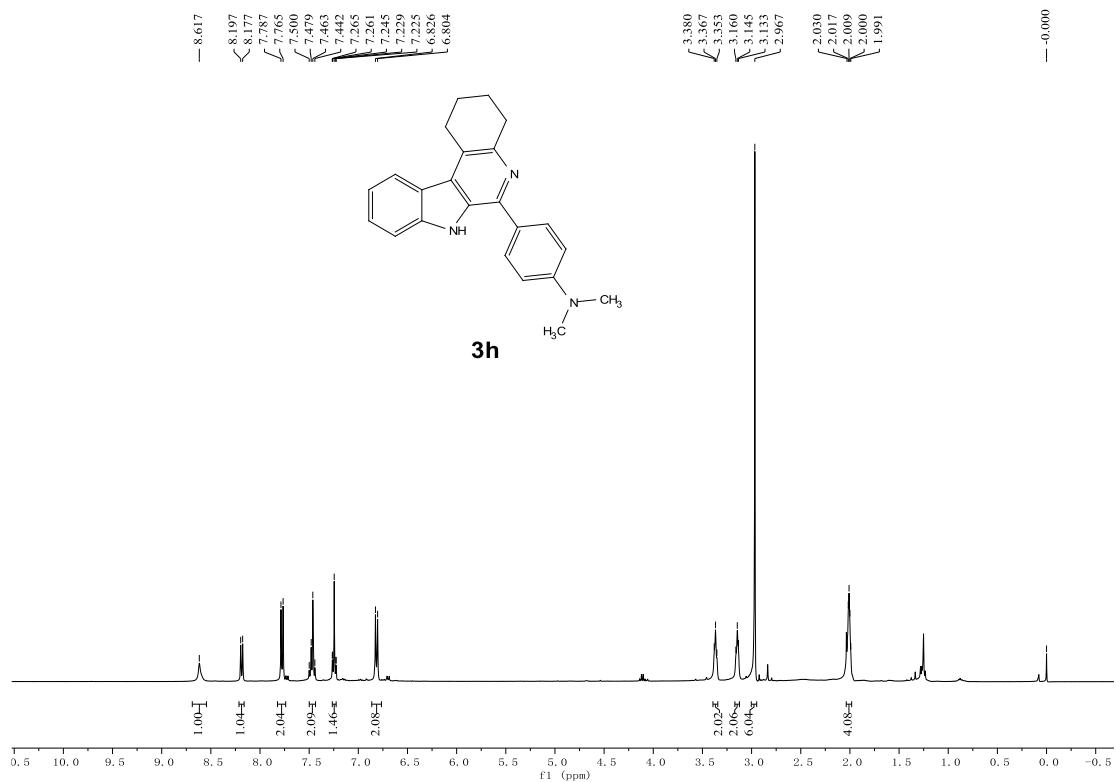



<sup>13</sup>C NMR of **3h** (400 MHz, CDCl<sub>3</sub>):

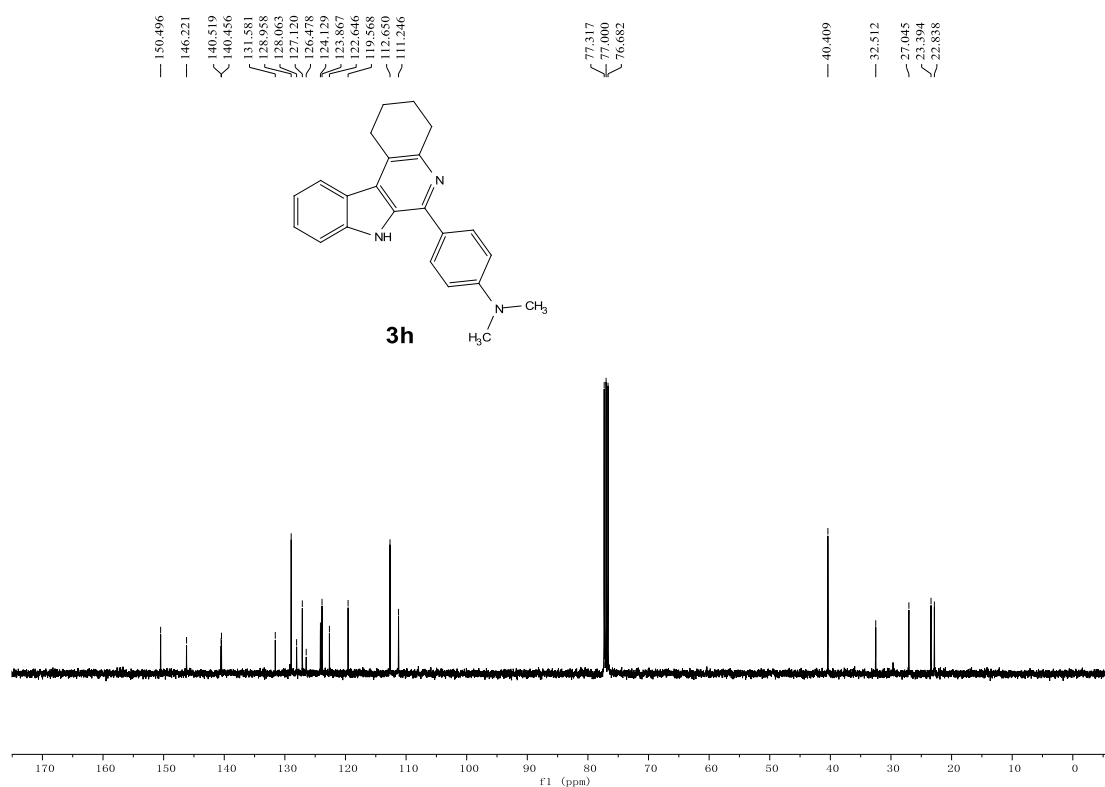

<sup>1</sup>H NMR of **3i** (400 MHz, CDCl<sub>3</sub>):

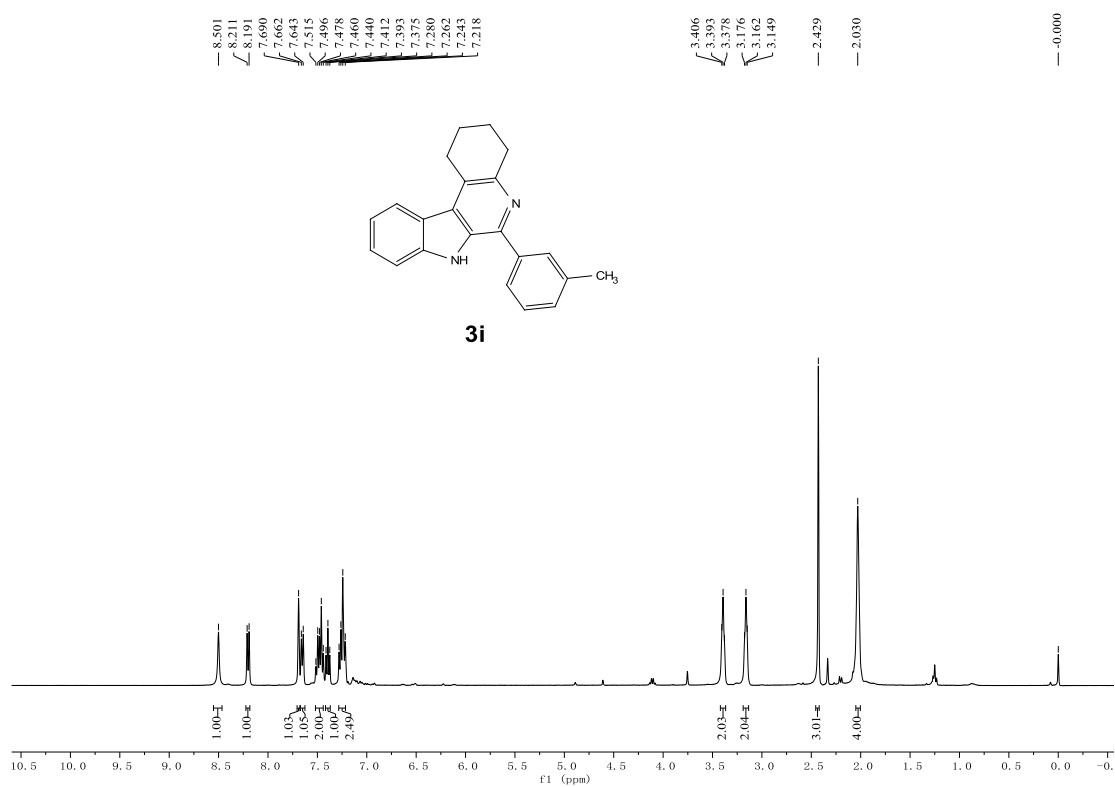

$^{13}\text{C}$  NMR of **3i** (400 MHz,  $\text{CDCl}_3$ ):

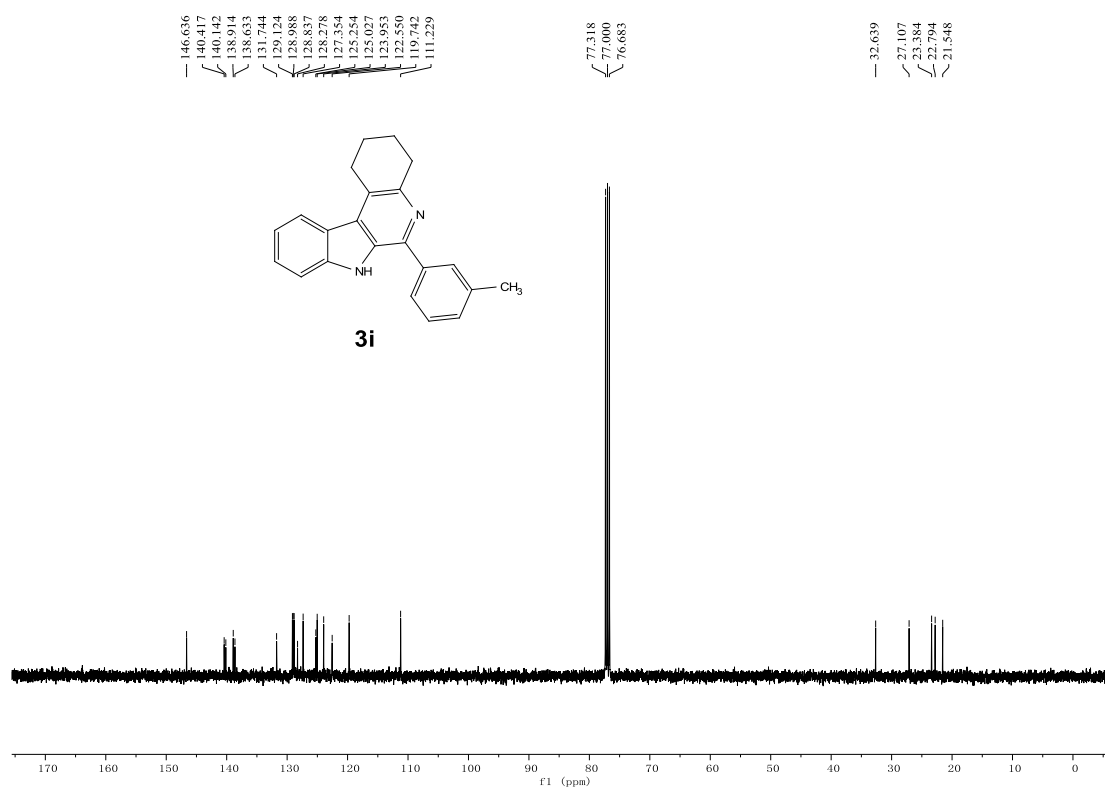

$^1\text{H}$  NMR of **3j** (400 MHz,  $\text{CDCl}_3$ ):

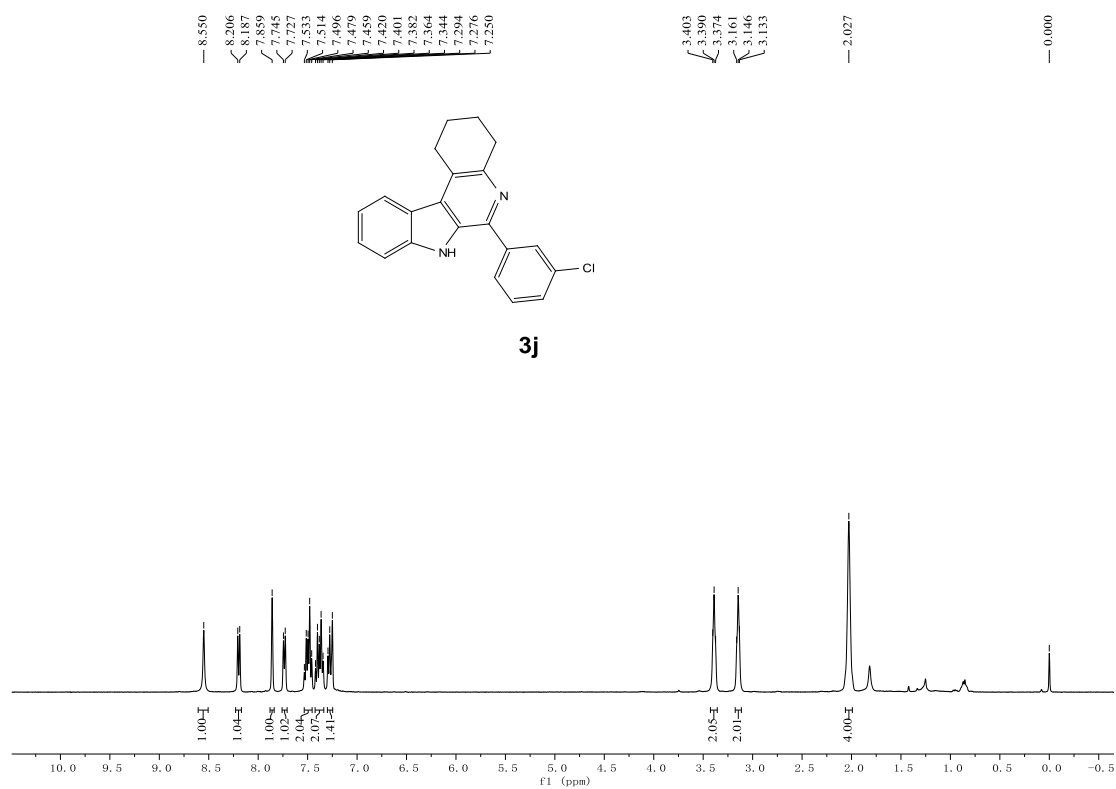

$^{13}\text{C}$  NMR of **3j** (400 MHz,  $\text{CDCl}_3$ ):

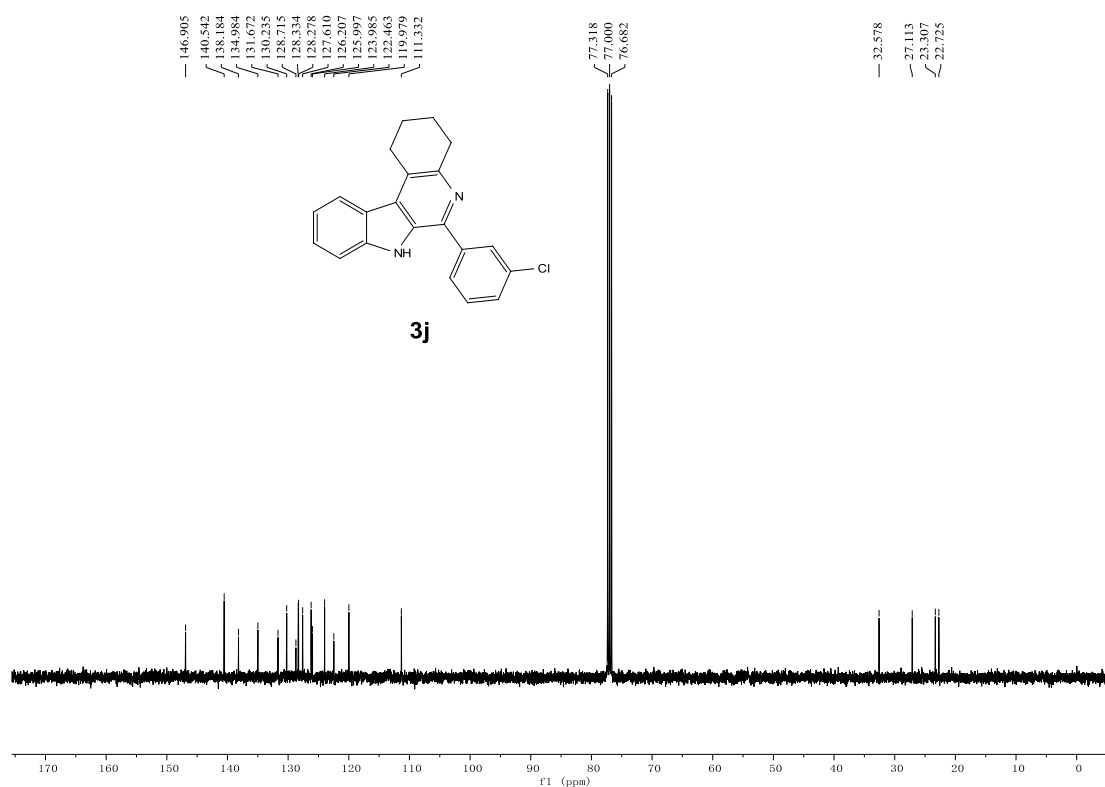

$^1\text{H}$  NMR of **3k** (400 MHz,  $\text{CDCl}_3$ ):

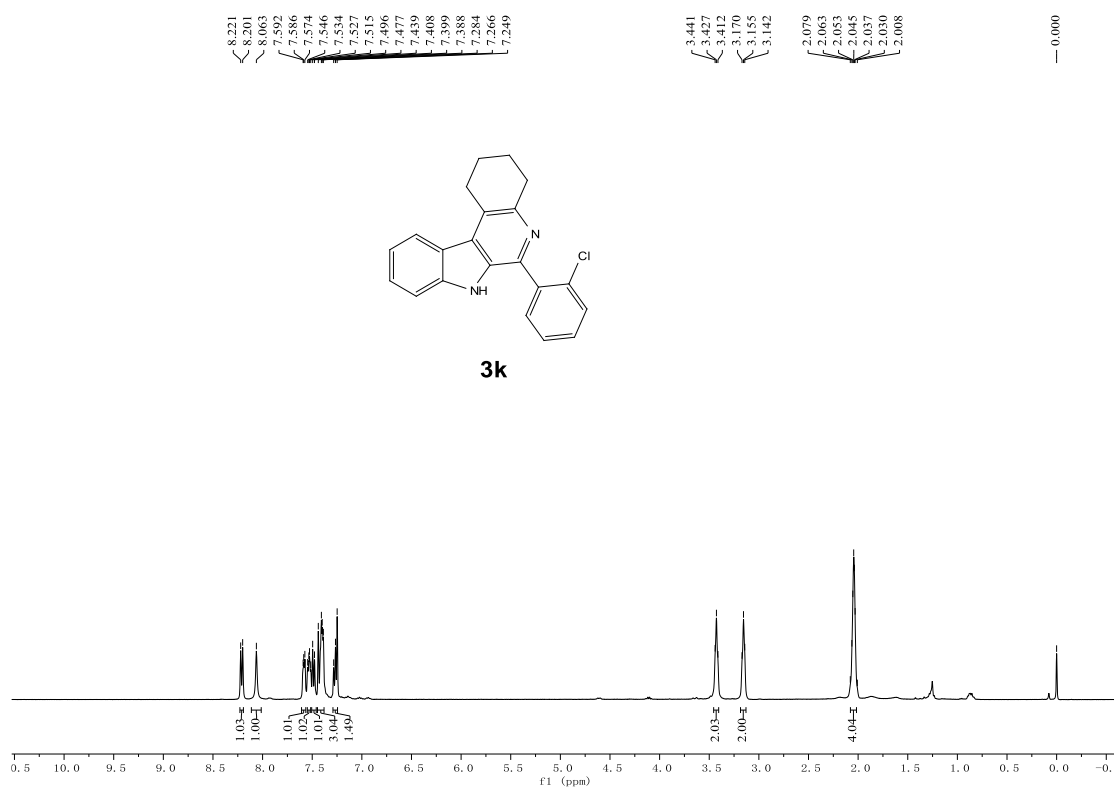

$^{13}\text{C}$  NMR of **3k** (400 MHz,  $\text{CDCl}_3$ ):

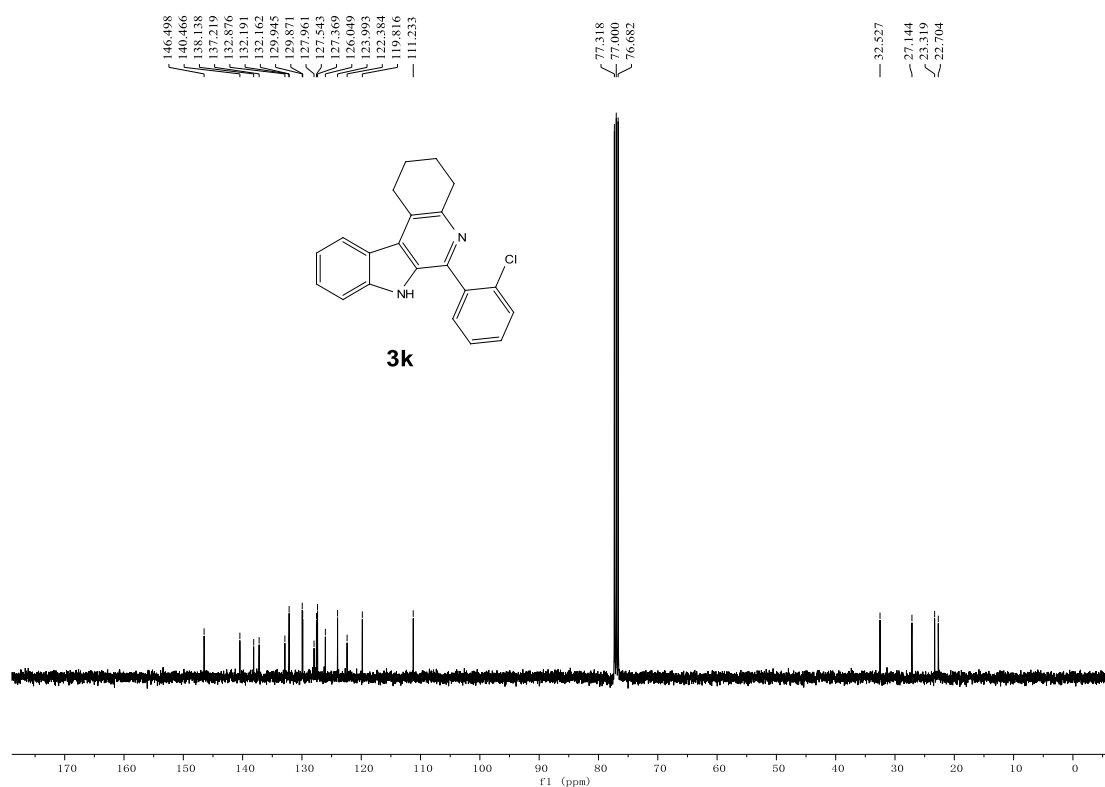

$^1\text{H}$  NMR of **3l** (400 MHz,  $\text{DMSO}-d_6$ ):

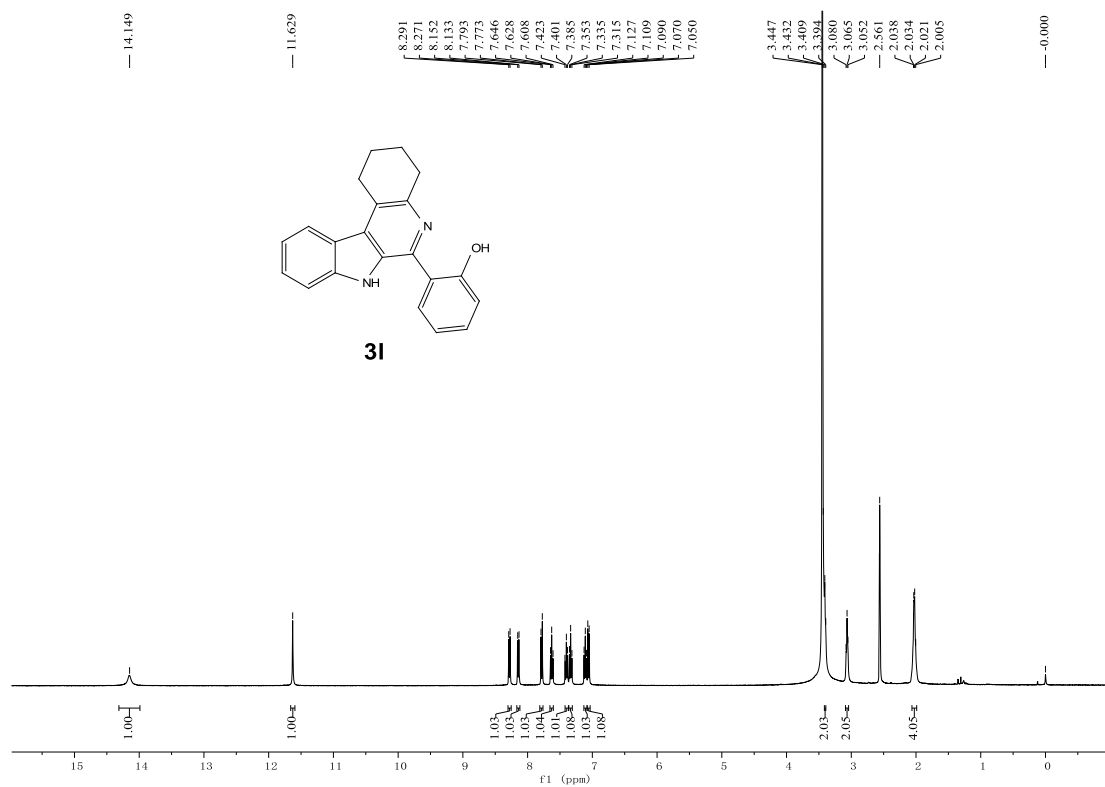

$^{13}\text{C}$  NMR of **3l** (400 MHz,  $\text{CDCl}_3$ ):

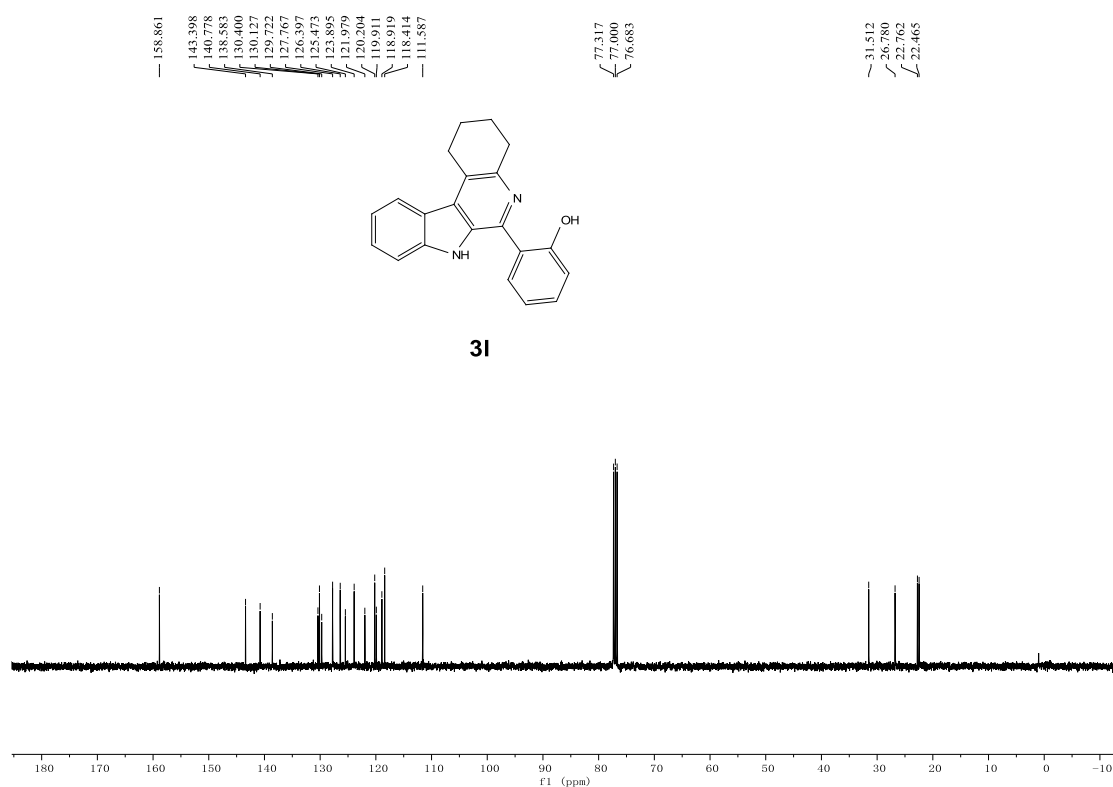

$^1\text{H}$  NMR of **3m** (400 MHz,  $\text{CDCl}_3$ ):

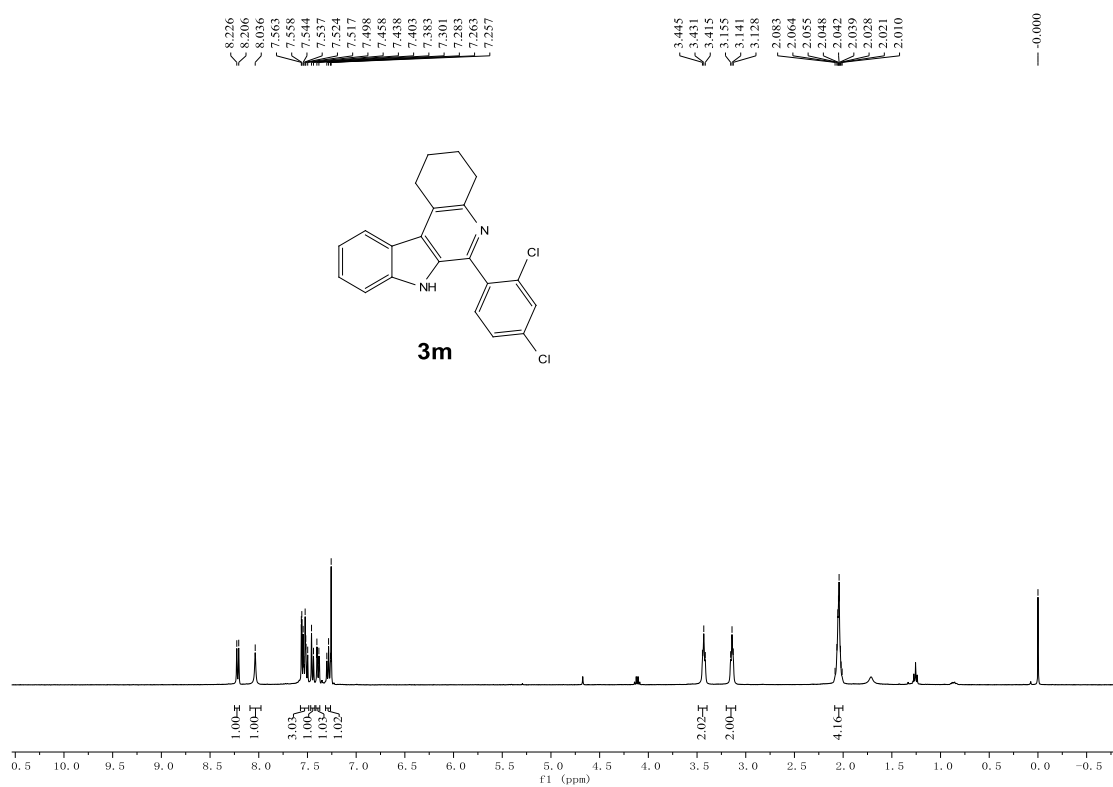

$^{13}\text{C}$  NMR of **3m** (400 MHz,  $\text{CDCl}_3$ ):

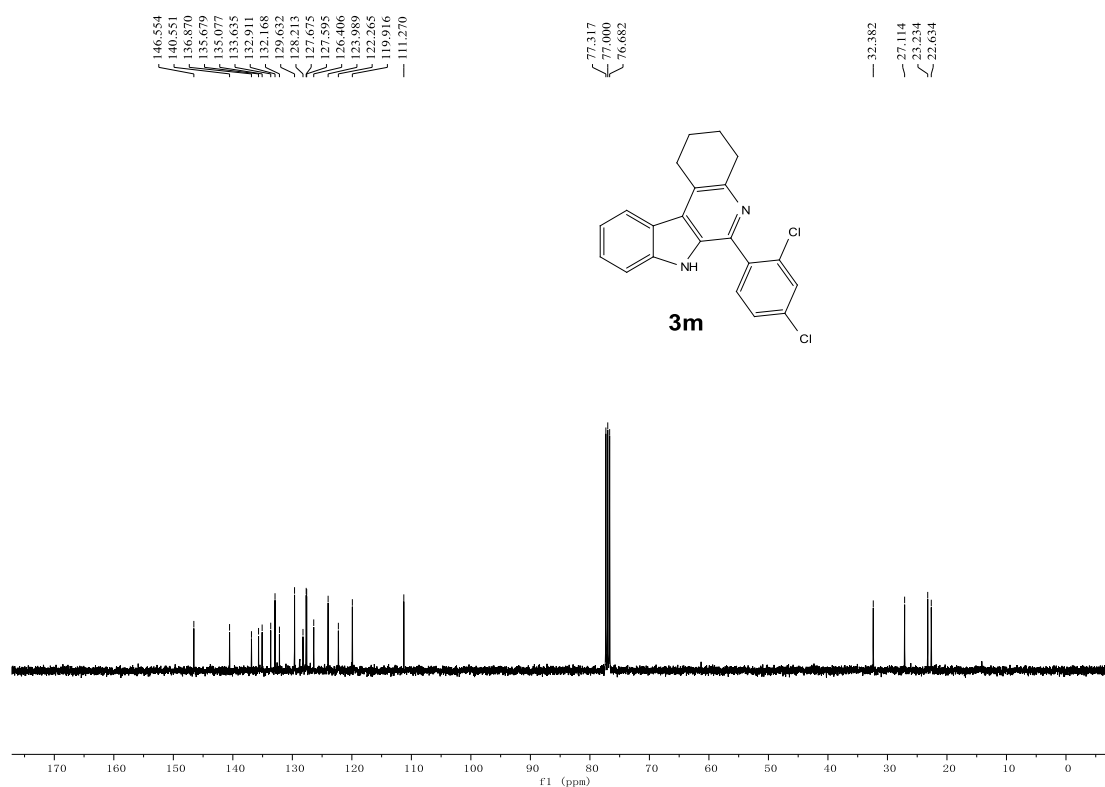

$^1\text{H}$  NMR of **3n** (400 MHz,  $\text{CDCl}_3$ ):

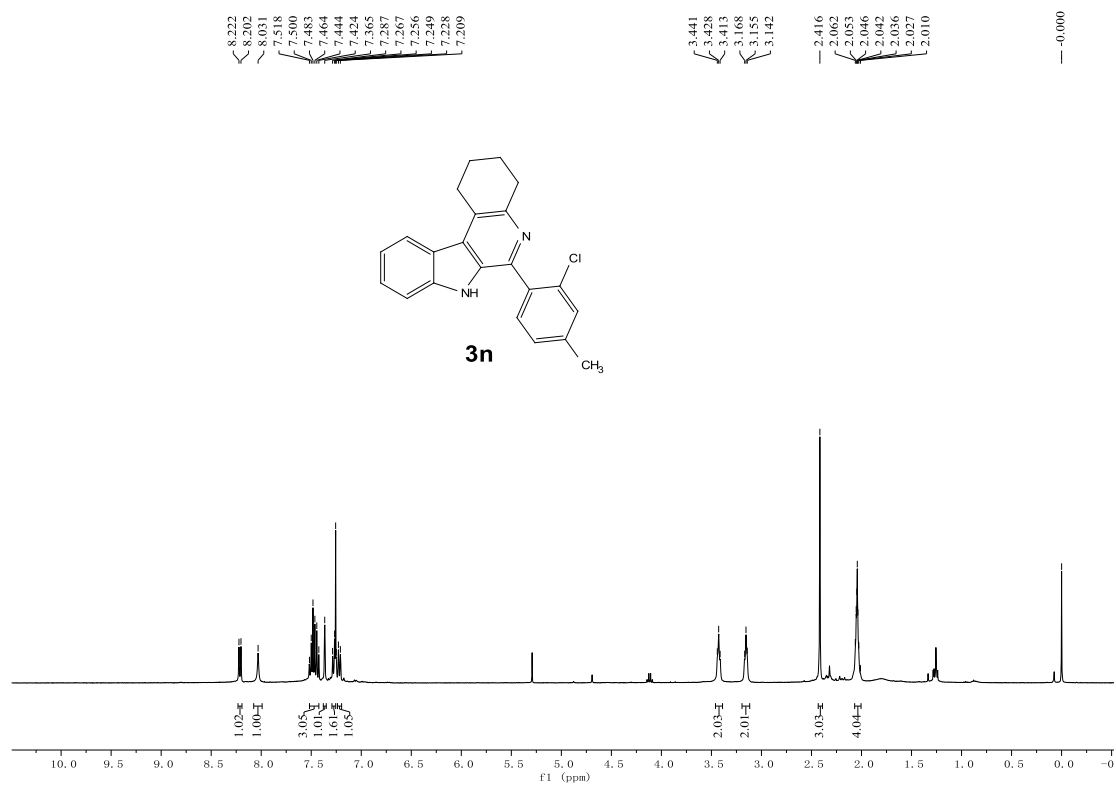

$^{13}\text{C}$  NMR of **3n** (400 MHz,  $\text{CDCl}_3$ ):

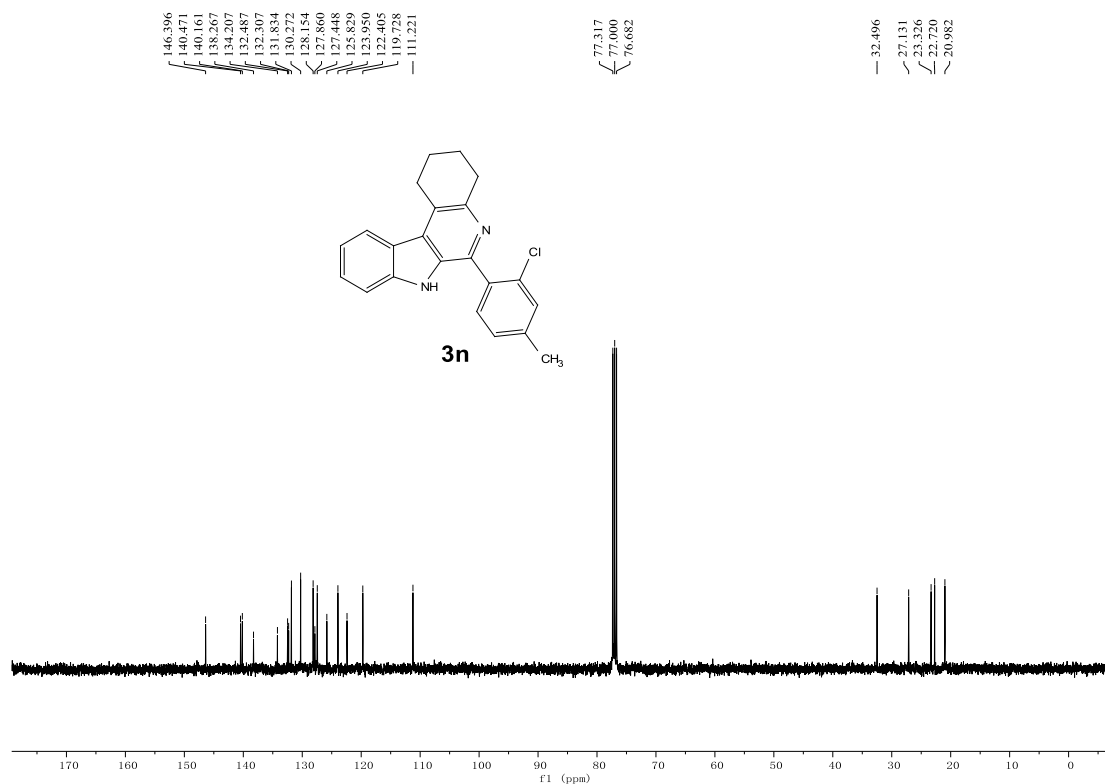

$^1\text{H}$  NMR of **3o** (400 MHz,  $\text{DMSO}-d_6$ ):

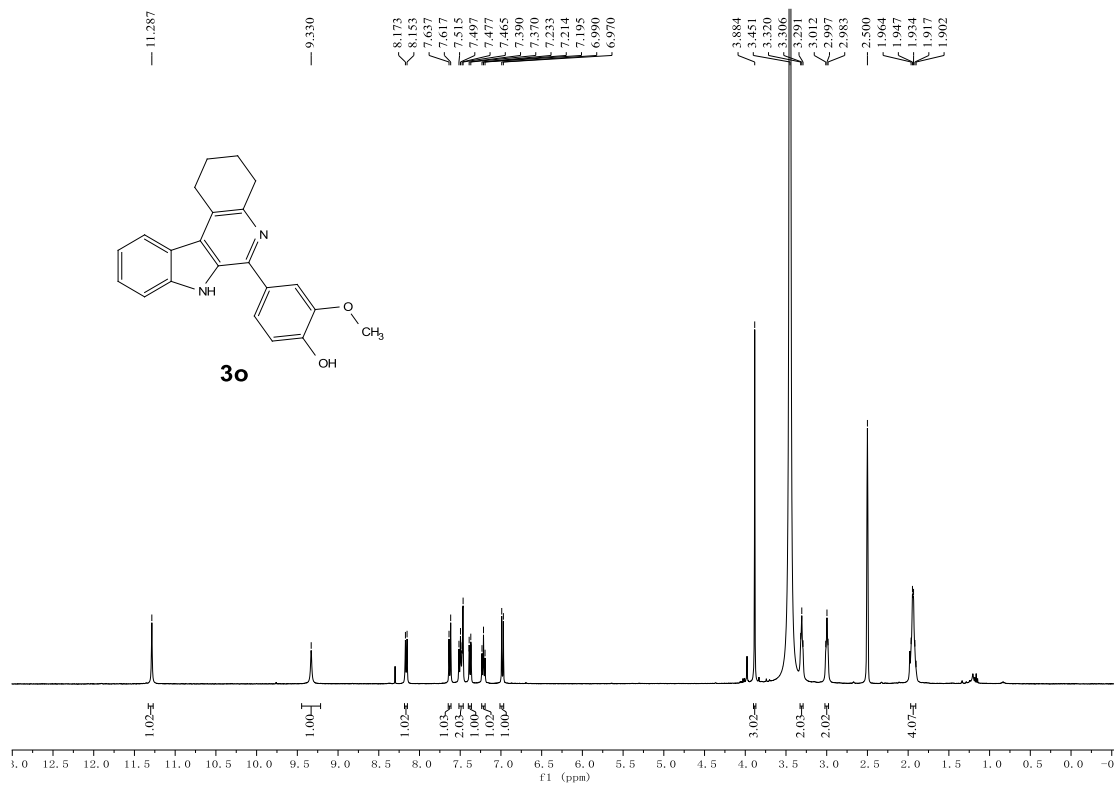

$^{13}\text{C}$  NMR of **3o** (400 MHz,  $\text{DMSO-}d_6$ ):

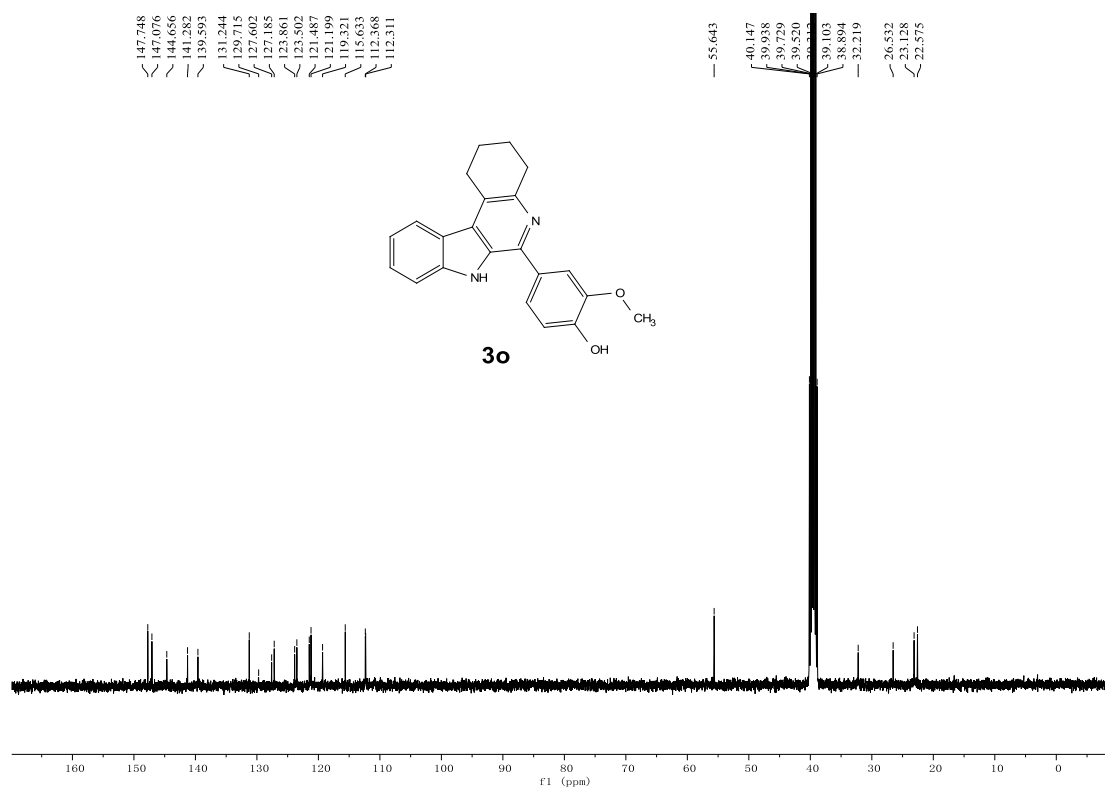

$^1\text{H}$  NMR of **3p** (500 MHz,  $\text{CDCl}_3$ ):

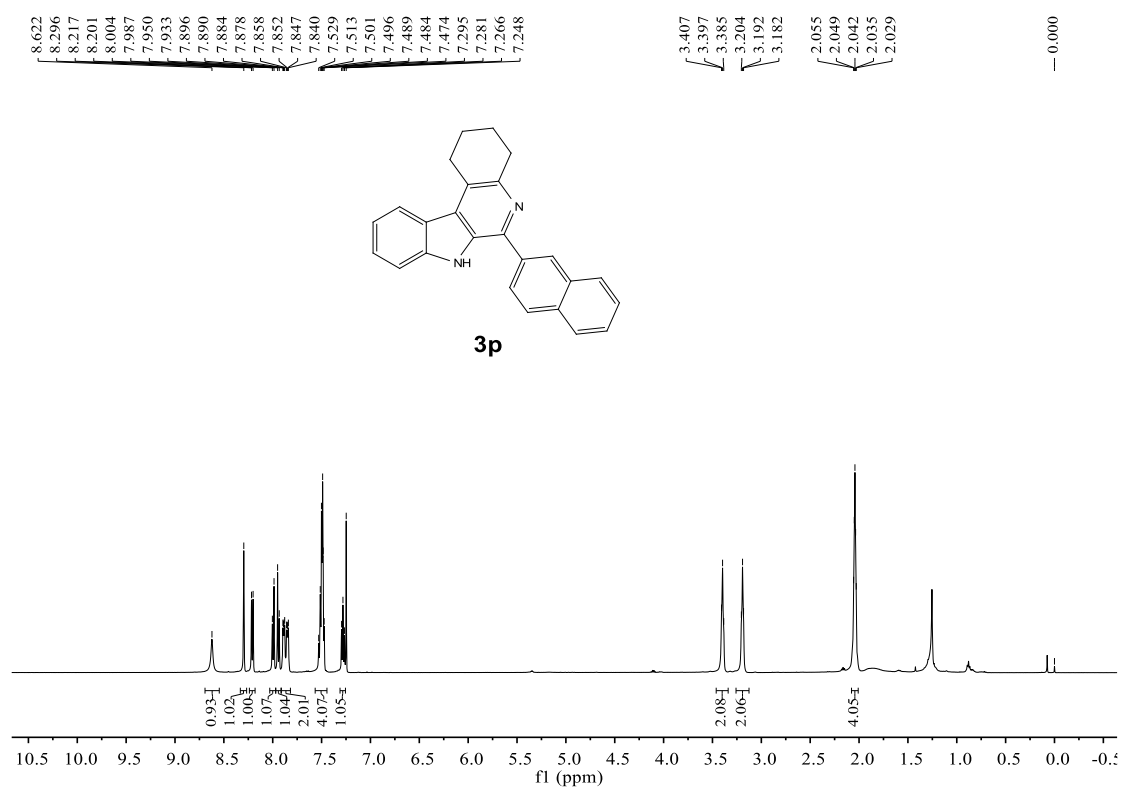



$^{13}\text{C}$  NMR of **3p** (400 MHz,  $\text{CDCl}_3$ ):

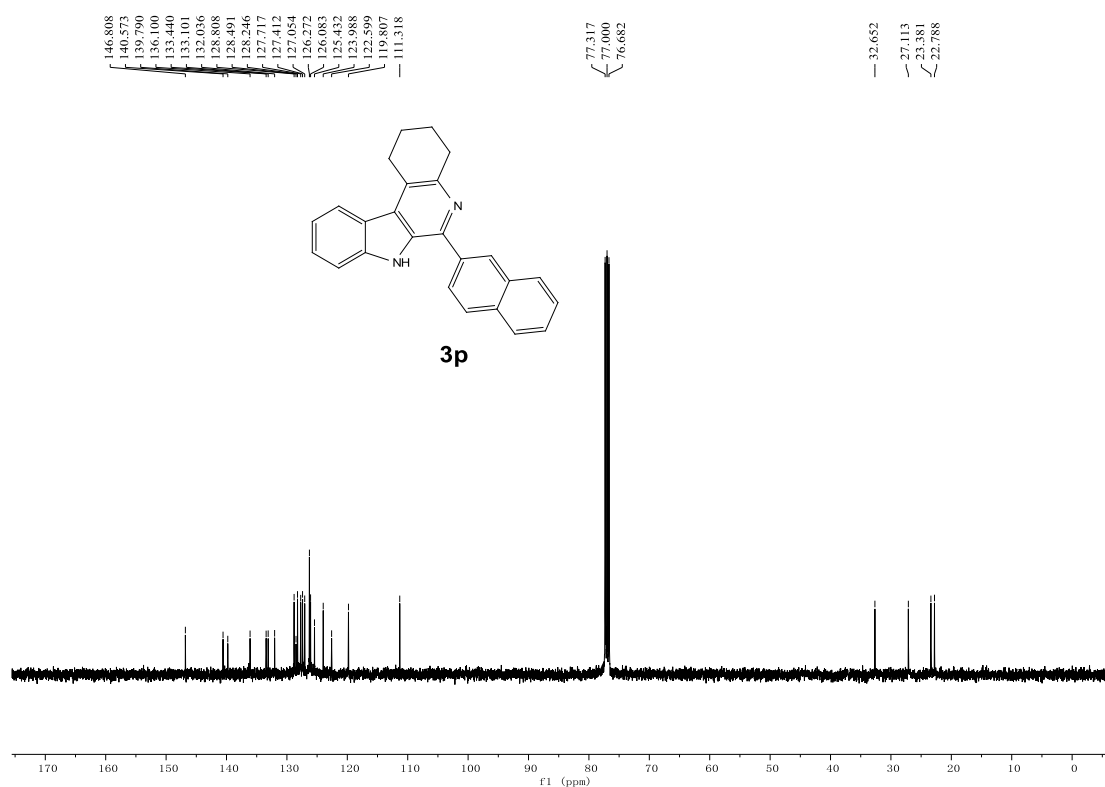

$^1\text{H}$  NMR of **3q** (400 MHz,  $\text{CDCl}_3$ ):

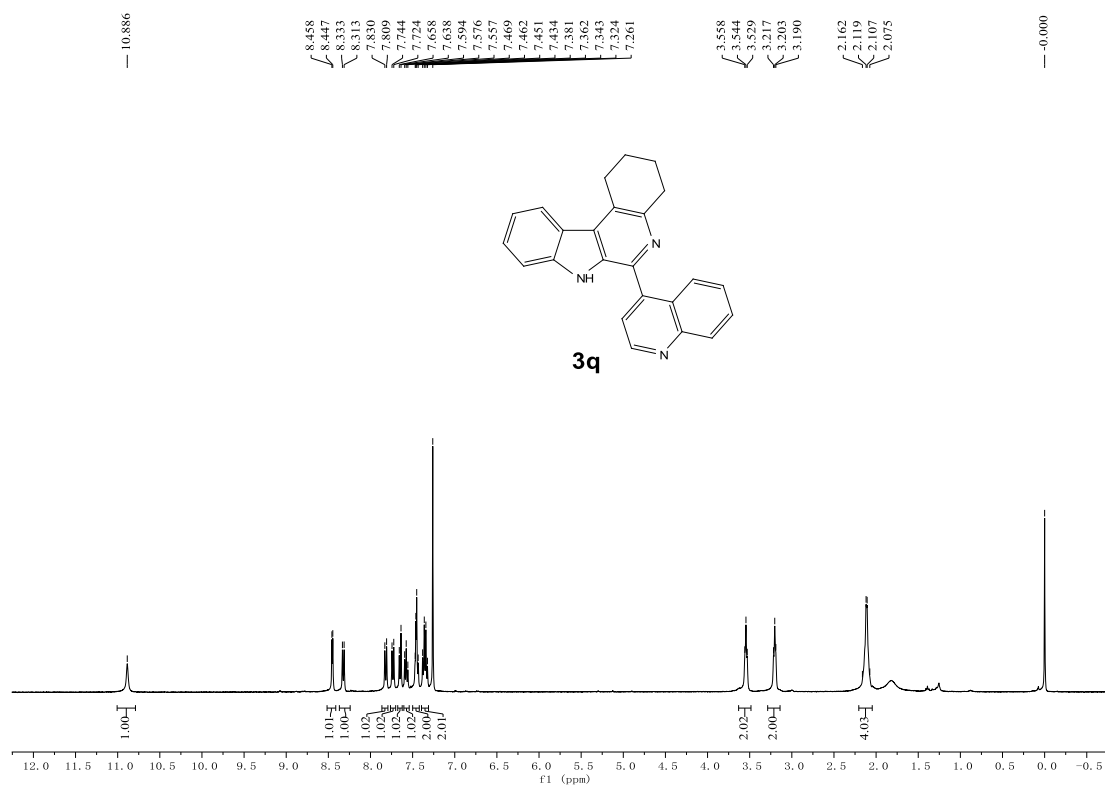

$^{13}\text{C}$  NMR of **3q** (400 MHz,  $\text{CDCl}_3$ ):

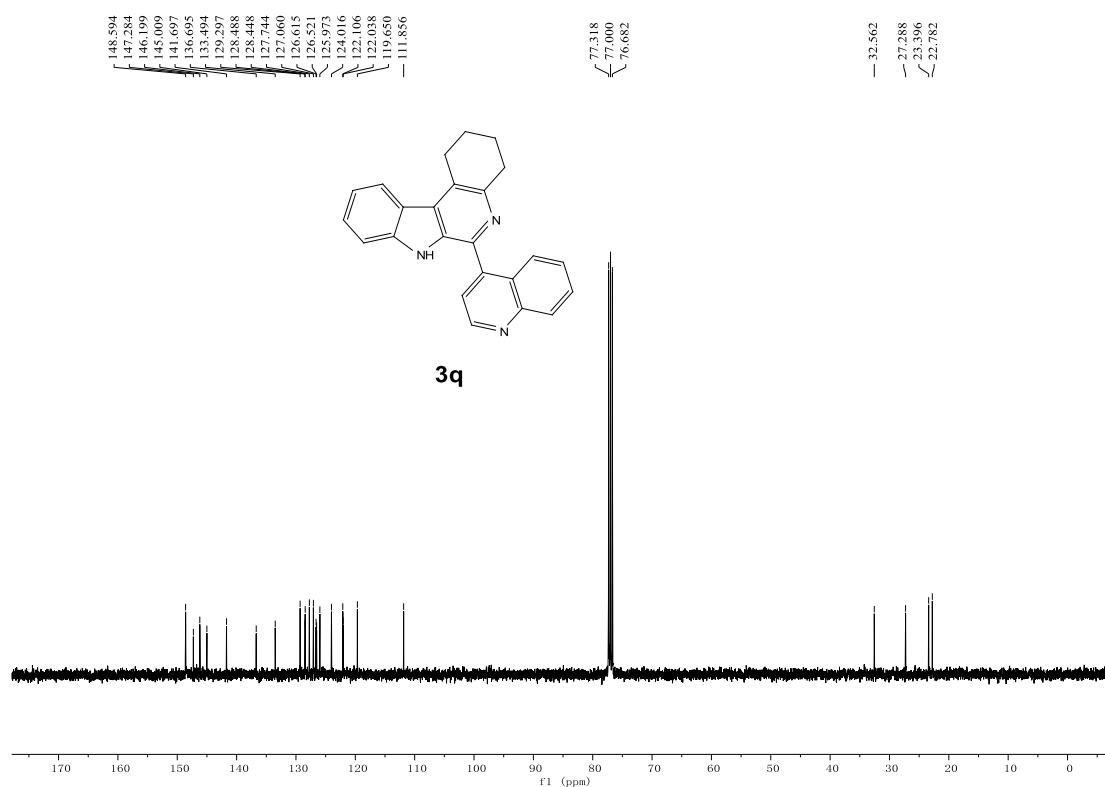

$^1\text{H}$  NMR of **3r** (400 MHz,  $\text{CDCl}_3$ ):

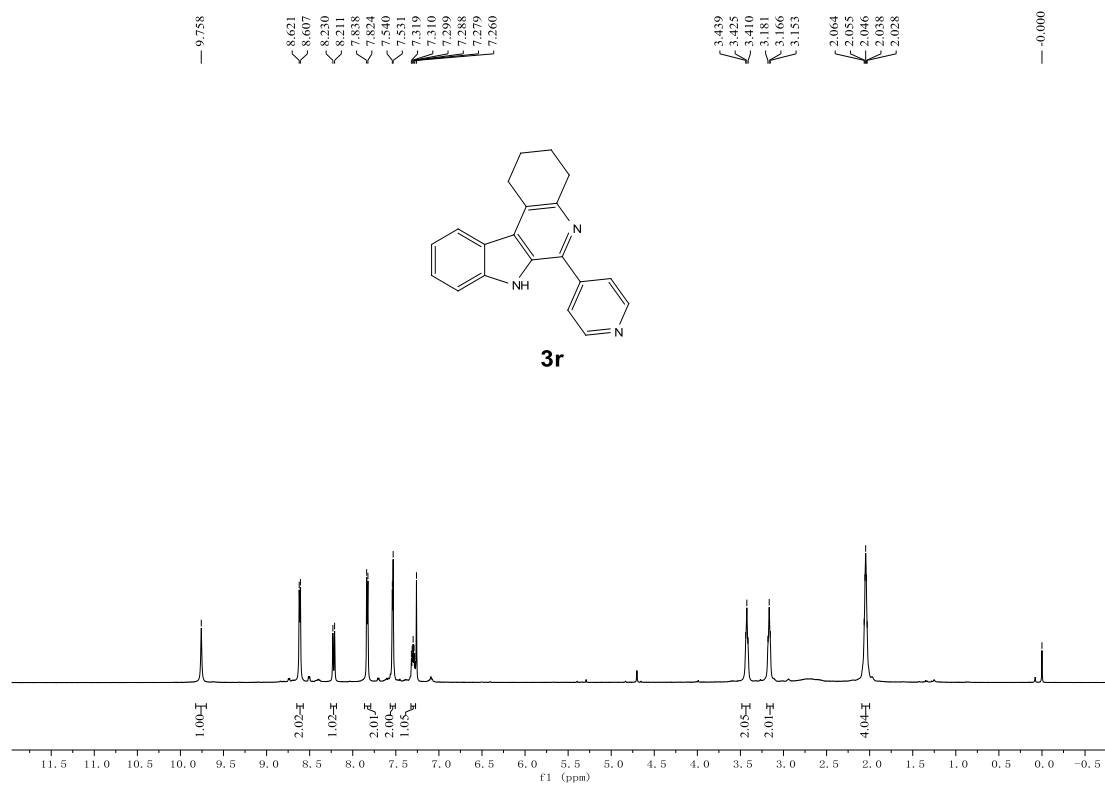

$^{13}\text{C}$  NMR of **3r** (400 MHz,  $\text{CDCl}_3$ ):

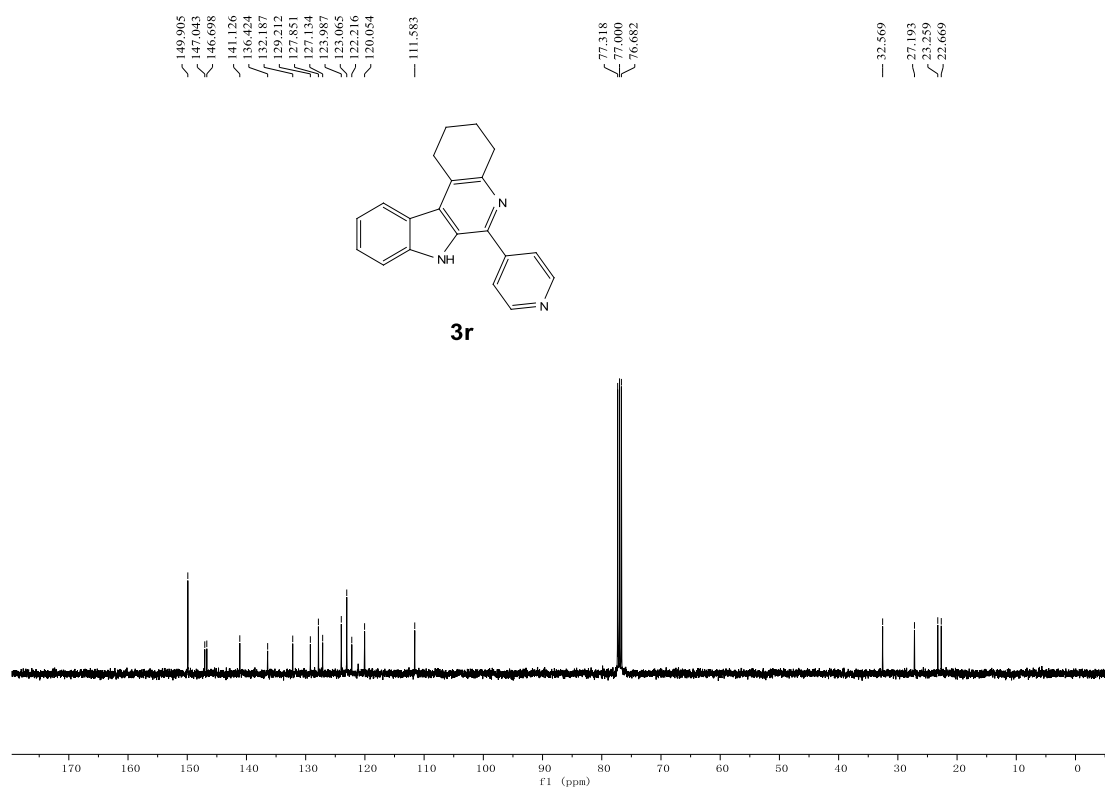

$^1\text{H}$  NMR of **3s** (400 MHz,  $\text{CDCl}_3$ ):

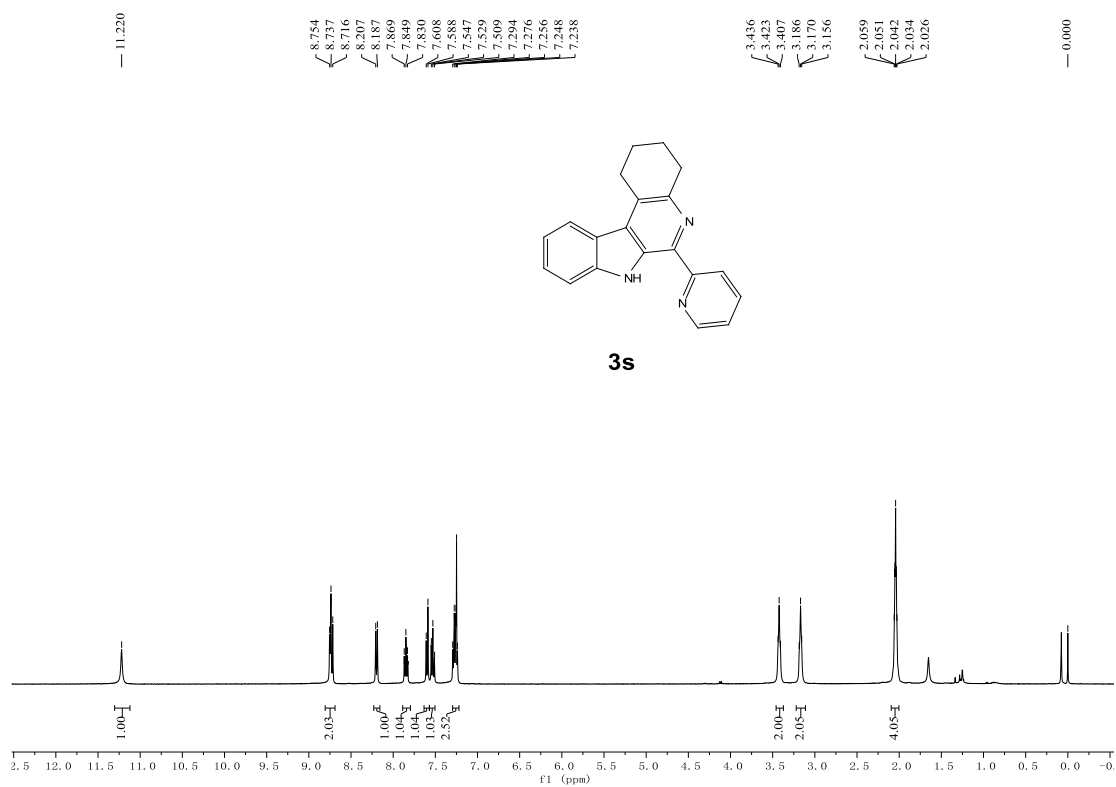

$^{13}\text{C}$  NMR of **3s** (400 MHz,  $\text{CDCl}_3$ ):

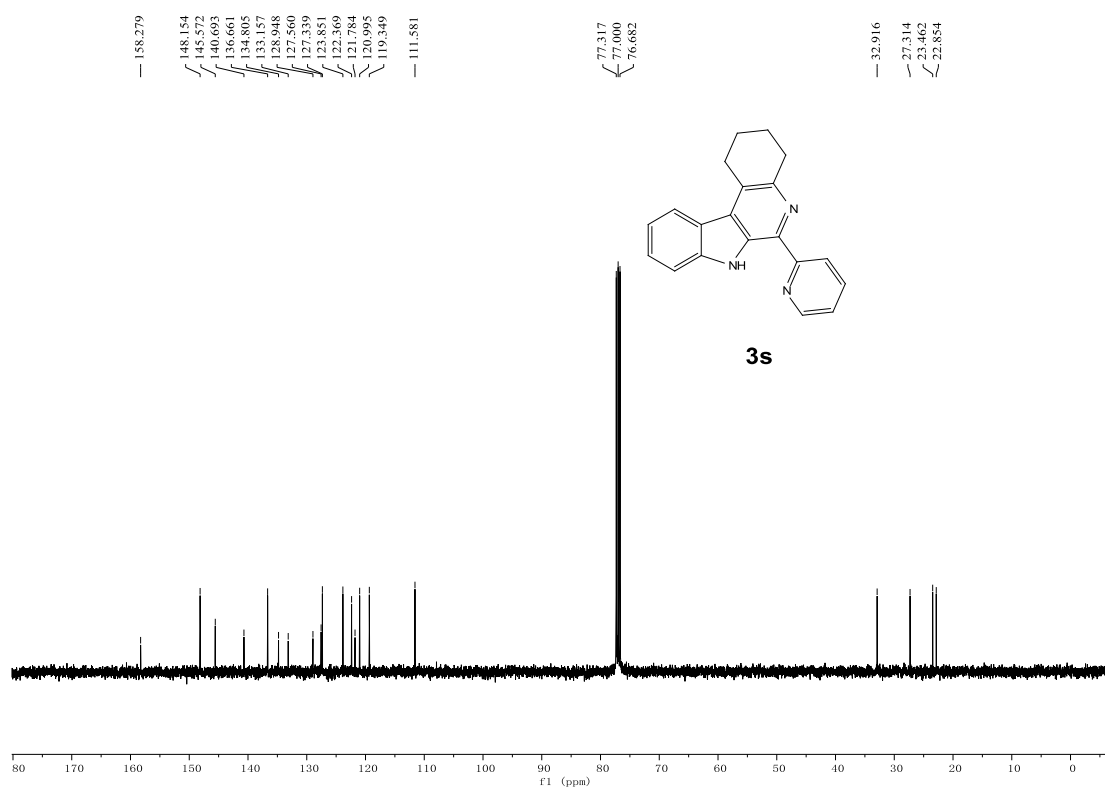

$^1\text{H}$  NMR of **3t** (400 MHz,  $\text{CDCl}_3$ ):

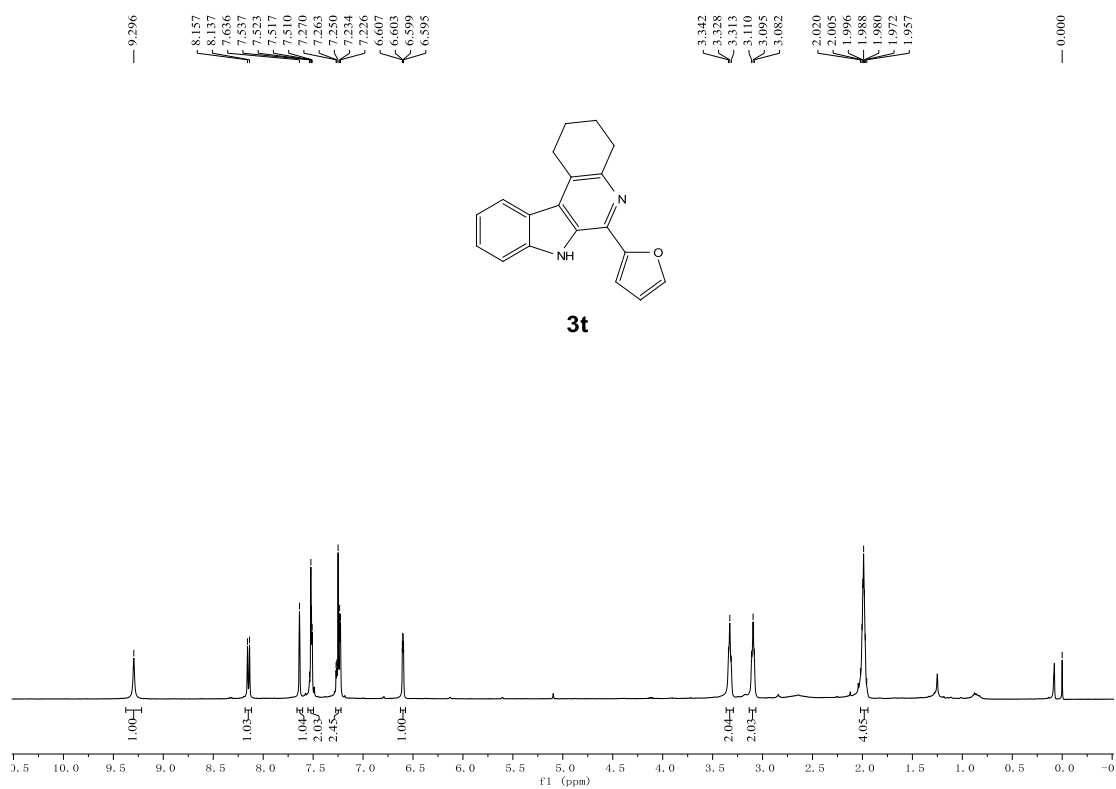

$^{13}\text{C}$  NMR of **3t** (400 MHz,  $\text{CDCl}_3$ ):

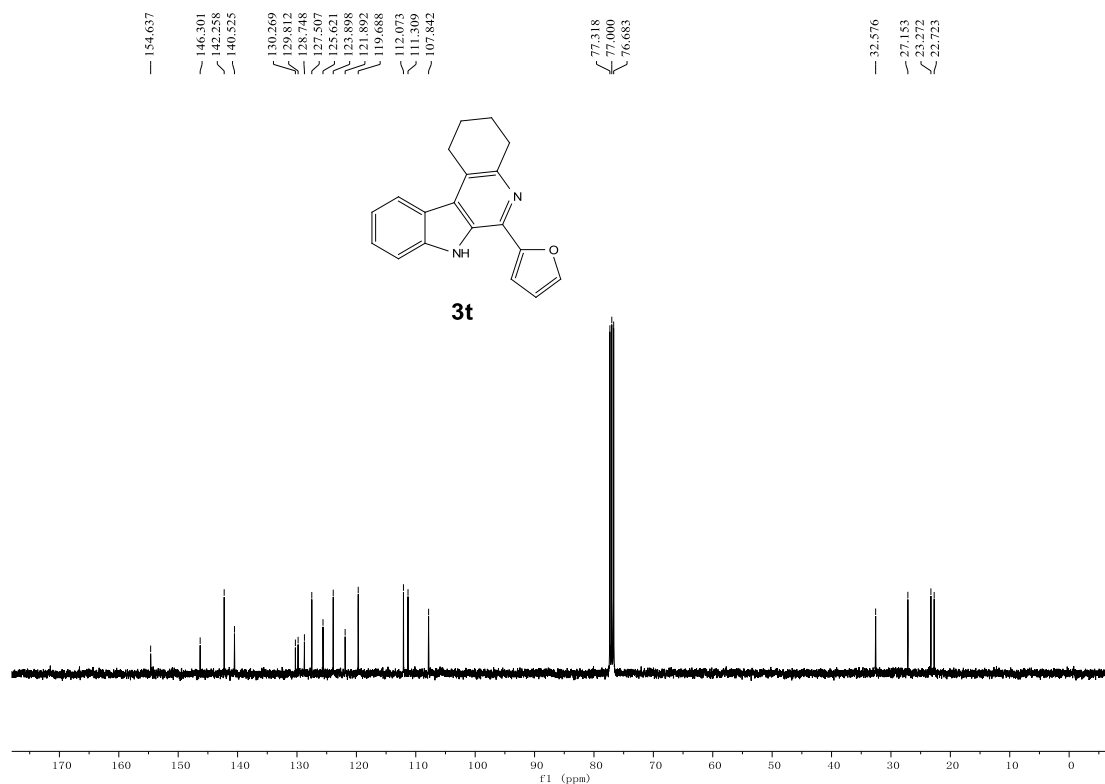

$^1\text{H}$  NMR of **3u** (400 MHz,  $\text{CDCl}_3$ ):

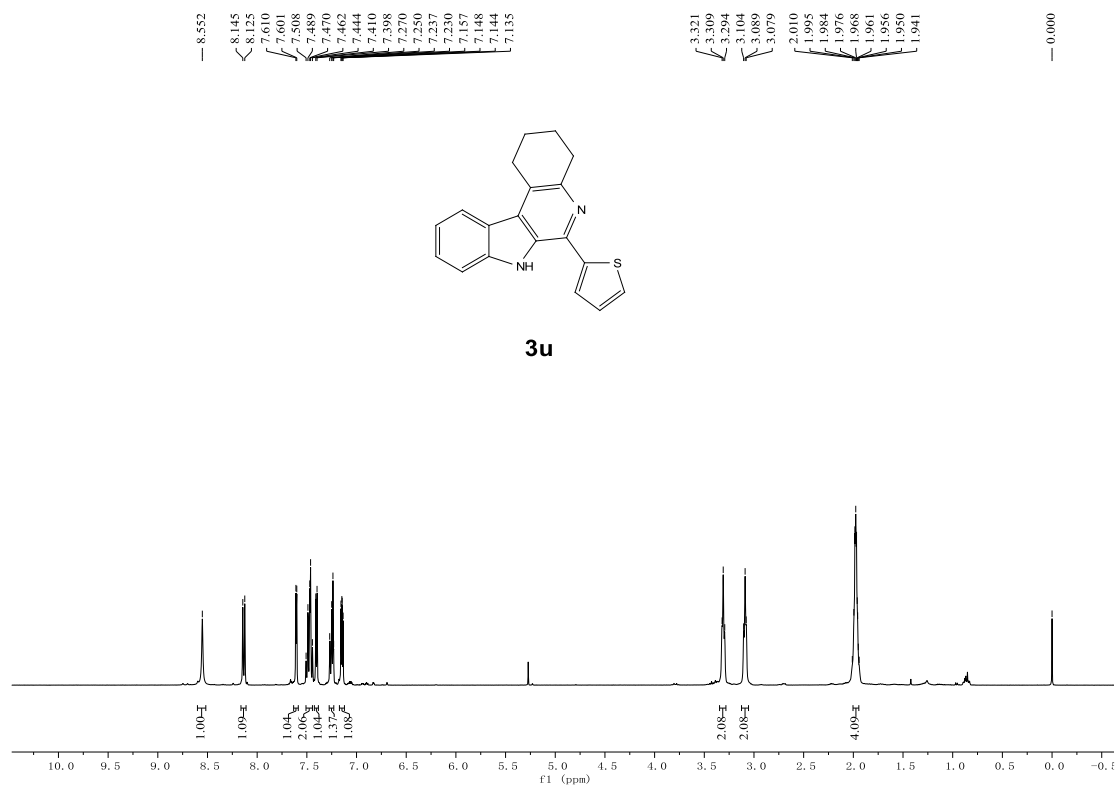

$^{13}\text{C}$  NMR of **3u** (400 MHz,  $\text{CDCl}_3$ ):

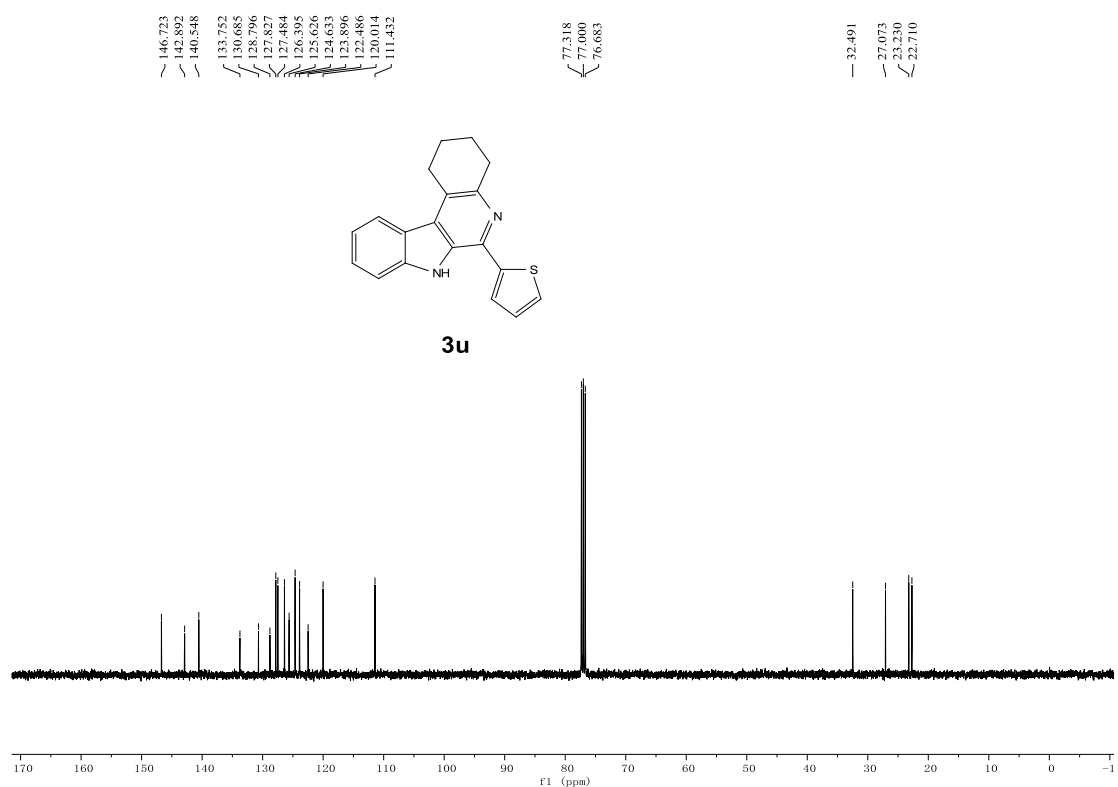

$^1\text{H}$  NMR of **3v** (400 MHz,  $\text{CDCl}_3$ ):

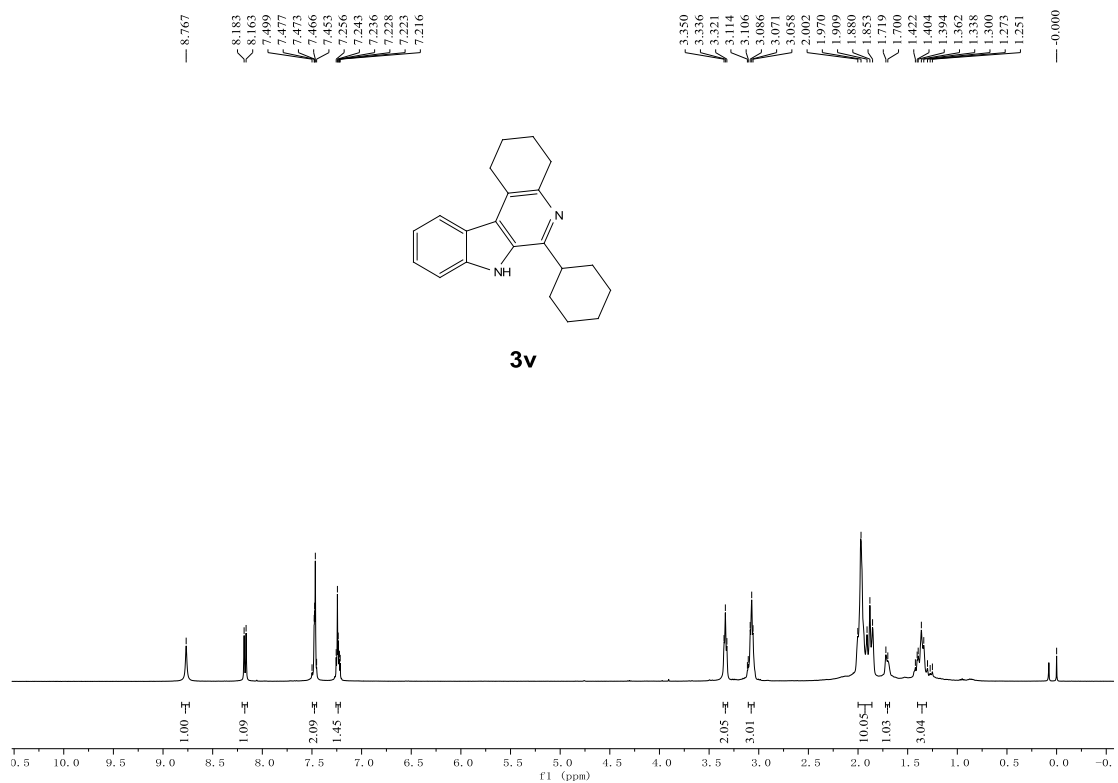

$^{13}\text{C}$  NMR of **3v** (400 MHz,  $\text{CDCl}_3$ ):

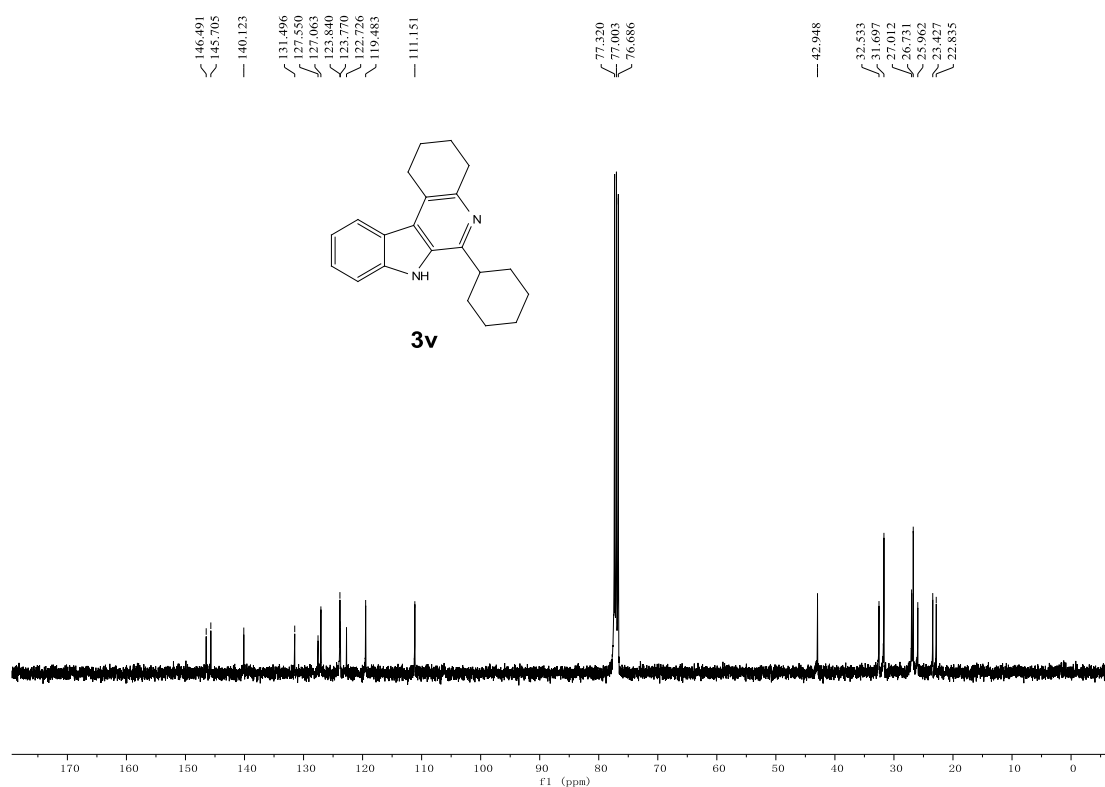

$^1\text{H}$  NMR of **3w** (400 MHz,  $\text{CDCl}_3$ ):

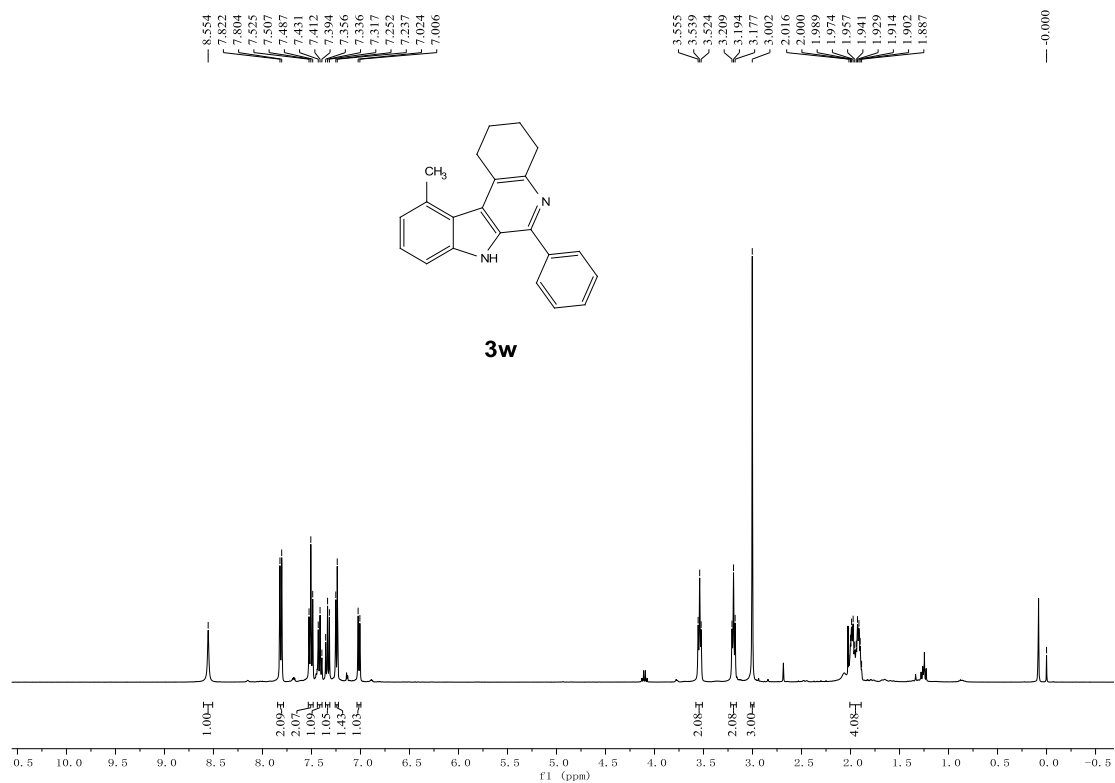

$^{13}\text{C}$  NMR of **3w** (400 MHz,  $\text{CDCl}_3$ ):

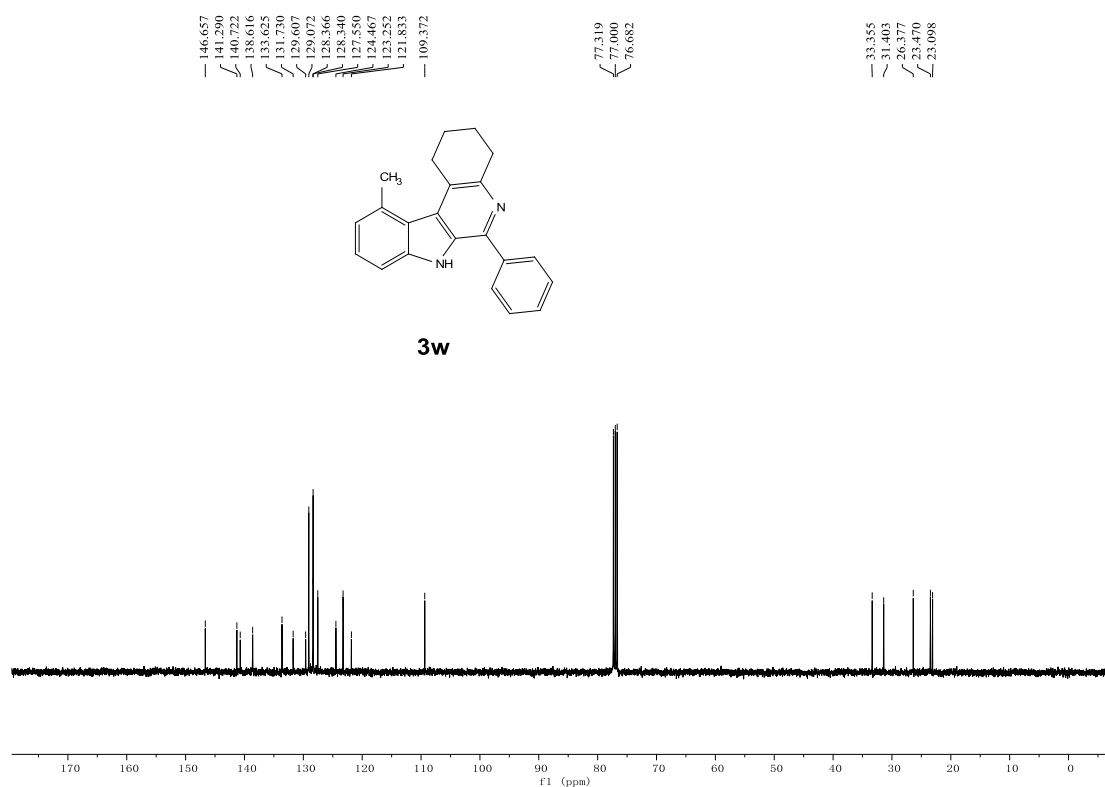

$^1\text{H}$  NMR of **3x** (400 MHz,  $\text{CDCl}_3$ ):

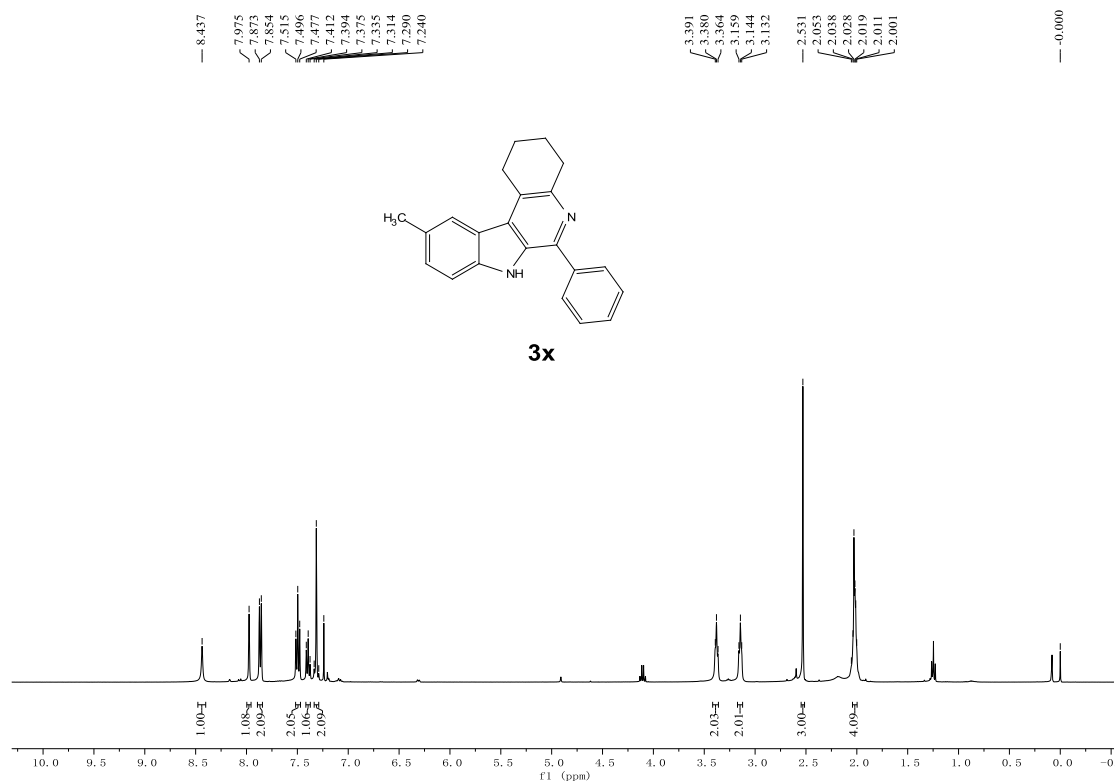



$^{13}\text{C}$  NMR of **3x** (400 MHz,  $\text{CDCl}_3$ ):

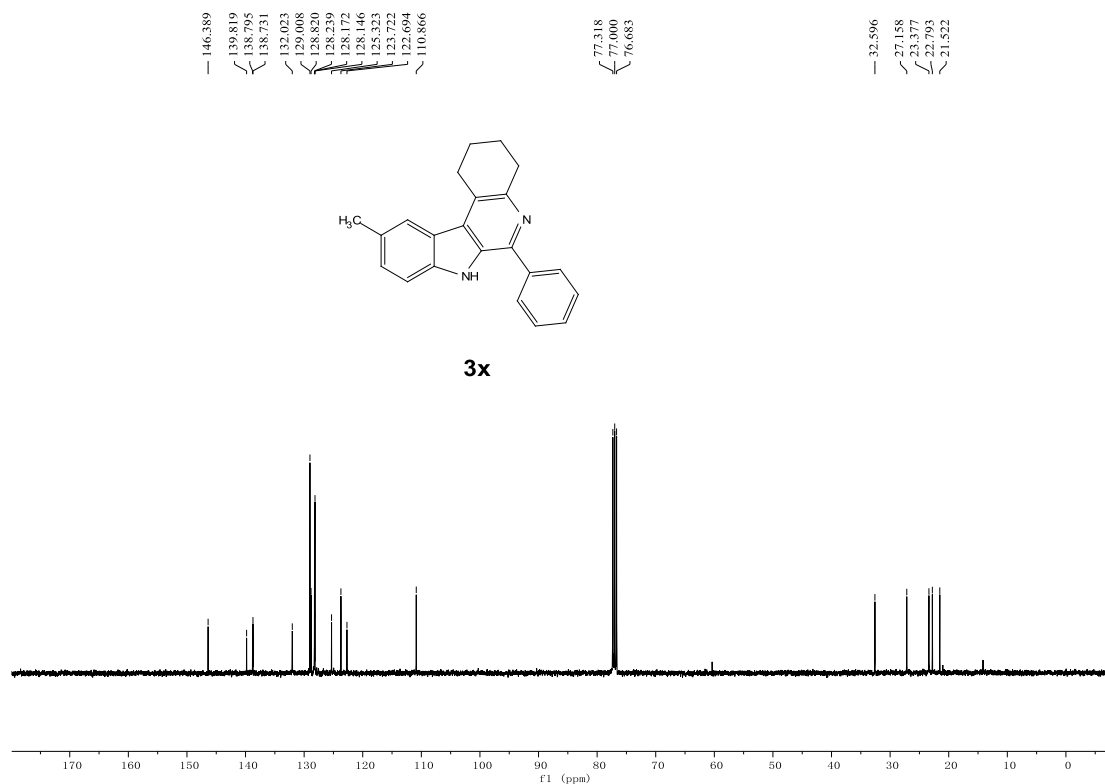

$^1\text{H}$  NMR of **3y** (400 MHz,  $\text{CDCl}_3$ ):

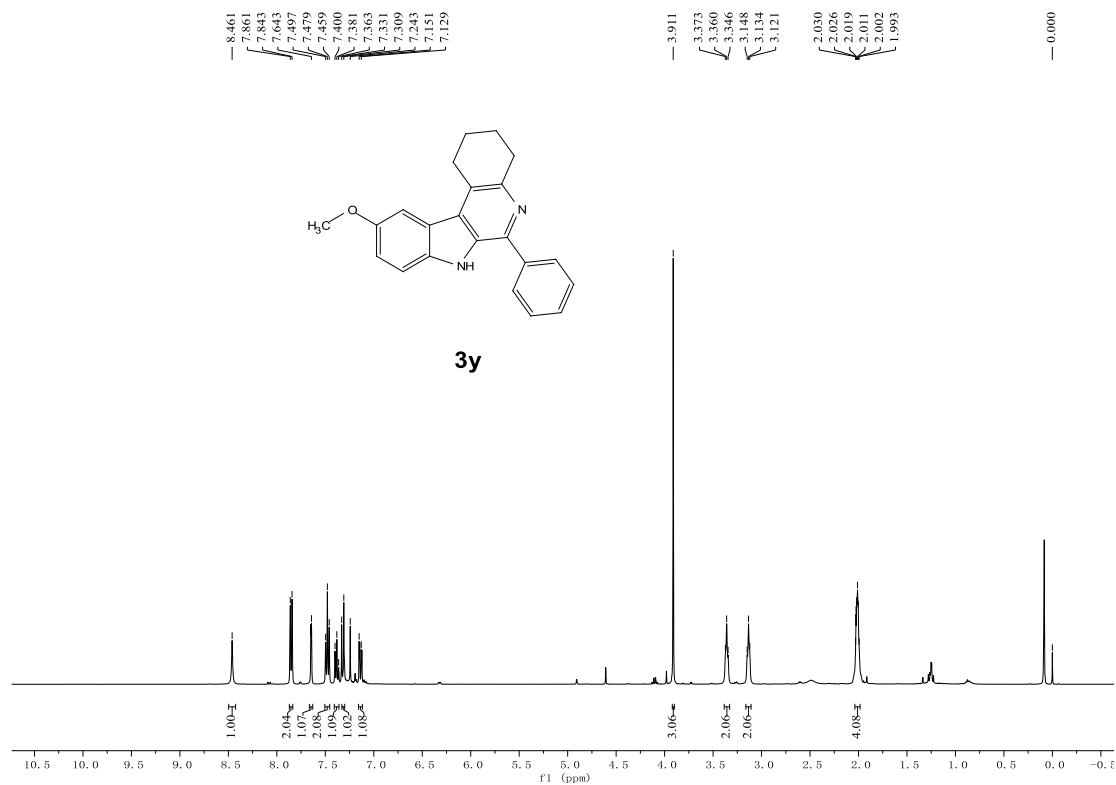

$^{13}\text{C}$  NMR of **3y** (400 MHz,  $\text{CDCl}_3$ ):

153.749  
146.083  
140.037  
138.683  
135.506  
132.478  
128.972  
128.261  
128.228  
128.112  
125.151  
122.818  
116.653  
111.851  
106.619  
77.318  
77.000  
76.684  
56.057  
32.507  
26.979  
23.311  
22.705

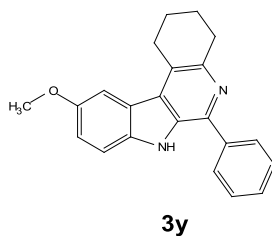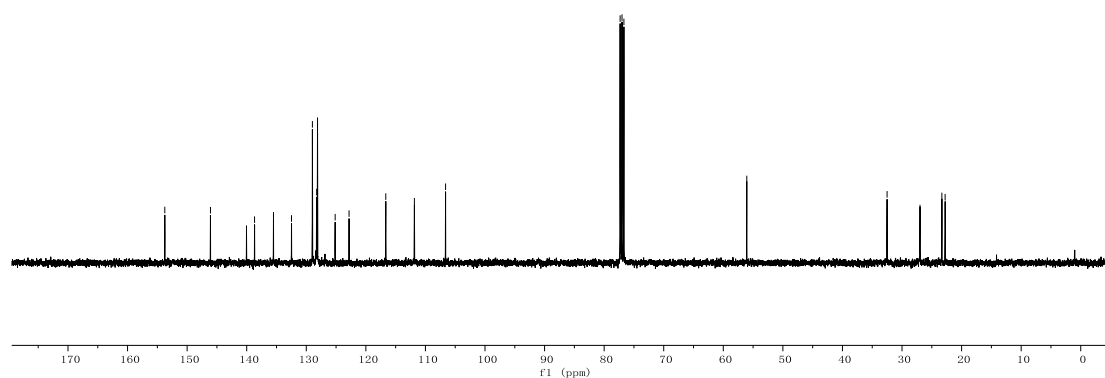

$^1\text{H}$  NMR of **3z** (400 MHz,  $\text{CDCl}_3$ ):

8.444  
7.871  
7.889  
7.871  
7.573  
7.555  
7.535  
7.484  
7.479  
7.464  
7.458  
7.437  
7.408  
7.386  
7.261  
3.375  
3.362  
3.347  
3.175  
3.161  
3.148  
2.074  
2.059  
2.050  
2.045  
2.040  
2.033  
2.021  
1.665  
-0.000

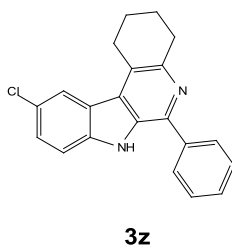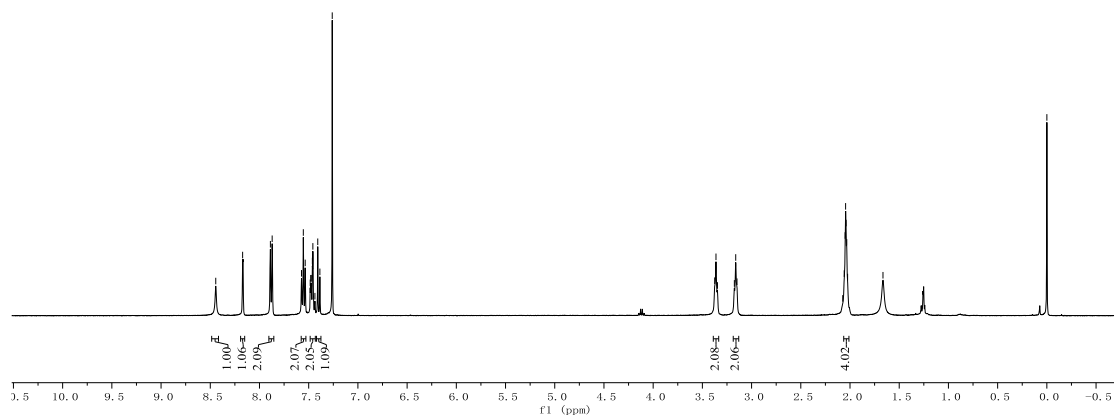

$^{13}\text{C}$  NMR of **3z** (400 MHz,  $\text{CDCl}_3$ ):

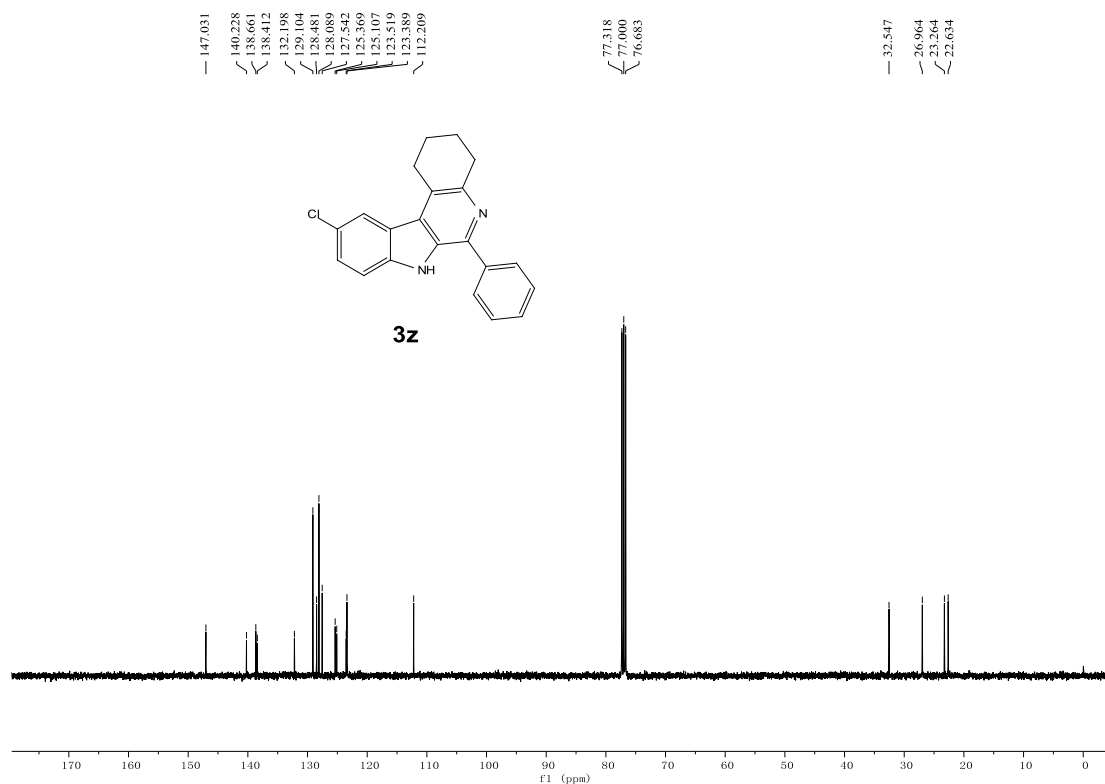

$^1\text{H}$  NMR of **3aa** (400 MHz,  $\text{CDCl}_3$ ):

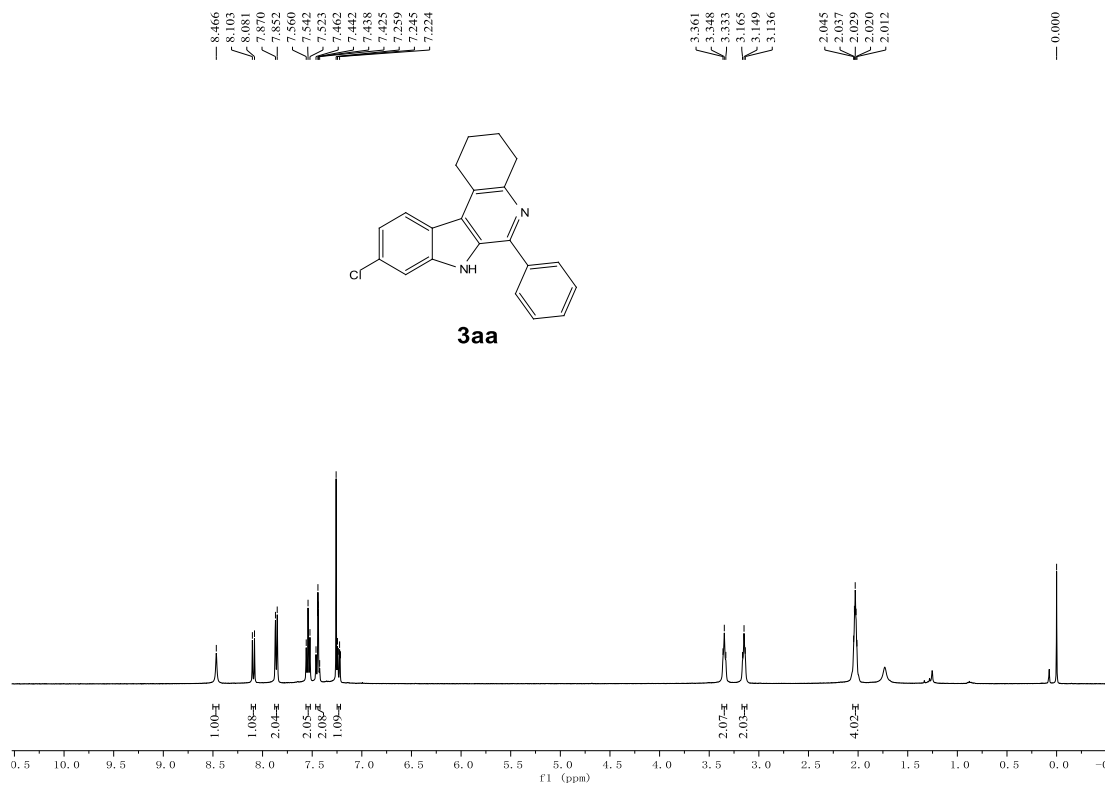

<sup>13</sup>C NMR of **3aa** (400 MHz, CDCl<sub>3</sub>):

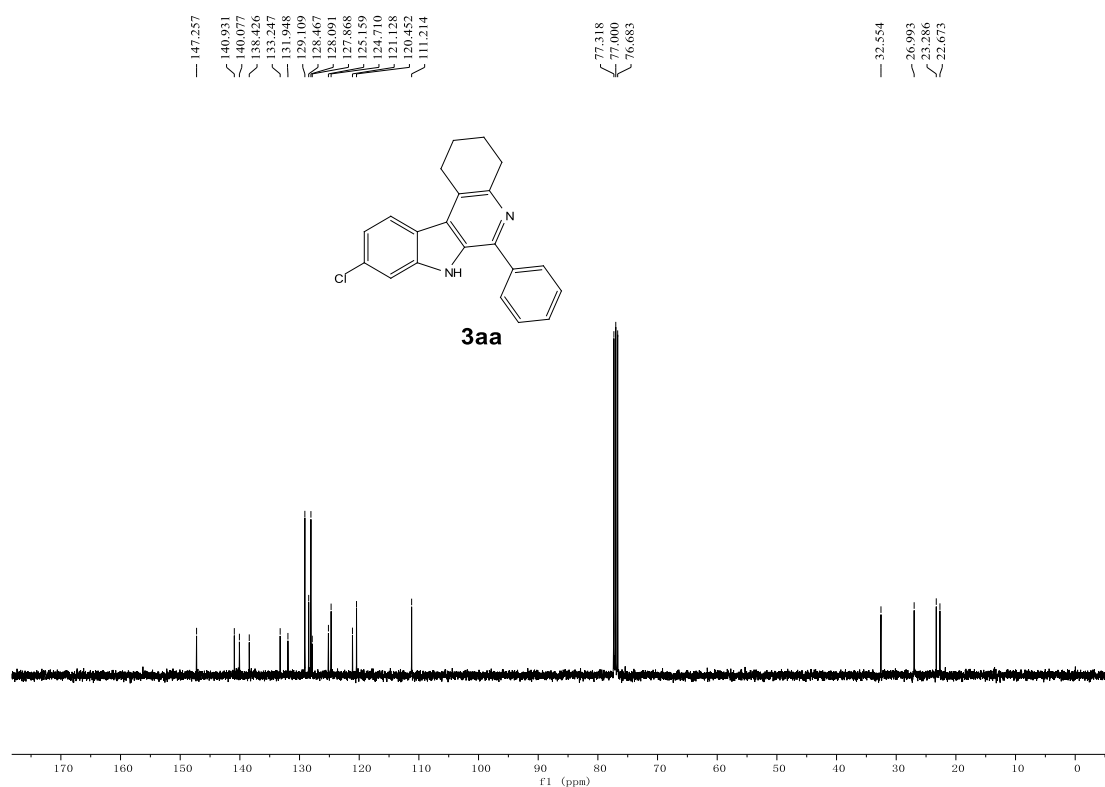

<sup>1</sup>H NMR of **3ab** (400 MHz, CDCl<sub>3</sub>):

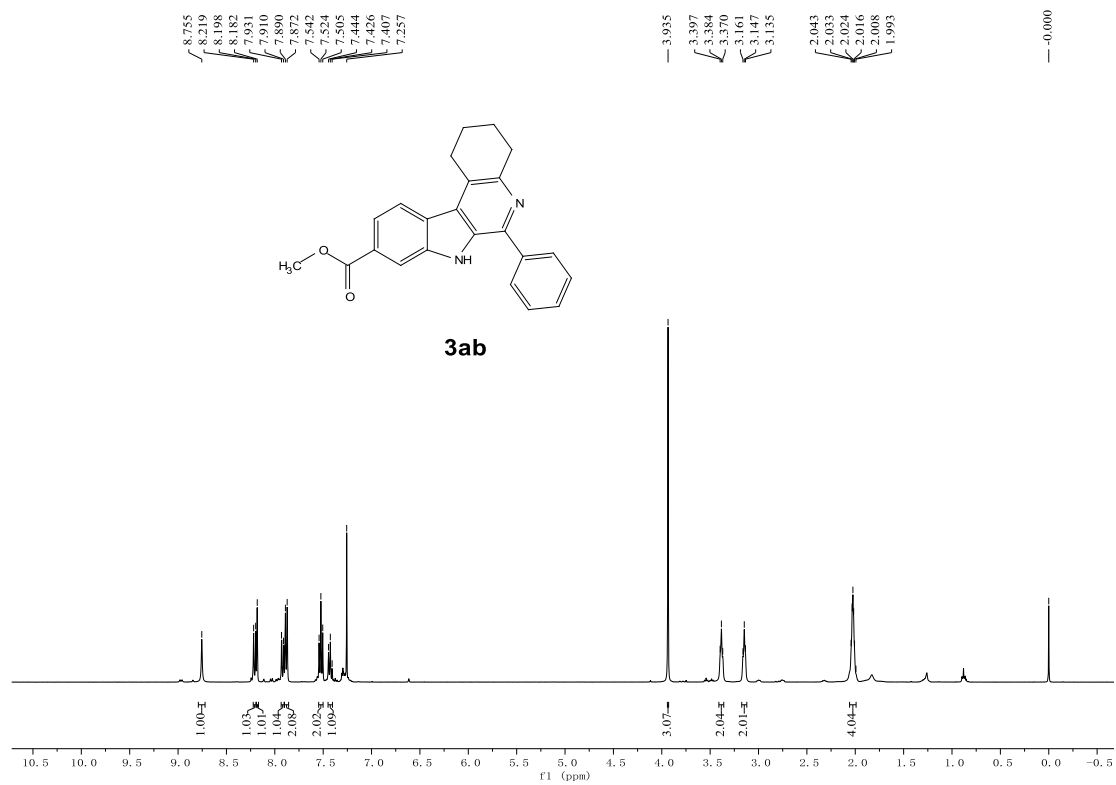

<sup>13</sup>C NMR of **3ab** (400 MHz, CDCl<sub>3</sub>):

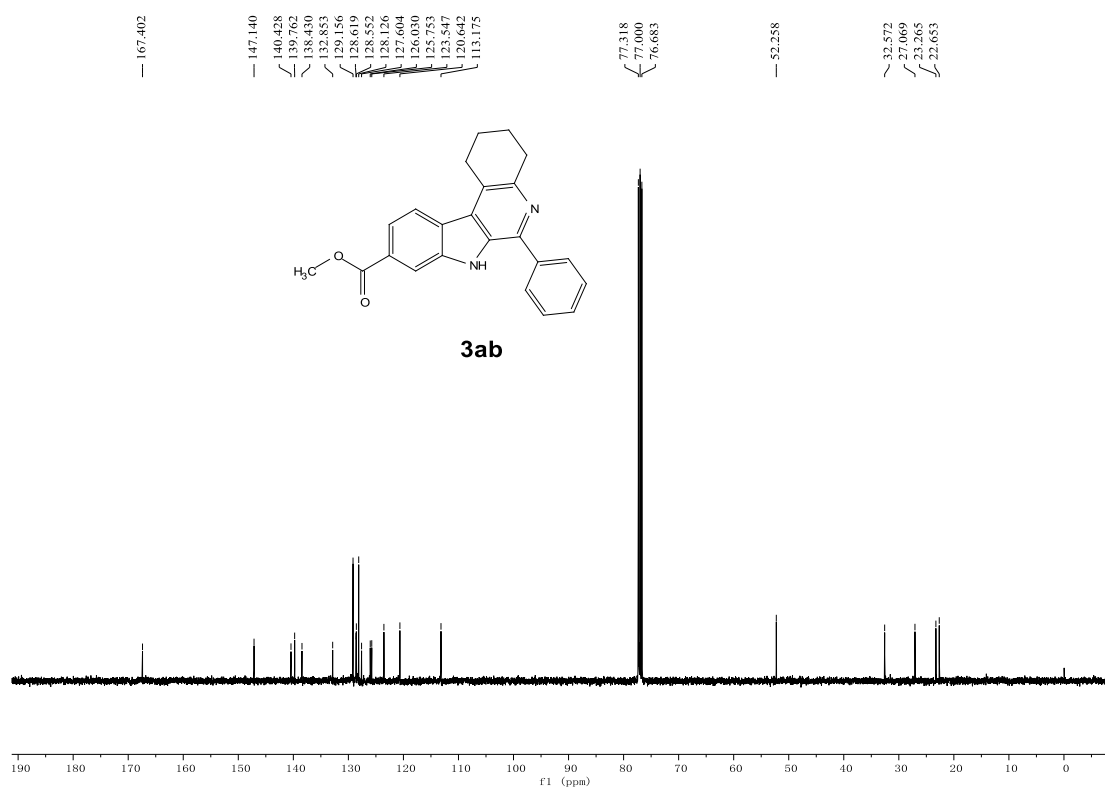

<sup>1</sup>H NMR of **3ac** (400 MHz, CDCl<sub>3</sub>):

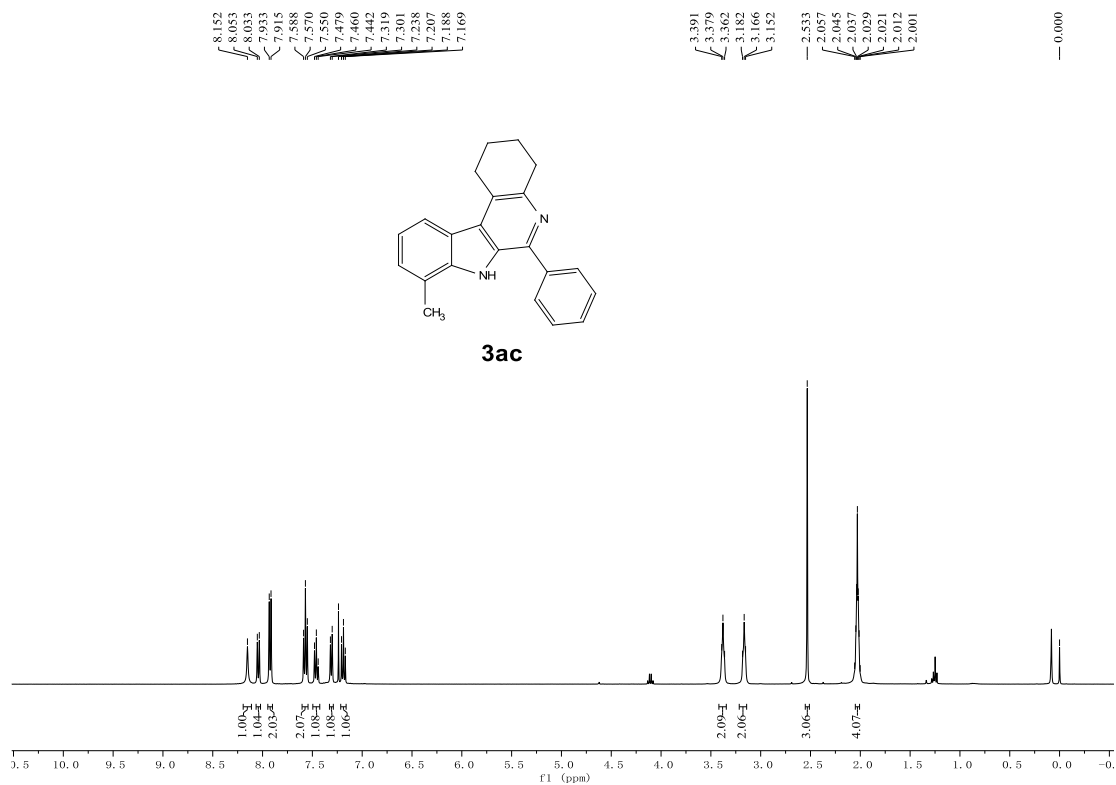

$^{13}\text{C}$  NMR of **3ac** (400 MHz,  $\text{CDCl}_3$ ):

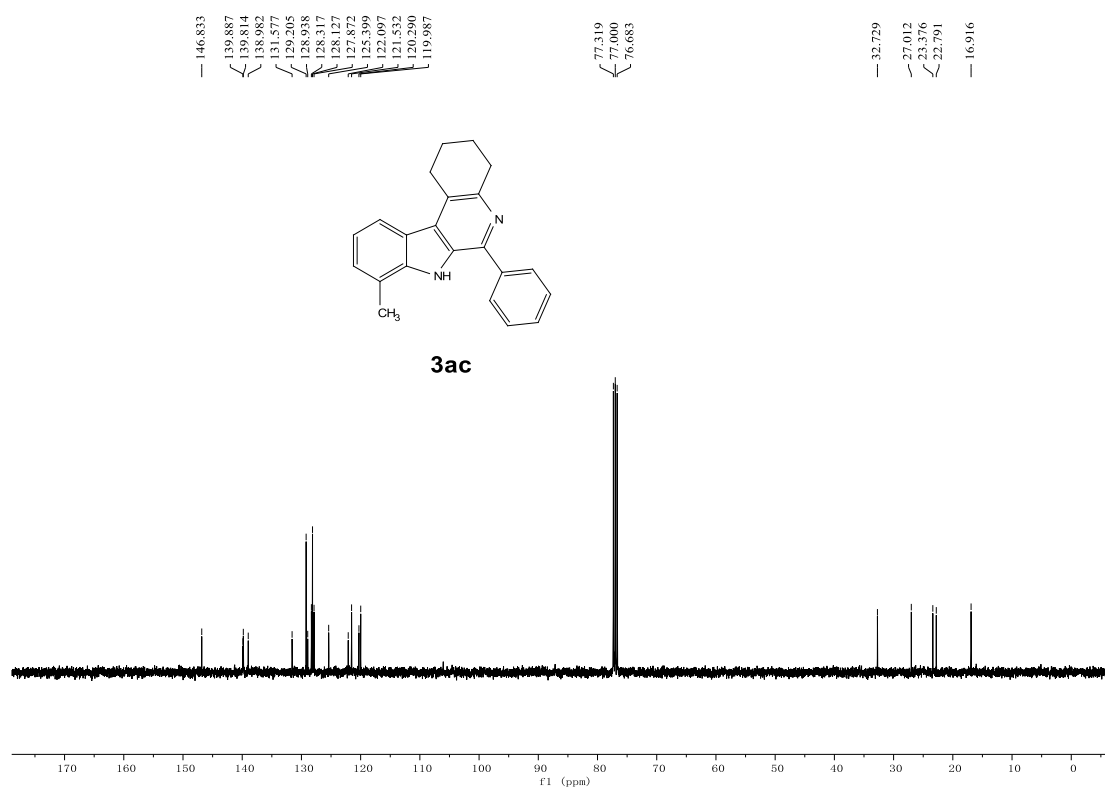

$^1\text{H}$  NMR of **3ad** (400 MHz,  $\text{CDCl}_3$ ):

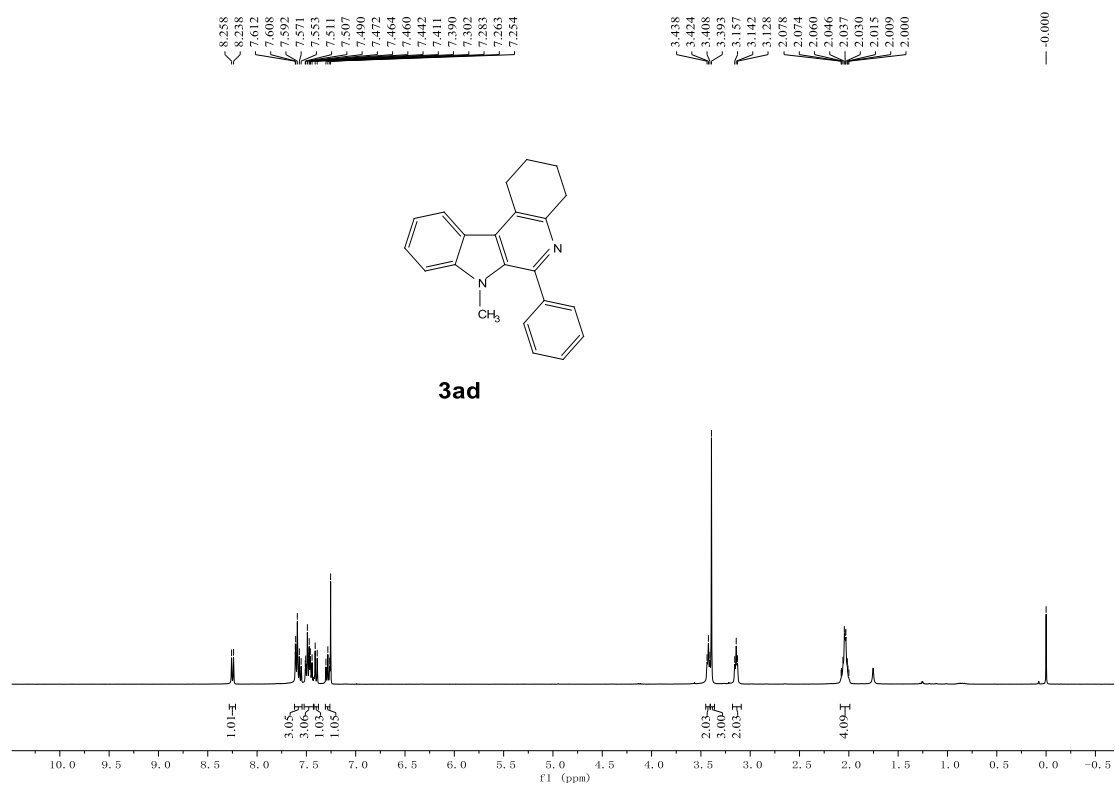

$^{13}\text{C}$  NMR of **3ad** (400 MHz,  $\text{CDCl}_3$ ):

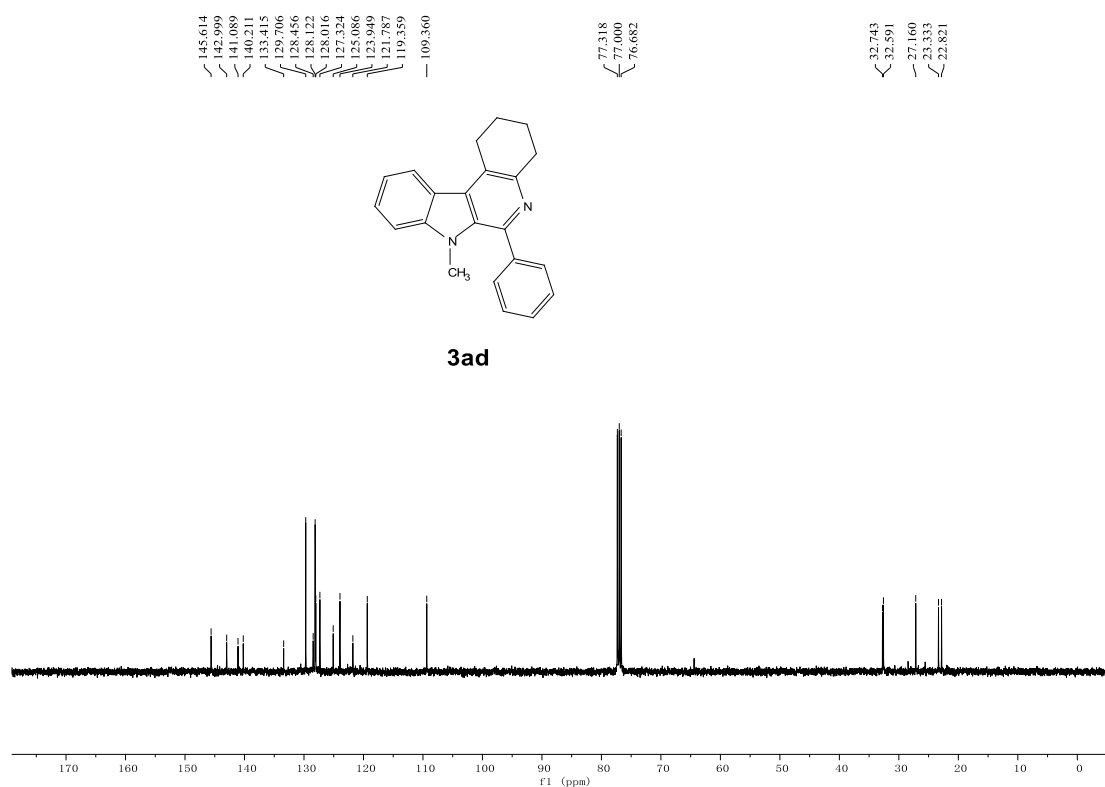

$^1\text{H}$  NMR of **3ae** (400 MHz,  $\text{CDCl}_3$ ):

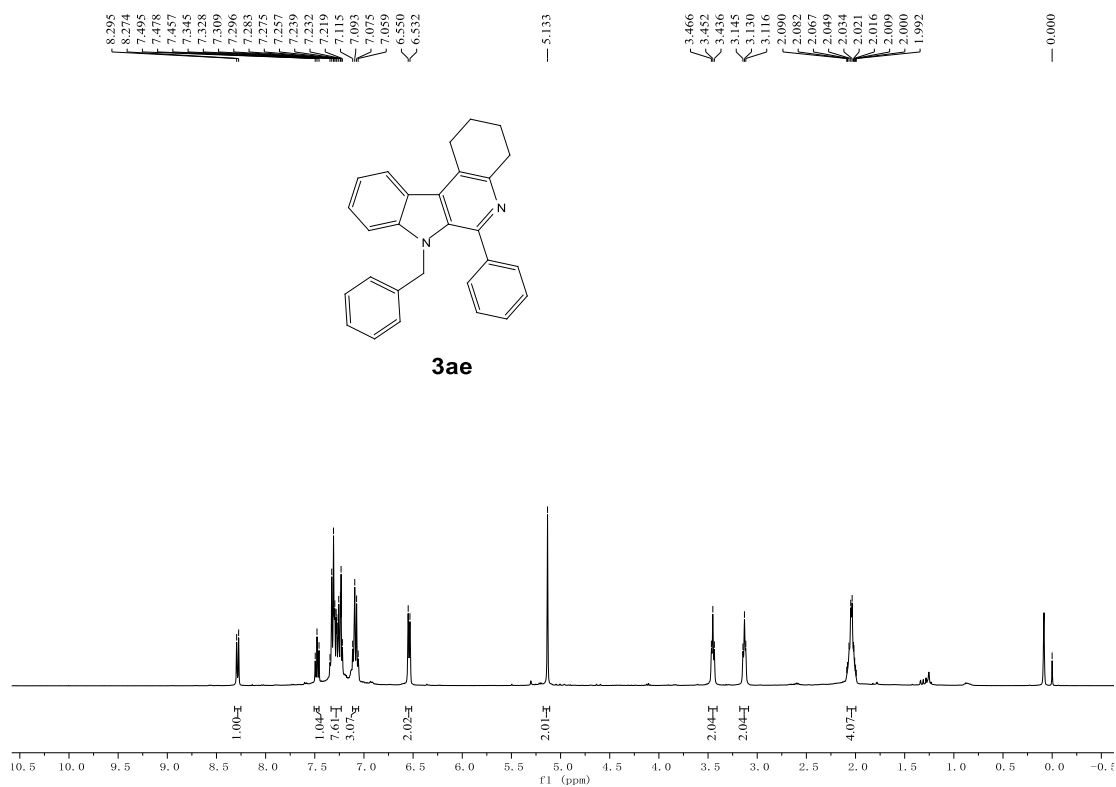

<sup>13</sup>C NMR of **3ae** (400 MHz, CDCl<sub>3</sub>):

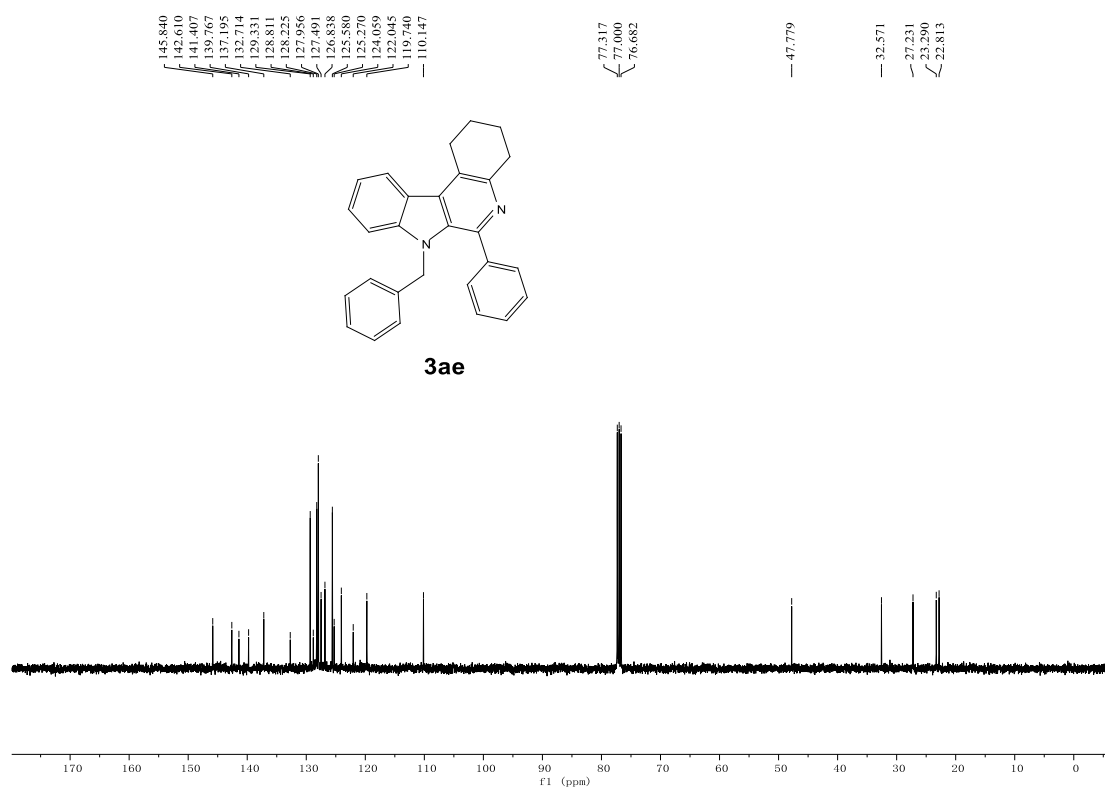

<sup>1</sup>H NMR of **3af** (400 MHz, CDCl<sub>3</sub>):

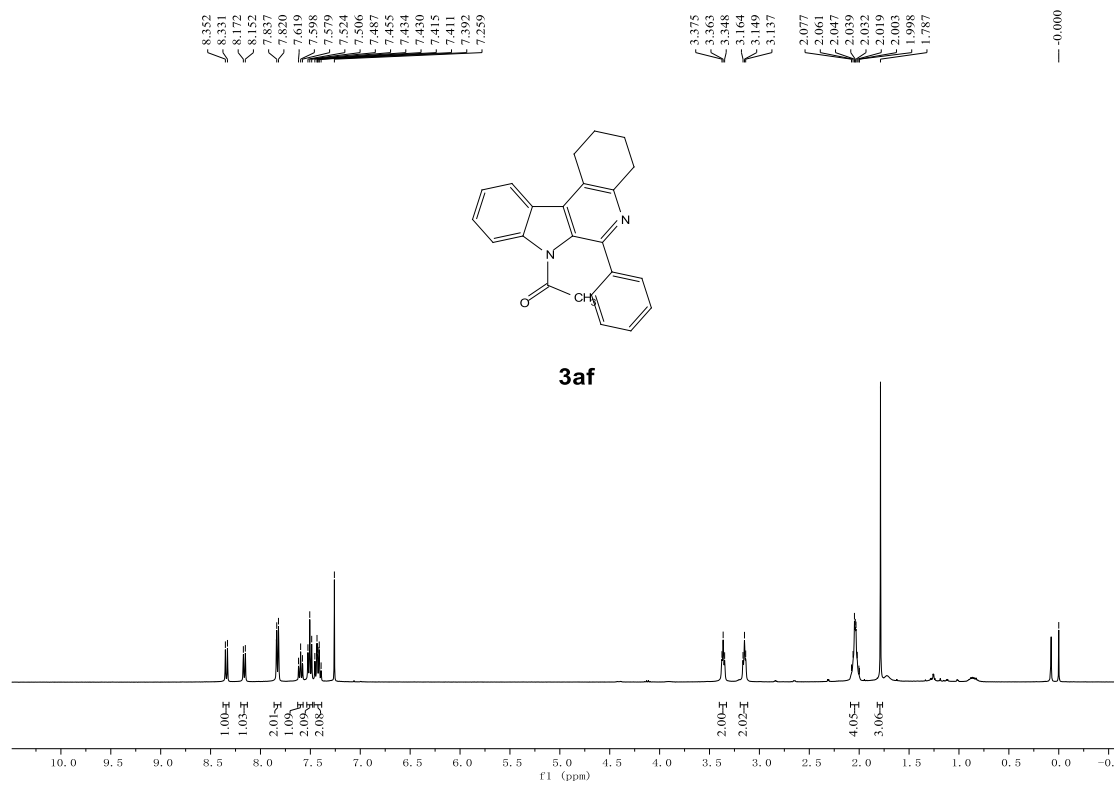



$^{13}\text{C}$  NMR of **3af** (400 MHz,  $\text{CDCl}_3$ ):

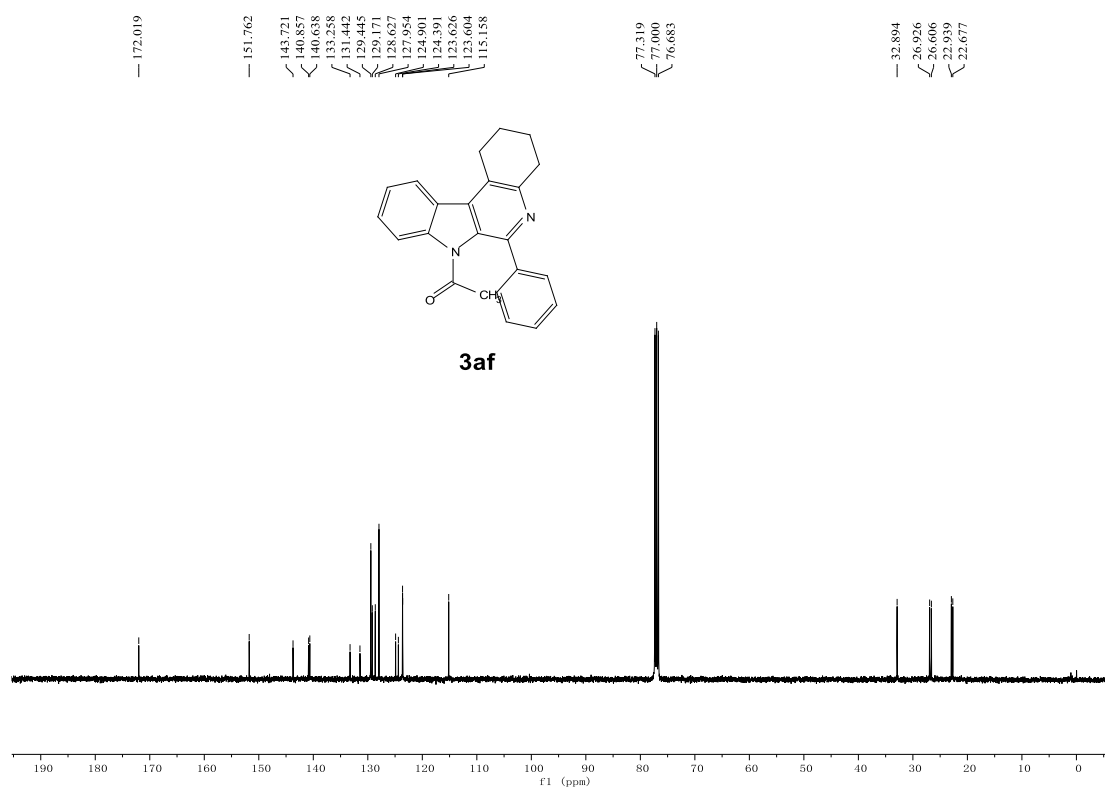

$^1\text{H}$  NMR of **3ag** (400 MHz,  $\text{CDCl}_3$ ):

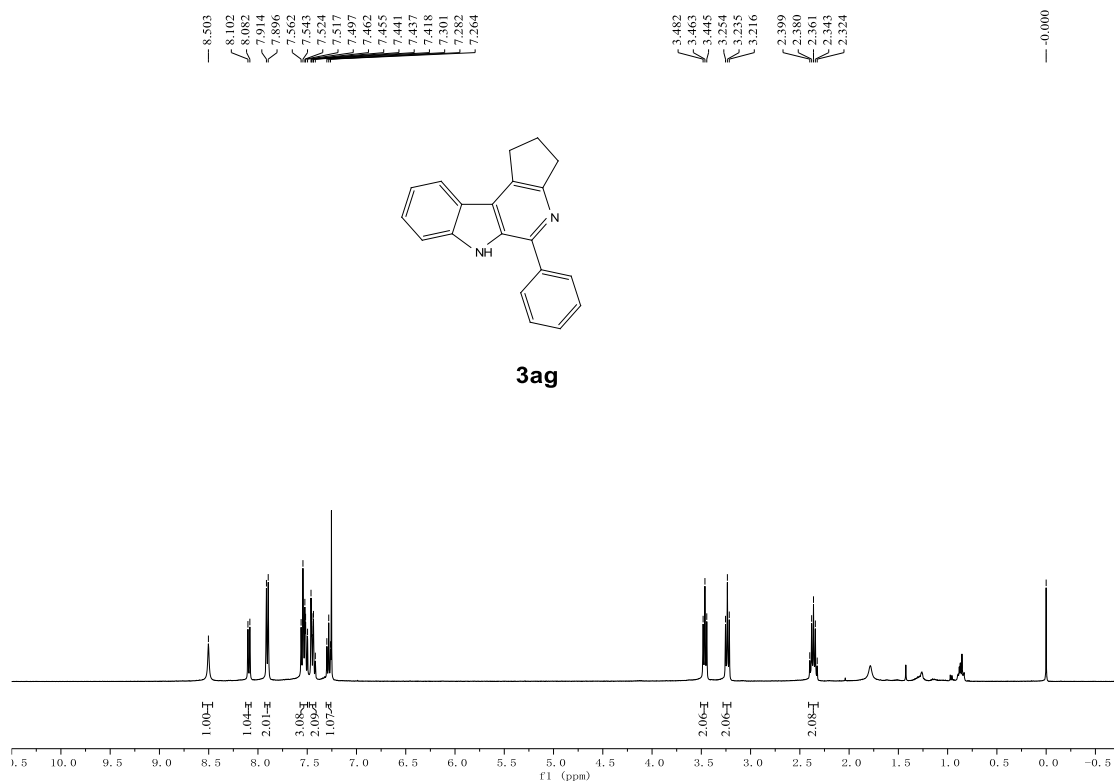

$^{13}\text{C}$  NMR of **3ag** (400 MHz,  $\text{CDCl}_3$ ):

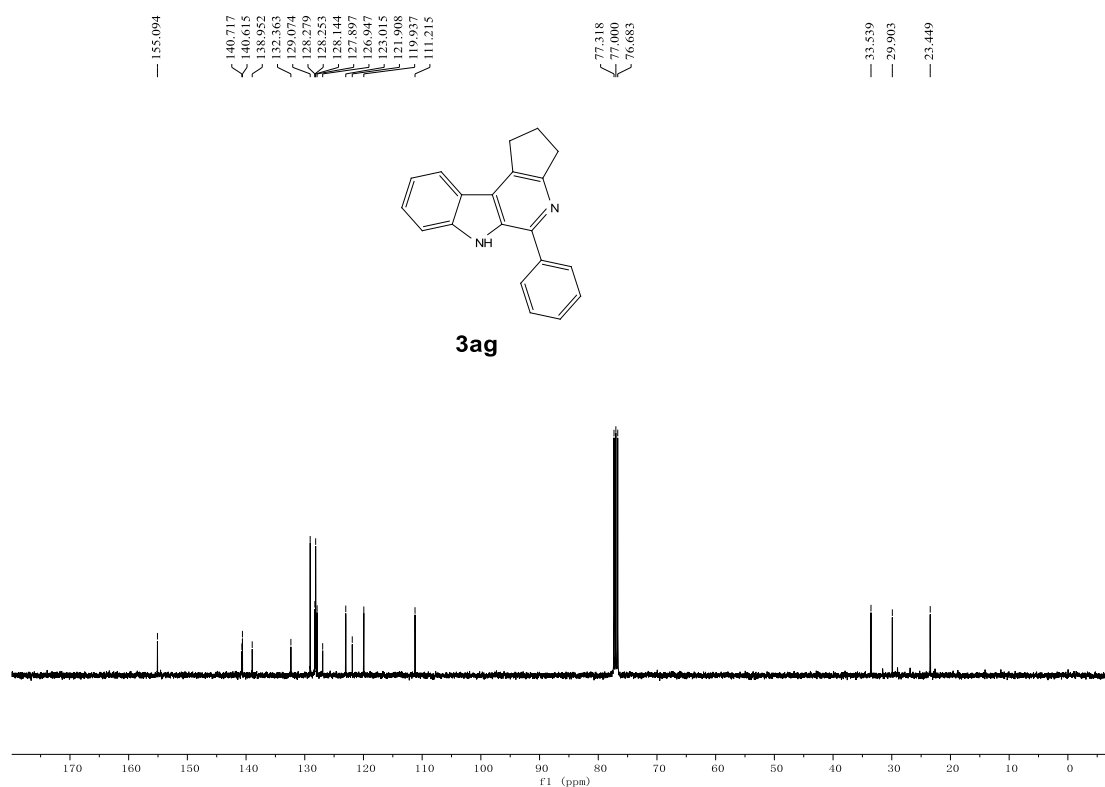

$^1\text{H}$  NMR of **3ah** (400 MHz,  $\text{CDCl}_3$ ):

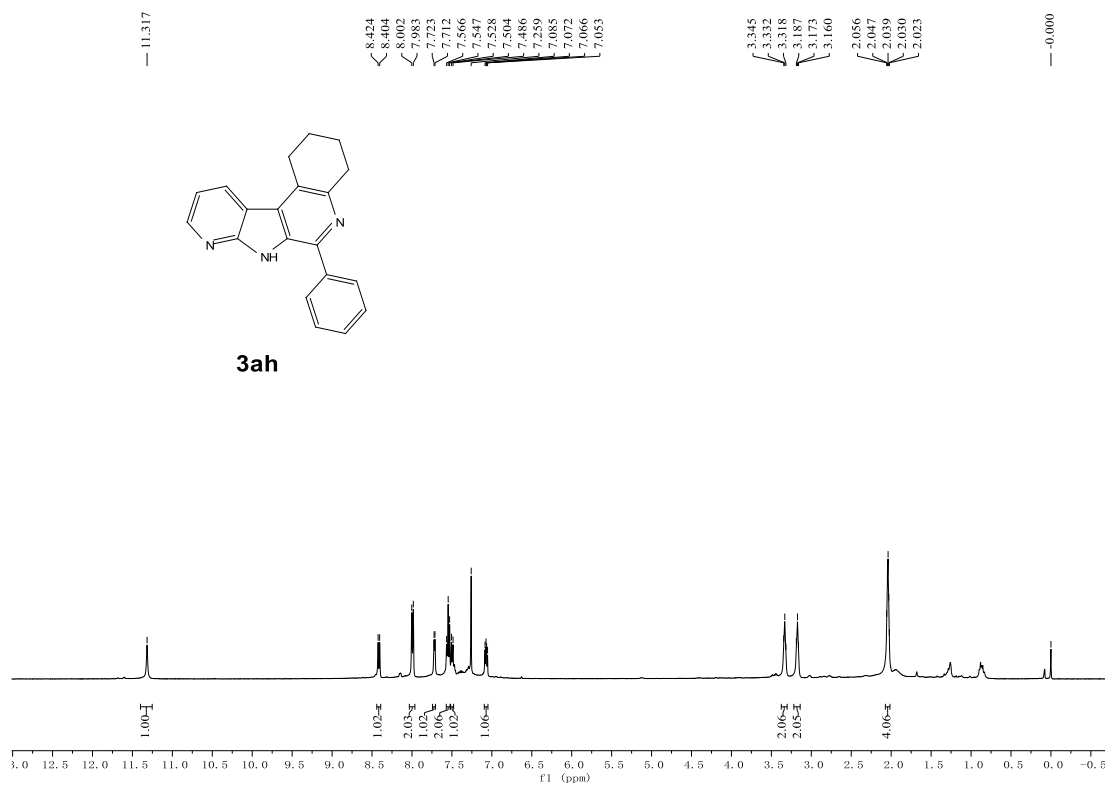

<sup>13</sup>C NMR of **3ah** (400 MHz, CDCl<sub>3</sub>):

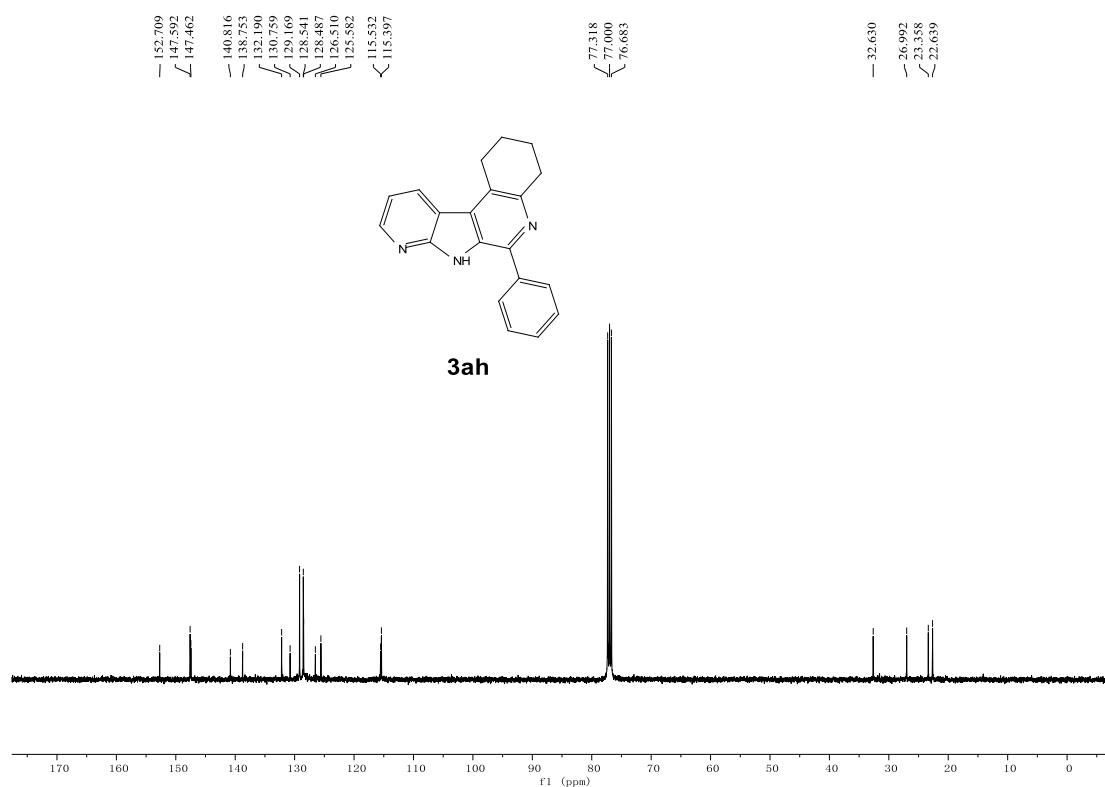

<sup>1</sup>H NMR of **4a** (400 MHz, CDCl<sub>3</sub>):

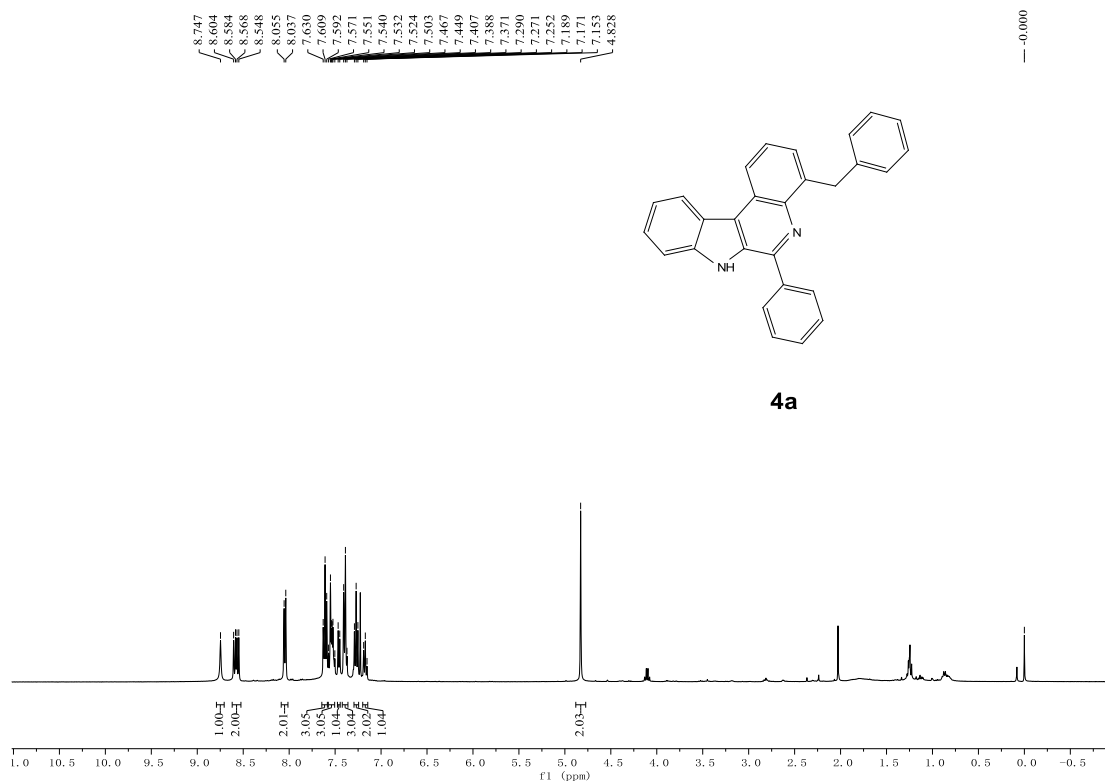



$^{13}\text{C}$  NMR of **4b** (400 MHz,  $\text{CDCl}_3$ ):

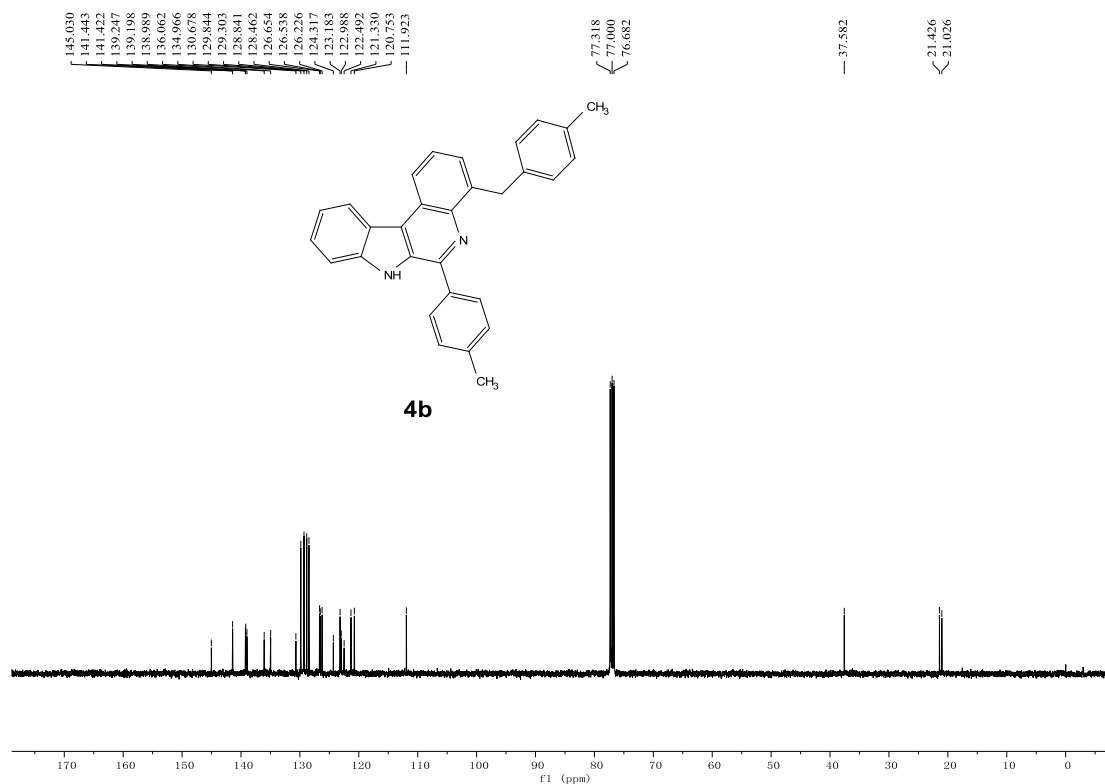

$^1\text{H}$  NMR of **4c** (400 MHz,  $\text{CDCl}_3$ ):

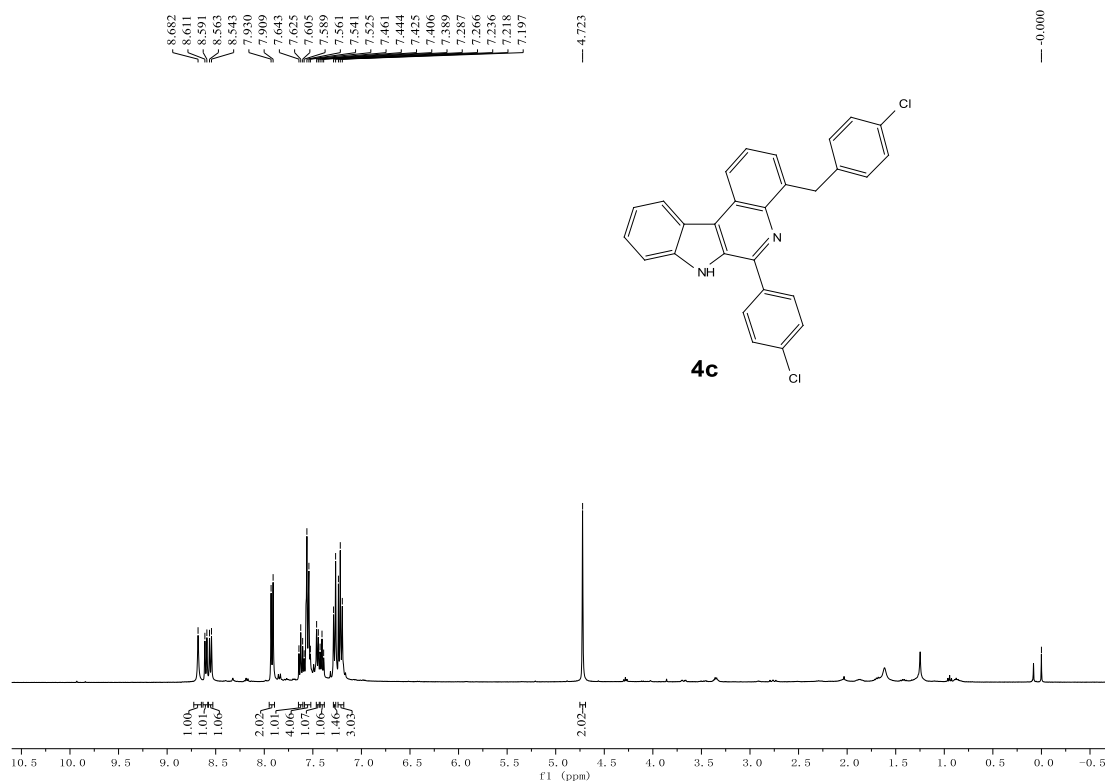

$^{13}\text{C}$  NMR of **4c** (400 MHz,  $\text{CDCl}_3$ ):

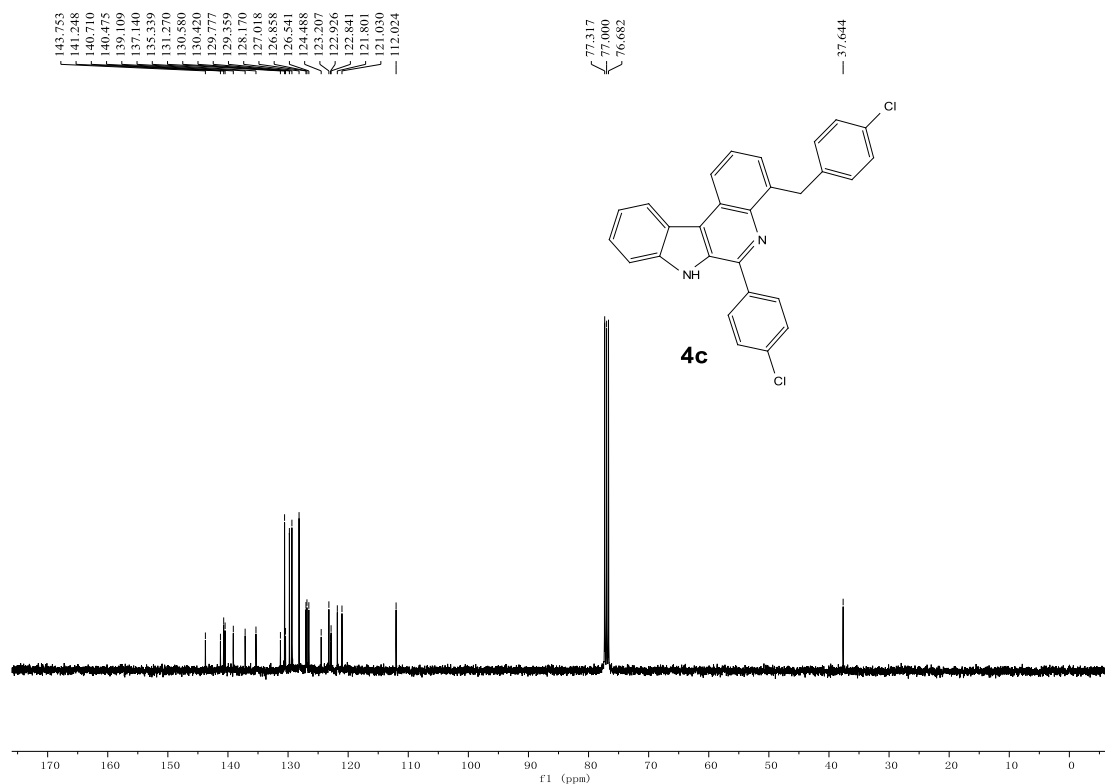

$^1\text{H}$  NMR of **4d** (400 MHz,  $\text{CDCl}_3$ ):

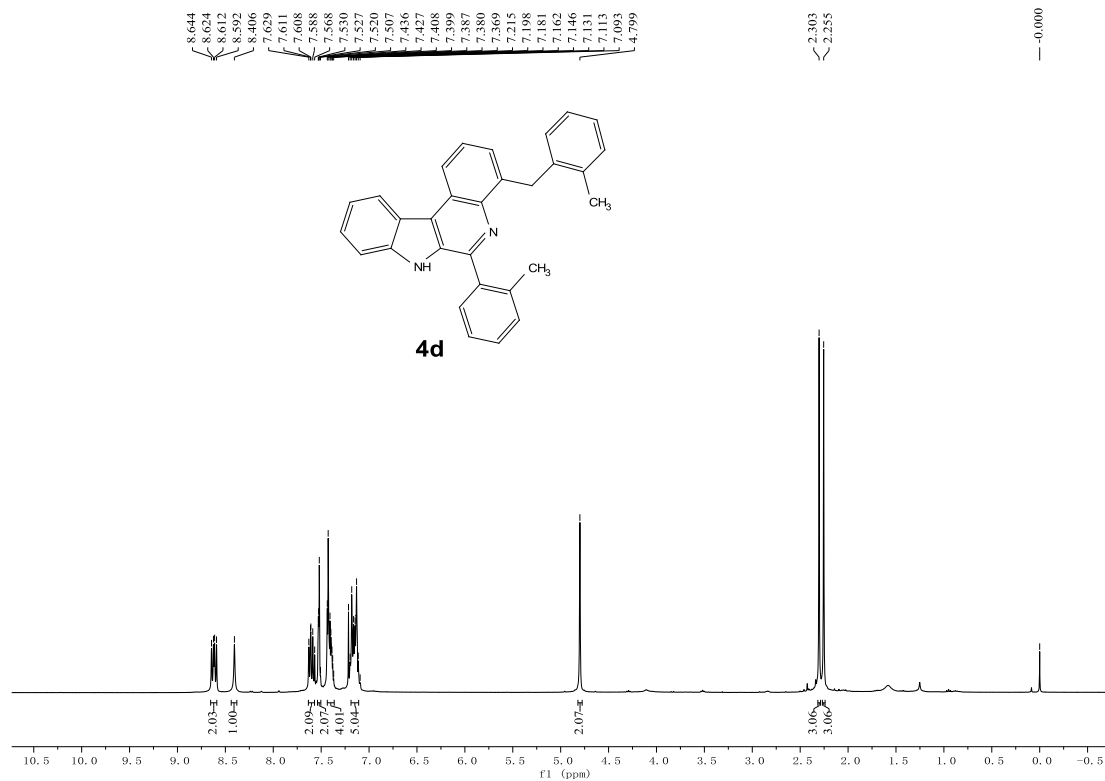

$^{13}\text{C}$  NMR of **4d** (400 MHz,  $\text{CDCl}_3$ ):

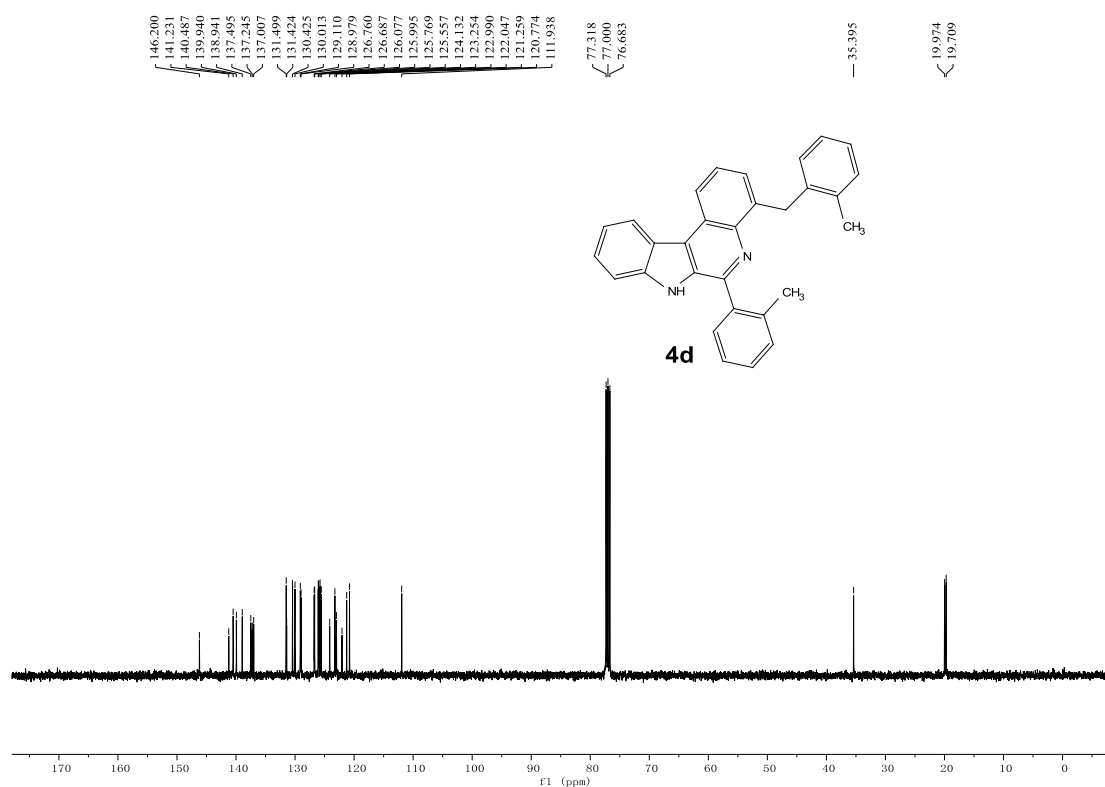

$^1\text{H}$  NMR of **4e** (400 MHz,  $\text{CDCl}_3$ ):

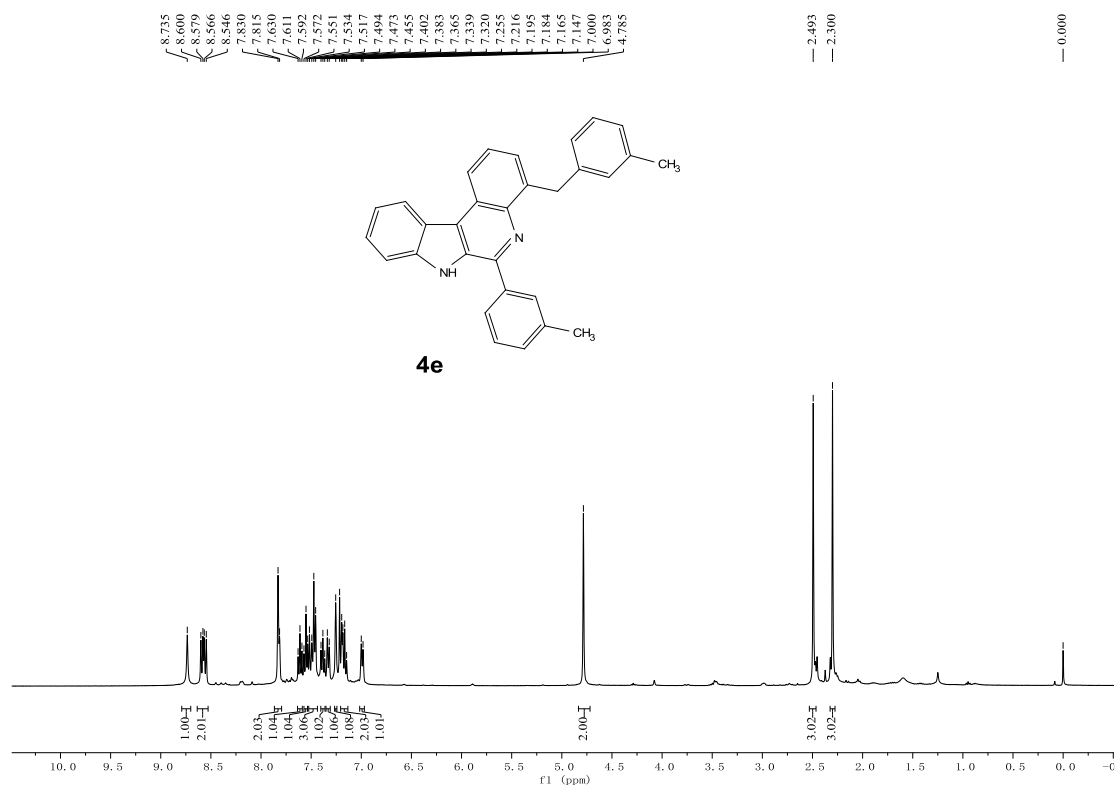

$^{13}\text{C}$  NMR of **4e** (400 MHz,  $\text{CDCl}_3$ ):

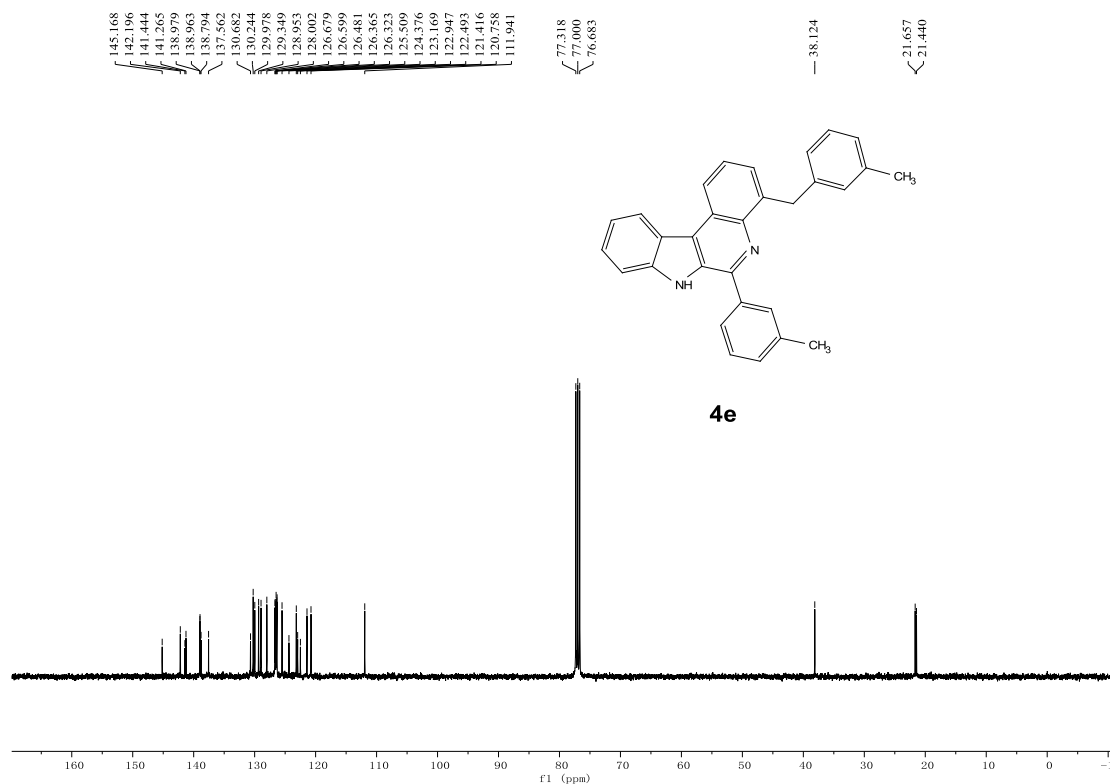

$^1\text{H}$  NMR of **4f** (400 MHz,  $\text{CDCl}_3$ ):

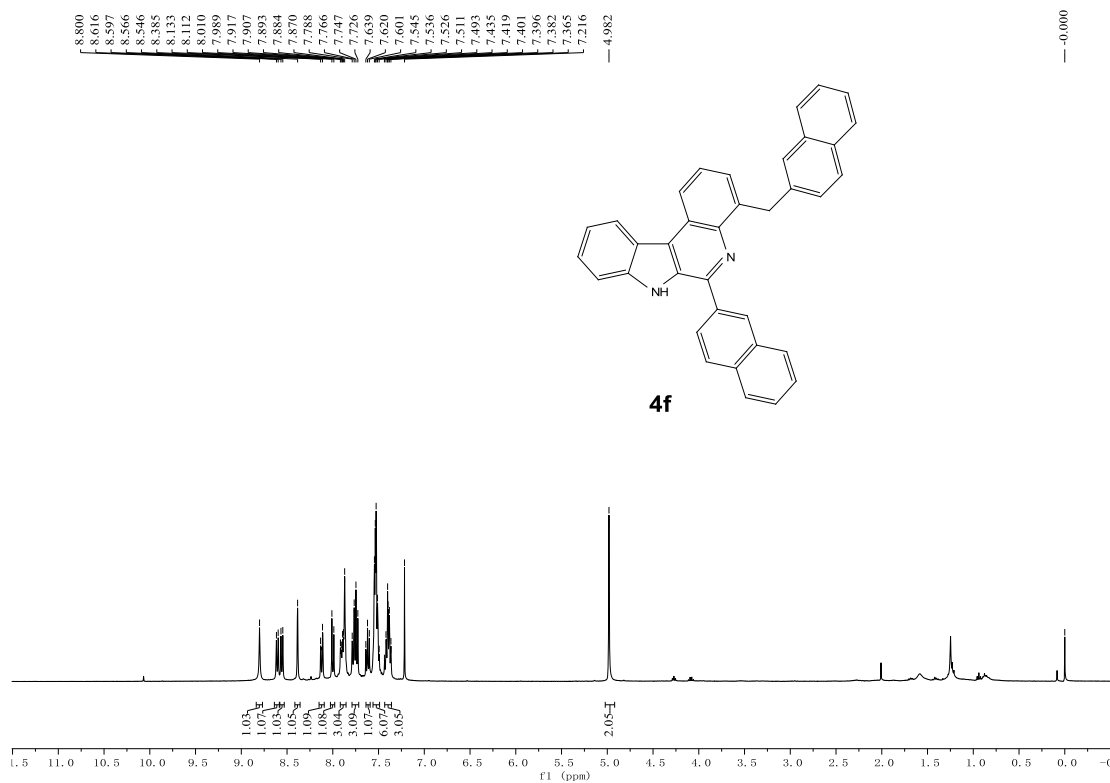



$^{13}\text{C}$  NMR of **4f** (400 MHz,  $\text{CDCl}_3$ ):

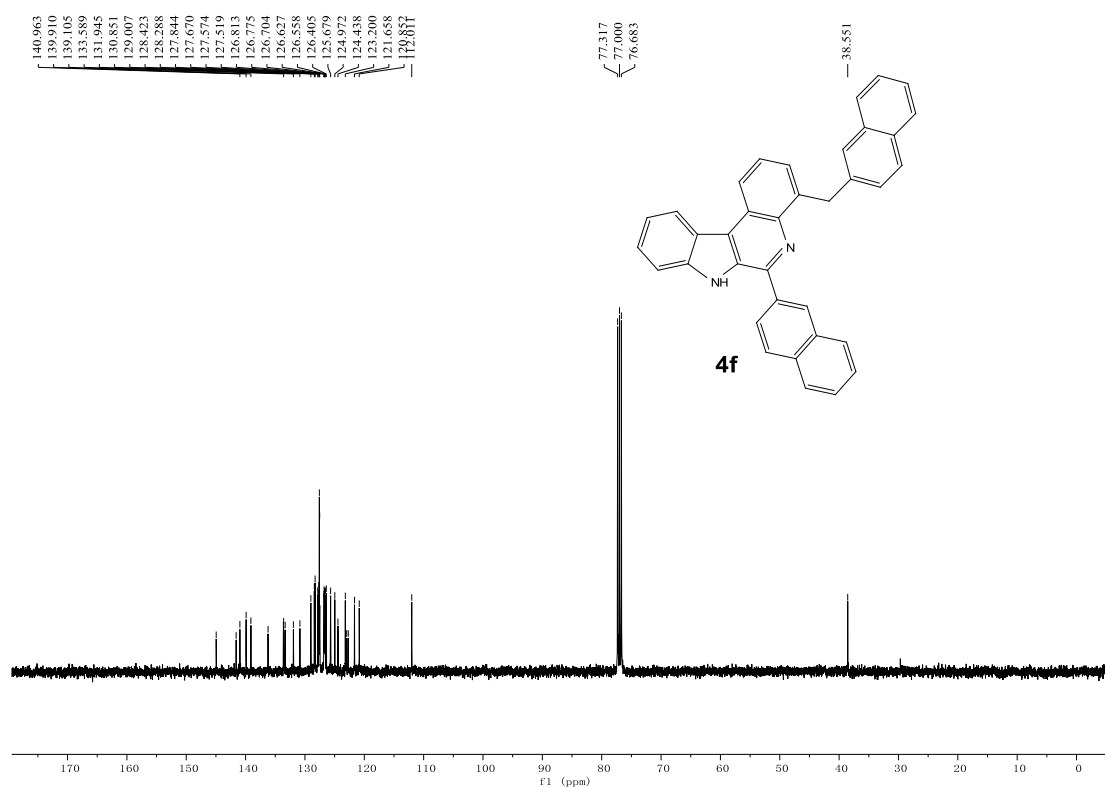

$^1\text{H}$  NMR of **4g** (400 MHz,  $\text{CDCl}_3$ ):

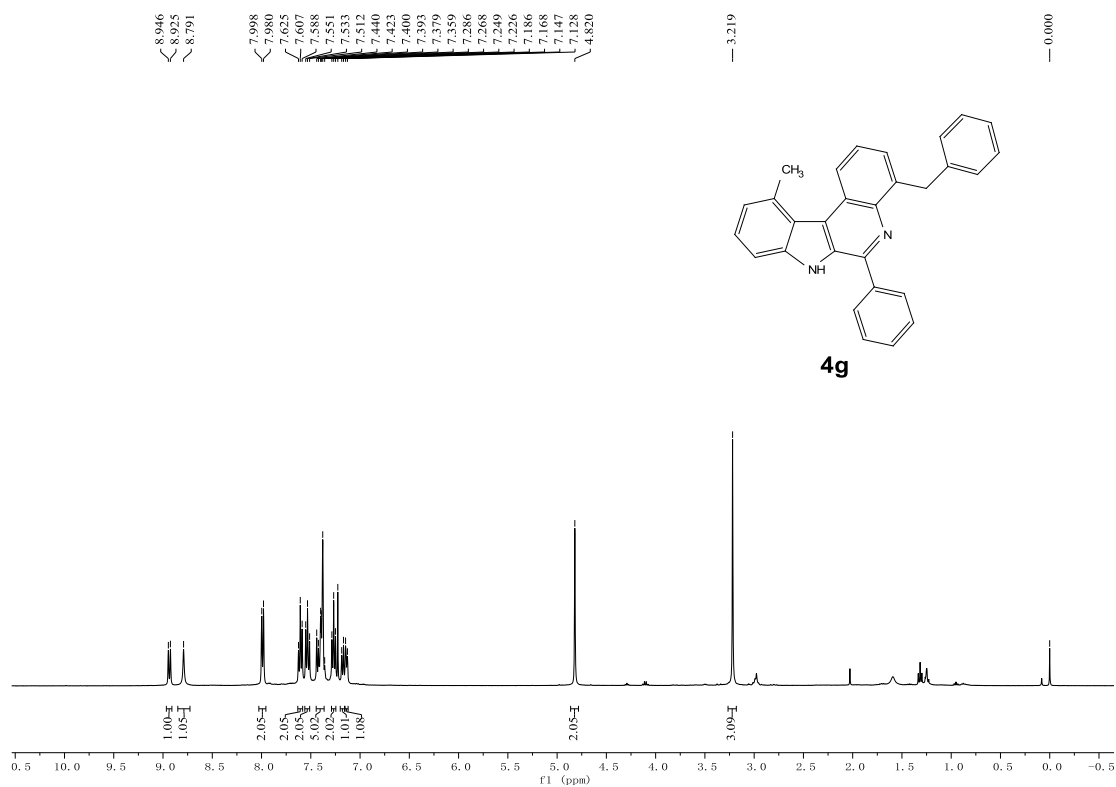

$^{13}\text{C}$  NMR of **4g** (400 MHz,  $\text{CDCl}_3$ ):

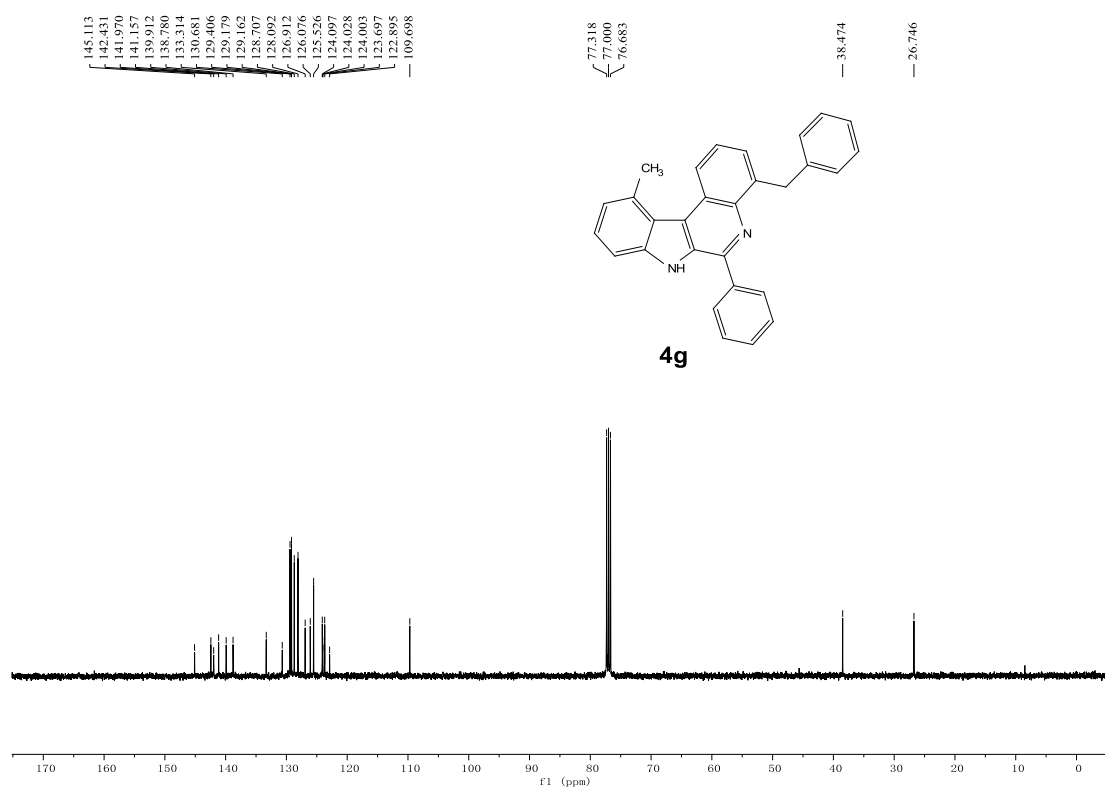

$^1\text{H}$  NMR of **4h** (400 MHz,  $\text{CDCl}_3$ ):

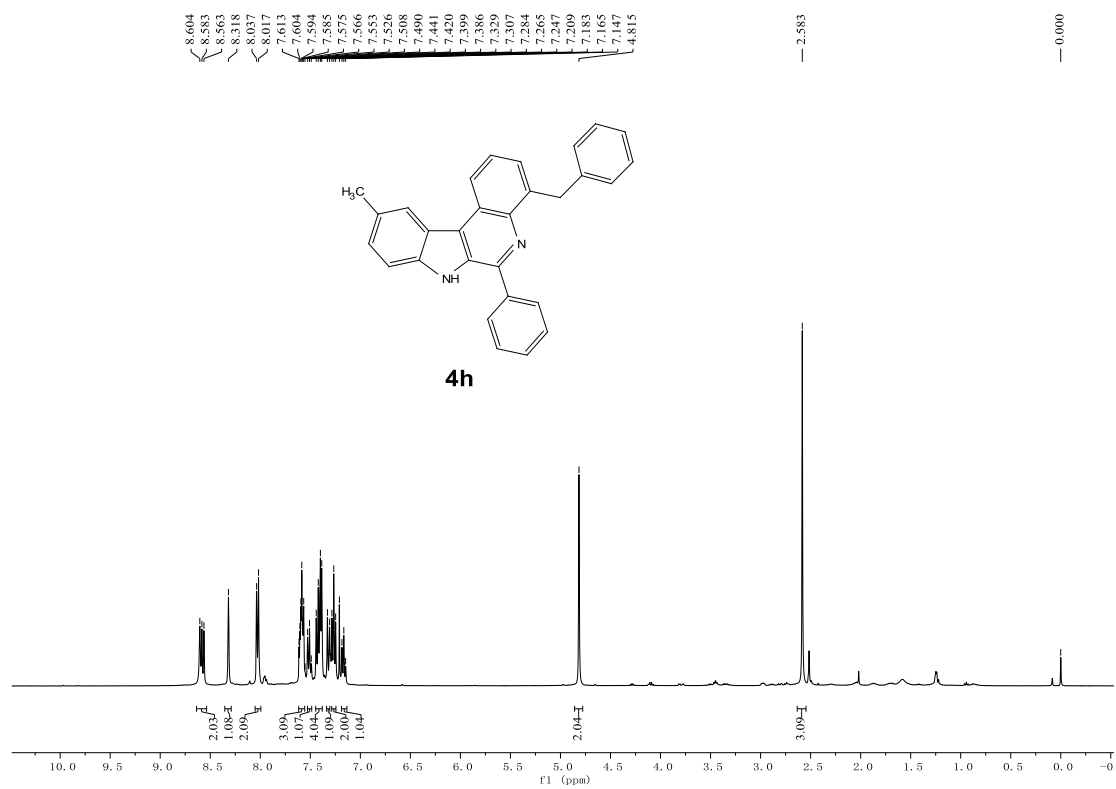

$^{13}\text{C}$  NMR of **4h** (400 MHz,  $\text{CDCl}_3$ ):

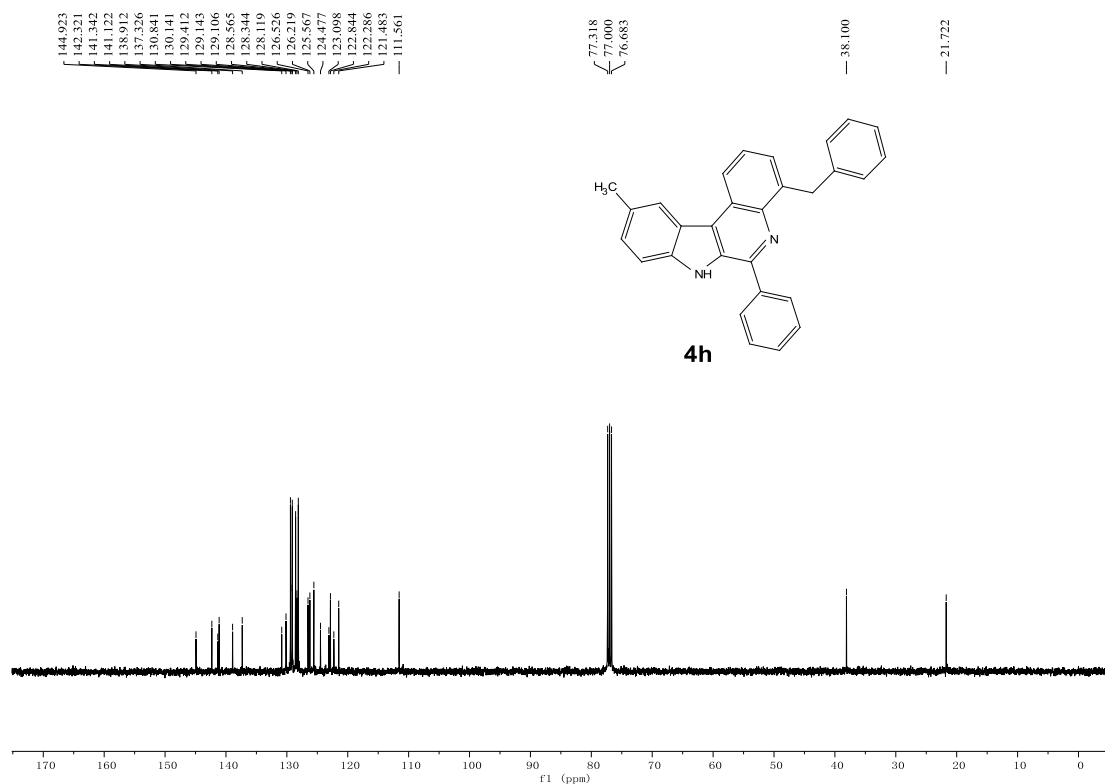

$^1\text{H}$  NMR of **4i** (400 MHz,  $\text{CDCl}_3$ ):

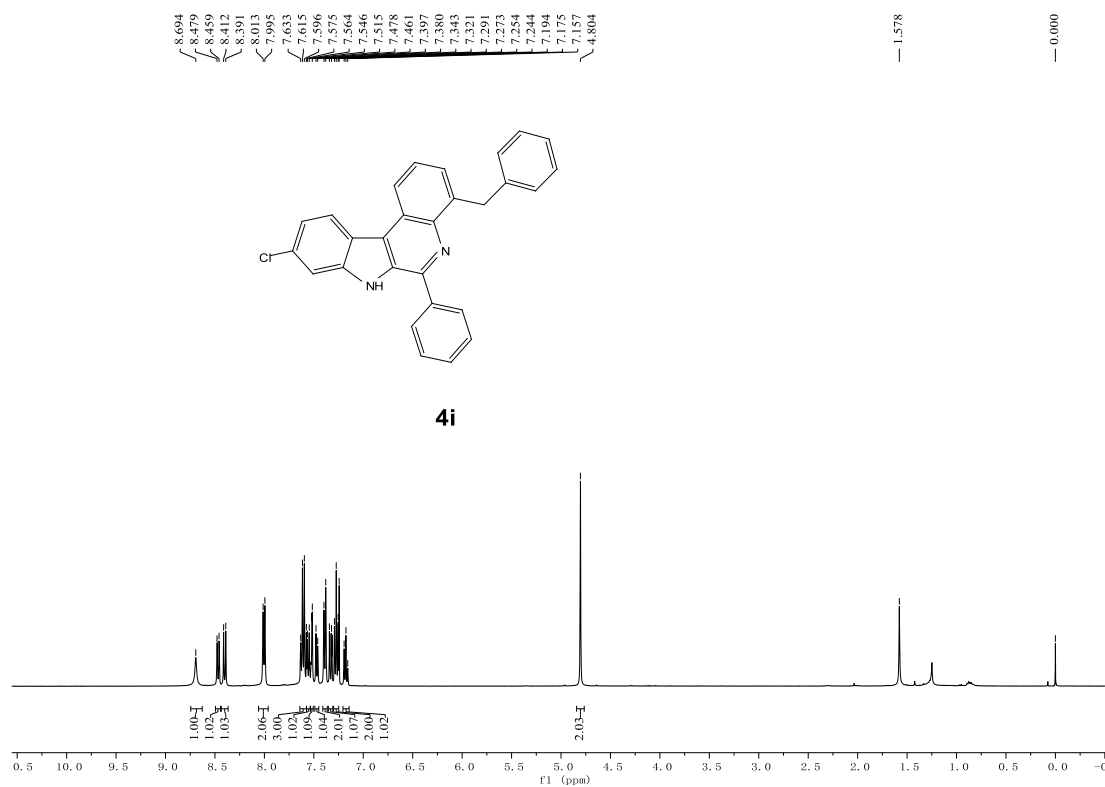

$^{13}\text{C}$  NMR of **4i** (400 MHz,  $\text{CDCl}_3$ ):

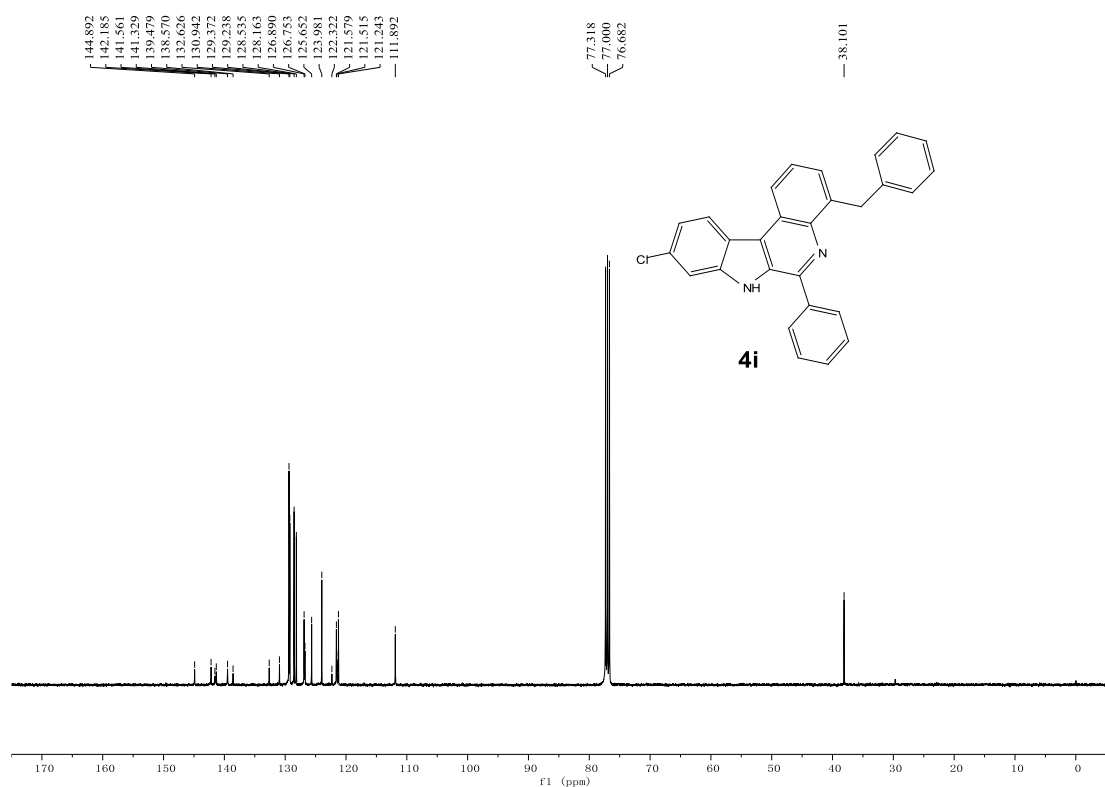

$^1\text{H}$  NMR of **4j** (400 MHz,  $\text{CDCl}_3$ ):

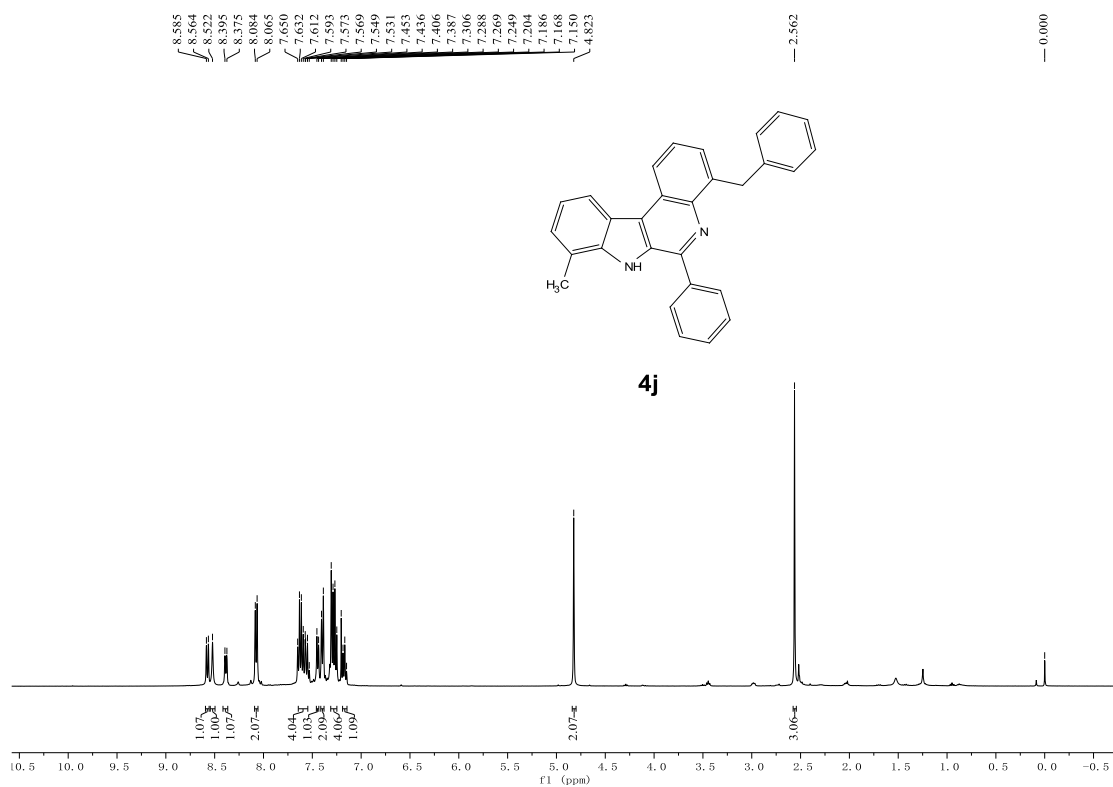

$^{13}\text{C}$  NMR of **4j** (400 MHz,  $\text{CDCl}_3$ ):

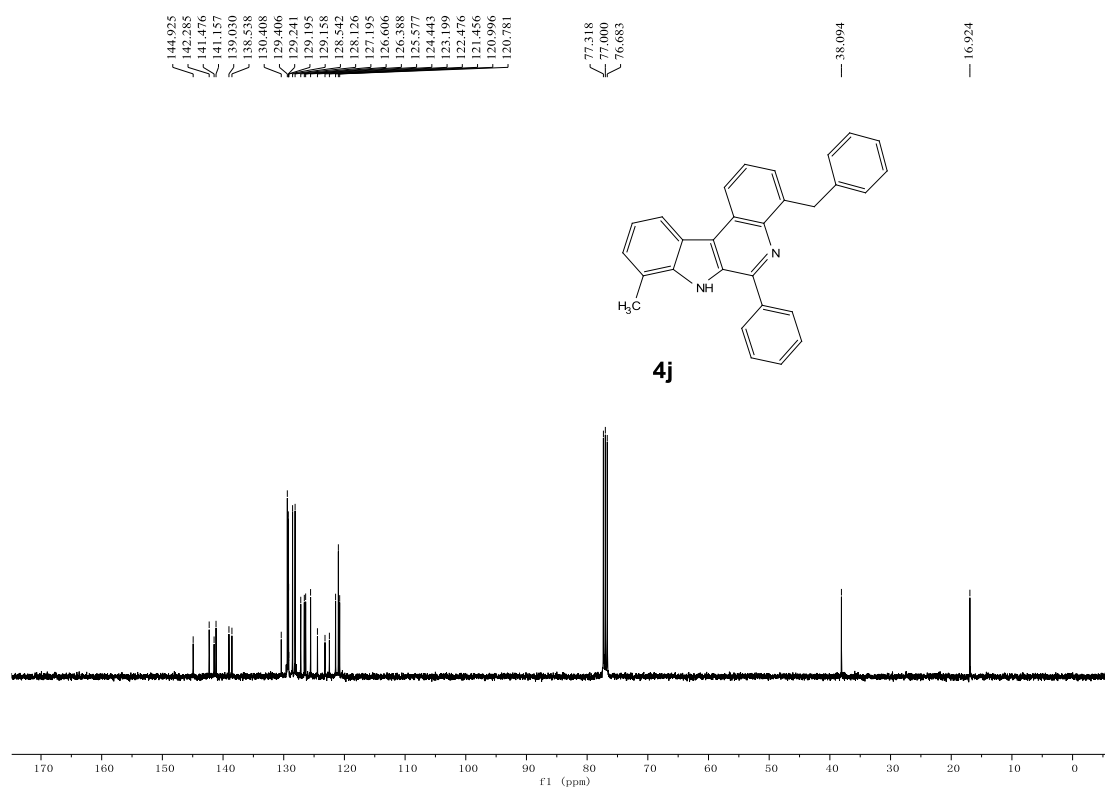

$^1\text{H}$  NMR of **4k** (400 MHz,  $\text{CDCl}_3$ ):

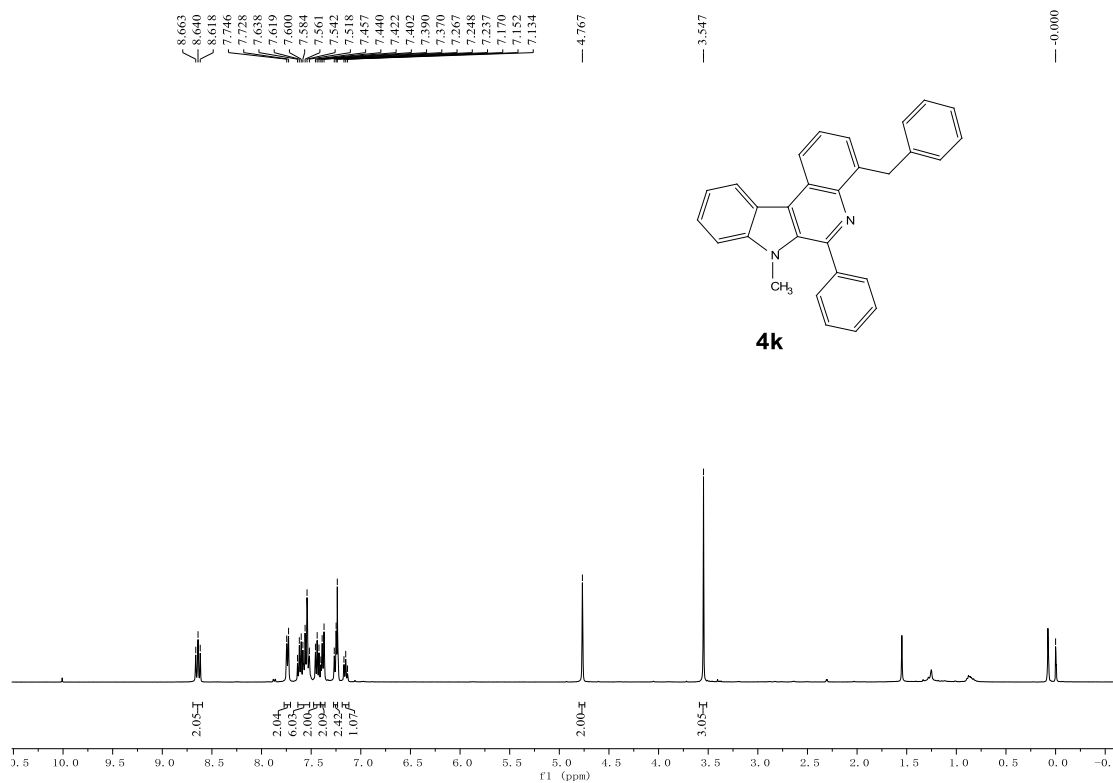

<sup>13</sup>C NMR of **4k** (400 MHz, CDCl<sub>3</sub>):

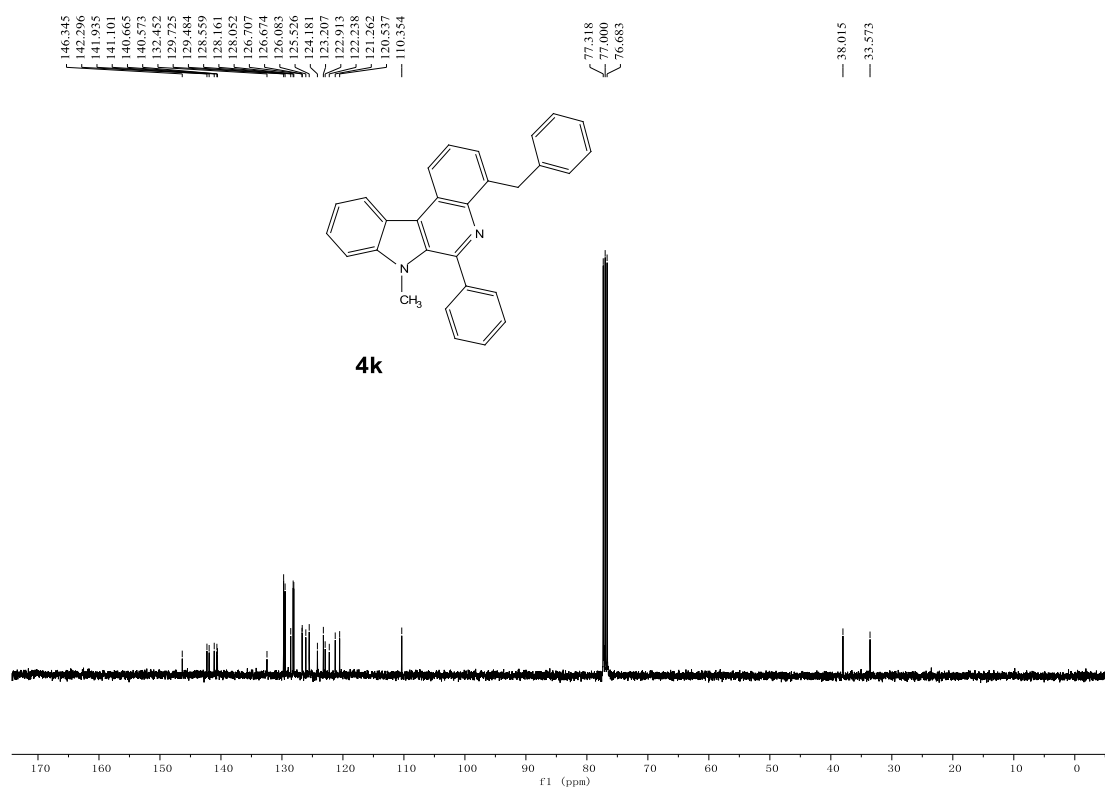

Supplement: d4qo00551a1.pdf [file d4qo00551a1.pdf]
